# Supplementary material
Source: PubMed Central journal article supplement (PMC5195896)
Supplement: NIHMS809006-supplement-Supp_Data_S1.pdf [file NIHMS809006-supplement-Supp_Data_S1.pdf]

**Data S1.** Metabolite levels in different organs and tissues of *E. purpurea*

| CLUSTER<br>(Defined<br>in Figure<br>1S) | Metab<br>olite # | Analytical<br>Platform | Chemical annotation                                                                  | Plant Organ or Tissue Sample # (Defined in Table 1 and Figure 1B) |                                |                   |                   |                   |                   |                                                  |                                                 |                                            |                                                          |                 |                |                          |
|-----------------------------------------|------------------|------------------------|--------------------------------------------------------------------------------------|-------------------------------------------------------------------|--------------------------------|-------------------|-------------------|-------------------|-------------------|--------------------------------------------------|-------------------------------------------------|--------------------------------------------|----------------------------------------------------------|-----------------|----------------|--------------------------|
|                                         |                  |                        |                                                                                      | 17                                                                | 18                             | 19                | 21                | 22                | 23                | 24                                               | 25                                              | 28                                         | 31                                                       | 34              | 35             | 36                       |
|                                         |                  |                        |                                                                                      | Petal of<br>stage 4<br>flowers                                    | Petal of<br>stage 5<br>flowers | Flower<br>Stage 1 | Flower<br>Stage 3 | Flower<br>Stage 4 | Flower<br>Stage 5 | Inflores<br>cence<br>stem -<br>apical<br>section | Inflores<br>cence<br>stem -<br>basal<br>section | Fully<br>expand<br>ed<br>cauline<br>leaves | Petiole<br>of fully<br>expand<br>ed<br>cauline<br>leaves | Lateral<br>Root | Basal<br>Root  | Entire<br>root<br>system |
| (nmol/g dry wt) +/- (standard error)    |                  |                        |                                                                                      |                                                                   |                                |                   |                   |                   |                   |                                                  |                                                 |                                            |                                                          |                 |                |                          |
| U                                       | 1                | Alkamides              | 1-Hexacosene                                                                         | 0.1 +/- 0                                                         | 0.1 +/- 0                      | 0.1 +/- 0         | 0.2 +/- 0         | 0.1 +/- 0         | 0.2 +/- 0         | 0.1 +/- 0                                        | 0.2 +/- 0.1                                     | 0.1 +/- 0                                  | 0.1 +/- 0                                                | 0.3 +/- 0.1     | 1.8 +/- 1.5    |                          |
| U                                       | 2                | Alkamides              | 7-Octadecenoic acid                                                                  | 0.1 +/- 0                                                         | 0.1 +/- 0                      | 0.1 +/- 0         | 0.2 +/- 0         | 0.1 +/- 0         | 0.2 +/- 0         | 0.1 +/- 0                                        | 4.7 +/- 4.1                                     | 0.1 +/- 0                                  | 0.5 +/- 0.4                                              | 0.1 +/- 0       | 11 +/- 3.6     |                          |
| C                                       | 3                | Alkamides              | 9,12-Octadecadienoic acid (Z,Z)                                                      | 30.4 +/- 12.1                                                     | 11.3 +/- 3                     | 52.3 +/- 11       | 49.8 +/- 9.7      | 58.1 +/- 14.6     | 34.1 +/- 6.2      | 47.2 +/- 14.5                                    | 41.1 +/- 16.5                                   | 11.3 +/- 1.7                               | 21.5 +/- 4.8                                             | 0 +/- 0         | 0 +/- 0        |                          |
| F                                       | 4                | Alkamides              | beta-Sitosterol                                                                      | 185.5 +/- 48                                                      | 78.4 +/- 25.8                  | 186 +/- 51.9      | 151.9 +/- 38.2    | 151 +/- 14.4      | 169.4 +/- 26.3    | 221.3 +/- 131.3                                  | 38.6 +/- 24.3                                   | 75.8 +/- 27.1                              | 142.7 +/- 91.6                                           | 78 +/- 4.3      | 124.4 +/- 24.5 | 45.1 +/- 14.3            |
| G                                       | 5                | Alkamides              | Campesterol                                                                          | 26.1 +/- 6.3                                                      | 15.9 +/- 5.6                   | 31.9 +/- 5.2      | 104.6 +/- 19.9    | 164.1 +/- 11.9    | 169.2 +/- 34.2    | 25.4 +/- 12.4                                    | 5.2 +/- 3.4                                     | 9.2 +/- 3.1                                | 17.2 +/- 10.2                                            | 12.3 +/- 2.4    | 30.7 +/- 7.9   | 8 +/- 2.3                |
| O                                       | 6                | Alkamides              | cis-9-Hexadecenoic acid                                                              | 0.1 +/- 0                                                         | 3.6 +/- 1.7                    | 0.6 +/- 0.3       | 0.2 +/- 0         | 0.1 +/- 0         | 0.2 +/- 0         | 1.4 +/- 0.8                                      | 1.1 +/- 0.8                                     | 1.4 +/- 0.7                                | 0.3 +/- 0.1                                              | 0.3 +/- 0.1     | 0.3 +/- 0.1    | 0.2 +/- 0.1              |
| J                                       | 7                | Alkamides              | Decanoic acid                                                                        | 2.4 +/- 1                                                         | 0.4 +/- 0.3                    | 0.2 +/- 0.1       | 0.5 +/- 0.2       | 0.2 +/- 0.1       | 4 +/- 3.1         | 0.9 +/- 0.7                                      | 0.3 +/- 0.1                                     | 0.5 +/- 0.3                                | 0.3 +/- 0.2                                              | 0.5 +/- 0.2     | 1.4 +/- 0.7    | 0.5 +/- 0.1              |
| Q                                       | 8                | Alkamides              | Docosane                                                                             | 9.4 +/- 4.9                                                       | 0.1 +/- 0                      | 3.4 +/- 0.3       | 4 +/- 3.4         | 8.4 +/- 4.7       | 1.1 +/- 0.9       | 2.4 +/- 1.1                                      | 3.4 +/- 3.3                                     | 0.5 +/- 0.4                                | 1.7 +/- 1                                                | 2.6 +/- 1.7     | 27 +/- 17.6    | 0.2 +/- 0.1              |
| U                                       | 9                | Alkamides              | dodeca-2E, 4E-dienoic acid isobutylamide (Bauer alkamide 11)                         | 13.5 +/- 3.2                                                      | 55.8 +/- 9.7                   | 5.8 +/- 1.2       | 13 +/- 3.9        | 10.9 +/- 1.1      | 35.3 +/- 2.2      | 6.5 +/- 1.8                                      | 18.1 +/- 6.7                                    | 5.6 +/- 3                                  | 8.1 +/- 4.4                                              | 5.7 +/- 0.4     | 26.5 +/- 10    | 185.2 +/- 67             |
| U                                       | 10               | Alkamides              | dodeca-2E, 4E, 8Z, 10E/Z-tetraenoic acid isobutylamide (Bauer alkamide 10)           | 0.1 +/- 0                                                         | 27.6 +/- 5.2                   | 0.1 +/- 0         | 1.4 +/- 0.7       | 1.2 +/- 0.6       | 8.1 +/- 1.1       | 0.4 +/- 0.3                                      | 3.6 +/- 2                                       | 3.3 +/- 1.8                                | 2.9 +/- 2.7                                              | 0.8 +/- 0.3     | 8.1 +/- 5.6    | 58.1 +/- 27.9            |
| U                                       | 11               | Alkamides              | dodeca-2E, 4E, 8Z, 10E/Z-tetraenoic acid isobutylamide (Bauer alkamide 8-9 isomer 1) | 29.5 +/- 6.3                                                      | 501.1 +/- 133                  | 18.9 +/- 1.5      | 119.1 +/- 52.5    | 104 +/- 20.8      | 327.2 +/- 37.5    | 21.4 +/- 7.3                                     | 209.1 +/- 80.3                                  | 8.5 +/- 3.9                                | 165.4 +/- 159                                            | 7.9 +/- 1.2     | 32.4 +/- 12.8  | 1202.2 +/- 673           |
| J                                       | 12               | Alkamides              | dodeca-2E, 4E, 8Z, 10E/Z-tetraenoic acid isobutylamide (Bauer alkamide 8-9 isomer 2) | 0.2 +/- 0.1                                                       | 0.1 +/- 0                      | 0.1 +/- 0         | 2.8 +/- 1.5       | 2.7 +/- 1.1       | 7.6 +/- 2         | 0.5 +/- 0.3                                      | 0.7 +/- 0.6                                     | 0.5 +/- 0.4                                | 1.5 +/- 1.3                                              | 0.1 +/- 0       | 0.3 +/- 0.1    | 0.2 +/- 0.1              |
| J                                       | 13               | Alkamides              | dodeca-2E, 4E, 8Z, 10E/Z-tetraenoic acid isobutylamide (Bauer alkamide 8-9 isomer 3) | 1.8 +/- 1.1                                                       | 31.5 +/- 8.4                   | 1.7 +/- 0.7       | 10.8 +/- 3.7      | 5.4 +/- 2         | 28.9 +/- 2        | 0.1 +/- 0                                        | 6.7 +/- 2.3                                     | 1.5 +/- 1.4                                | 0.1 +/- 0                                                | 1.2 +/- 0.7     | 4.1 +/- 3.9    | 25.1 +/- 20              |
| T                                       | 14               | Alkamides              | dodeca-2E, 4E, 8Z, 10E/Z-tetraenoic acid isobutylamide (Bauer alkamide 8-9 isomer 4) | 3.3 +/- 1.5                                                       | 94.7 +/- 22.2                  | 3.1 +/- 0.9       | 9.6 +/- 3.1       | 10.9 +/- 1.5      | 28.9 +/- 3.3      | 1.7 +/- 0.9                                      | 20.9 +/- 7.5                                    | 0.9 +/- 0.4                                | 0.1 +/- 0                                                | 0.4 +/- 0.2     | 8.7 +/- 7.8    | 133.8 +/- 80.2           |
| U                                       | 15               | Alkamides              | dodeca-2E, 4Z, diene-8, 10-diyenoic acid 2-methylbutylamide (Bauer alkamide 7)       | 0.1 +/- 0                                                         | 0.1 +/- 0                      | 0.1 +/- 0         | 0.2 +/- 0         | 0.1 +/- 0         | 0.2 +/- 0         | 0.1 +/- 0                                        | 0.2 +/- 0.1                                     | 0.1 +/- 0                                  | 0.1 +/- 0                                                | 2.5 +/- 1       | 18.6 +/- 8.8   | 69.2 +/- 9.9             |
| U                                       | 16               | Alkamides              | dodeca-2e, 4z-diene-8, 10-diyenoic acid isobutylamide (Bauer alkamide 3)             | 0.1 +/- 0                                                         | 0.1 +/- 0                      | 0.1 +/- 0         | 0.2 +/- 0         | 0.1 +/- 0         | 0.2 +/- 0         | 0.1 +/- 0                                        | 0.2 +/- 0.1                                     | 0.1 +/- 0                                  | 0.1 +/- 0                                                | 23.7 +/- 10.3   | 111.2 +/- 31.8 | 778.1 +/- 343.3          |
| O                                       | 17               | Alkamides              | Dodecanoic acid (combined TMS & methyl ester)                                        | 4.7 +/- 1.9                                                       | 12.6 +/- 5.8                   | 4.2 +/- 1.9       | 3.2 +/- 0.6       | 2.7 +/- 1.2       | 3.6 +/- 2.2       | 5.3 +/- 2.8                                      | 1.2 +/- 0.4                                     | 10.5 +/- 5.6                               | 2.3 +/- 1.1                                              | 1.3 +/- 0.9     | 2.8 +/- 0.7    | 1.1 +/- 0.3              |
| O                                       | 18               | Alkamides              | gamma-Sitosterol                                                                     | 0.1 +/- 0                                                         | 25 +/- 10.9                    | 0.1 +/- 0         | 0.2 +/- 0         | 0.9 +/- 0.8       | 0.2 +/- 0         | 9.9 +/- 4.7                                      | 35.7 +/- 32.2                                   | 12.5 +/- 9.3                               | 4.3 +/- 2                                                | 0.5 +/- 0.4     | 0.5 +/- 0.2    | 3.6 +/- 1.8              |
| H                                       | 19               | Alkamides              | Hexadecanoic acid (combined TMS & methyl ester)                                      | 22.6 +/- 10                                                       | 27.8 +/- 9                     | 52.4 +/- 15.4     | 47 +/- 10.1       | 111.1 +/- 79.8    | 70 +/- 30.4       | 33.5 +/- 6.2                                     | 36.2 +/- 14.4                                   | 32 +/- 8.1                                 | 30.4 +/- 15.2                                            | 8.3 +/- 1.9     | 7.2 +/- 2.9    | 27.5 +/- 10.3            |
| J                                       | 20               | Alkamides              | Hexadecenoic acid, Z-11-                                                             | 0.1 +/- 0                                                         | 0.1 +/- 0                      | 0.2 +/- 0.1       | 0.2 +/- 0         | 0.1 +/- 0         | 0.7 +/- 0.6       | 0.4 +/- 0.2                                      | 0.4 +/- 0.2                                     | 0.4 +/- 0.3                                | 0.1 +/- 0                                                | 0.1 +/- 0       | 0.3 +/- 0.1    | 0.2 +/- 0.1              |
| Q                                       | 21               | Alkamides              | Methyl 5,9-heptadecadienoate                                                         | 1.1 +/- 0.4                                                       | 0.1 +/- 0                      | 0.1 +/- 0         | 1.1 +/- 0.6       | 0.9 +/- 0.5       | 1.3 +/- 0.5       | 0.6 +/- 0.4                                      | 1.2 +/- 0.6                                     | 1.6 +/- 0.8                                | 0.5 +/- 0.3                                              | 0.1 +/- 0       | 5.4 +/- 5      | 0.7 +/- 0.6              |
| I                                       | 22               | Alkamides              | Methyl 5,9-octadecadienoate                                                          | 0.1 +/- 0                                                         | 0.1 +/- 0                      | 0.1 +/- 0         | 0.2 +/- 0         | 0.1 +/- 0         | 0.2 +/- 0         | 0.2 +/- 0.1                                      | 0.2 +/- 0.1                                     | 0.1 +/- 0                                  | 0.1 +/- 0                                                | 0.1 +/- 0       | 0.3 +/- 0.1    | 0.2 +/- 0.1              |
| H                                       | 23               | Alkamides              | Naphthalene                                                                          | 1.3 +/- 0.7                                                       | 2.1 +/- 1.1                    | 3.1 +/- 1.6       | 1.8 +/- 0.4       | 4.4 +/- 3.1       | 0.3 +/- 0.2       | 0.4 +/- 0.2                                      | 0.3 +/- 0.1                                     | 1.9 +/- 1.1                                | 0.1 +/- 0                                                | 0.1 +/- 0       | 0.3 +/- 0.1    | 0.2 +/- 0.1              |
| O                                       | 24               | Alkamides              | Octadecane                                                                           | 0.2 +/- 0                                                         | 4.2 +/- 1.6                    | 3.1 +/- 2.1       | 1.4 +/- 1.2       | 0.1 +/- 0         | 0.2 +/- 0         | 2.5 +/- 0.9                                      | 1 +/- 0.5                                       | 2.9 +/- 1.6                                | 2 +/- 0.4                                                | 0.1 +/- 0       | 0.4 +/- 0.2    | 1.9 +/- 0.7              |
| F                                       | 25               | Alkamides              | Octadecanoic acid (combined TMS and Methyl Esters)                                   | 29.3 +/- 7.4                                                      | 12.3 +/- 2.7                   | 38.6 +/- 7.8      | 36.7 +/- 10.3     | 28.4 +/- 4.3      | 26.9 +/- 7.6      | 18.2 +/- 11.5                                    | 10.1 +/- 5.7                                    | 4.8 +/- 0.8                                | 4.9 +/- 1.5                                              | 8.8 +/- 1.5     | 17.9 +/- 8.3   | 9.9 +/- 3.6              |
| K                                       | 26               | Alkamides              | Phytol                                                                               | 3.2 +/- 1.2                                                       | 29.9 +/- 9.3                   | 32.4 +/- 11       | 17.3 +/- 6.1      | 14.4 +/- 2.2      | 16.7 +/- 2.5      | 24 +/- 13.5                                      | 0.5 +/- 0.2                                     | 177.2 +/- 138.5                            | 5.8 +/- 2.1                                              | 0.1 +/- 0       | 0.3 +/- 0.1    | 0.2 +/- 0.1              |
| F                                       | 27               | Alkamides              | Stigmasterol                                                                         | 66.4 +/- 14.1                                                     | 29.1 +/- 10.6                  | 46.7 +/- 8.7      | 68.8 +/- 15.1     | 68.9 +/- 15.6     | 97.1 +/- 20.1     | 34.5 +/- 23.6                                    | 6.5 +/- 4.5                                     | 17.6 +/- 6.1                               | 25.1 +/- 13.2                                            | 39.7 +/- 6.6    | 62.9 +/- 15.1  | 25.3 +/- 8.6             |
| U                                       | 28               | Alkamides              | Tetracosane                                                                          | 0.5 +/- 0.3                                                       | 0.1 +/- 0                      | 0.7 +/- 0.6       | 1 +/- 0.4         | 5.8 +/- 3.7       | 2.8 +/- 1         | 0.8 +/- 0.8                                      | 1.4 +/- 0.9                                     | 0.1 +/- 0                                  | 0.4 +/- 0.3                                              | 0.1 +/- 0       | 0.3 +/- 0.1    | 11.9 +/- 7.5             |
| U                                       | 29               | Alkamides              | trideca-2E, 7Z-diene-10, 12-diyenoic acid isobutylamide (Bauer alkamide 6)           | 0.1 +/- 0                                                         | 0.1 +/- 0                      | 0.1 +/- 0         | 0.2 +/- 0         | 0.1 +/- 0         | 0.2 +/- 0         | 0.1 +/- 0                                        | 0.2 +/- 0.1                                     | 0.1 +/- 0                                  | 0.1 +/- 0                                                | 13.6 +/- 4.5    | 66.4 +/- 24.4  | 332.1 +/- 46.5           |

|    |           |                                  |                                                                              |                |               |               |               |               |               |               |              |             |               |               |               |                |
|----|-----------|----------------------------------|------------------------------------------------------------------------------|----------------|---------------|---------------|---------------|---------------|---------------|---------------|--------------|-------------|---------------|---------------|---------------|----------------|
| U  | 30        | Alkamides                        | undeca-2e, 4z-diene-8, 10-diyonic acid 2-methylbutylamide (Bauer alkamide 4) | 0.1 +/- 0      | 0.1 +/- 0     | 0.1 +/- 0     | 0.2 +/- 0     | 0.1 +/- 0     | 0.2 +/- 0     | 0.1 +/- 0     | 0.2 +/- 0.1  | 0.1 +/- 0   | 0.1 +/- 0     | 27.4 +/- 11.4 | 78.9 +/- 21.2 | 183.7 +/- 58.2 |
| U  | 31        | Alkamides                        | undeca-2Z, 4E-dien- 8, 10-diyonic acid isobutylamide (Bauer alkamide 2)      | 0 +/- 0        | 0.1 +/- 0     | 0 +/- 0       | 0 +/- 0       | 0 +/- 0       | 0 +/- 0       | 0.1 +/- 0     | 0.2 +/- 0.1  | 0.1 +/- 0   | 0.1 +/- 0     | 17 +/- 1      | 37 +/- 4.2    | 153.5 +/- 25.5 |
| O  | 32        | Alkamides                        | BJN-GCMS-alkamides-8.503-1647.4                                              | 0.1 +/- 0      | 5 +/- 1.6     | 0.1 +/- 0     | 0.2 +/- 0     | 0.1 +/- 0     | 0.2 +/- 0     | 0.5 +/- 0.3   | 0.2 +/- 0.1  | 2.5 +/- 2.3 | 0.4 +/- 0.2   | 0.1 +/- 0     | 0.3 +/- 0.1   | 0.5 +/- 0.3    |
| N  | 33        | Alkamides                        | BJN-GCMS-alkamides-10.723-1841.9                                             | 0.4 +/- 0.2    | 14.1 +/- 3.5  | 8.9 +/- 2.7   | 6.6 +/- 1.3   | 4.1 +/- 1.4   | 4.7 +/- 1.7   | 0.5 +/- 0.3   | 2.8 +/- 1.5  | 5.7 +/- 1.9 | 0.4 +/- 0.2   | 0.1 +/- 0     | 3.1 +/- 2.3   | 1.6 +/- 1      |
| U  | 34        | Alkamides                        | BJN-GCMS-alkamides-11.456-1887.9                                             | 0.1 +/- 0      | 4.8 +/- 1.4   | 0.1 +/- 0     | 0.2 +/- 0     | 1.8 +/- 1.7   | 0.2 +/- 0     | 0.3 +/- 0.2   | 0.5 +/- 0.2  | 1.1 +/- 0.5 | 0.5 +/- 0.3   | 1.1 +/- 0.6   | 6.6 +/- 4.1   | 44.1 +/- 13.7  |
| Q  | 35        | Alkamides                        | BJN-GCMS-alkamides-11.508-1891.1                                             | 2 +/- 0.9      | 0.1 +/- 0     | 6.2 +/- 1.8   | 4.3 +/- 1.4   | 6.4 +/- 3.3   | 2.1 +/- 0.7   | 2.1 +/- 1.1   | 1.1 +/- 0.7  | 2 +/- 1.2   | 1.3 +/- 0.8   | 5 +/- 2.6     | 11.8 +/- 5.6  | 0.2 +/- 0.1    |
| U  | 36        | Alkamides                        | BJN-GCMS-alkamides-11.58-1895.4                                              | 0.2 +/- 0      | 2.5 +/- 1.1   | 0.1 +/- 0     | 0.7 +/- 0.5   | 0.9 +/- 0.4   | 3 +/- 0.8     | 1.7 +/- 0.7   | 0.6 +/- 0.4  | 3 +/- 1.6   | 1.2 +/- 0.7   | 31.5 +/- 11.8 | 28.1 +/- 7.7  | 132.4 +/- 43.3 |
| H  | 37        | Alkamides                        | BJN-GCMS-alkamides-11.725-1904.1                                             | 0.2 +/- 0      | 3 +/- 1.3     | 4.6 +/- 3.6   | 1.3 +/- 1.1   | 7.9 +/- 7.8   | 1.5 +/- 1.3   | 5.1 +/- 1.3   | 0.8 +/- 0.5  | 3.9 +/- 1.9 | 2.5 +/- 1     | 0.1 +/- 0     | 0.3 +/- 0.1   | 0.2 +/- 0.1    |
| F  | 38        | Alkamides                        | BJN-GCMS-alkamides-11.743-1905.1                                             | 0.9 +/- 0.4    | 6.2 +/- 4.4   | 5.3 +/- 2.3   | 6.5 +/- 2.1   | 5 +/- 1.8     | 3.9 +/- 1.4   | 0.1 +/- 0     | 0.2 +/- 0.1  | 0.1 +/- 0   | 0.1 +/- 0     | 0.4 +/- 0.2   | 4.7 +/- 4     | 0.2 +/- 0.1    |
| N  | 39        | Alkamides                        | BJN-GCMS-alkamides-11.802-1908.6                                             | 0.1 +/- 0      | 9.1 +/- 6.8   | 0.1 +/- 0     | 0.2 +/- 0     | 0.1 +/- 0     | 0.2 +/- 0     | 0.1 +/- 0     | 0.2 +/- 0.1  | 0.6 +/- 0.5 | 0.1 +/- 0     | 0.1 +/- 0     | 0.3 +/- 0.1   | 0.2 +/- 0.1    |
| N  | 40        | Alkamides                        | BJN-GCMS-alkamides-11.848-1911.3                                             | 0.1 +/- 0      | 2.1 +/- 1.9   | 0.4 +/- 0.2   | 0.5 +/- 0.3   | 0.1 +/- 0     | 0.2 +/- 0     | 0.6 +/- 0.4   | 0.3 +/- 0.1  | 0.3 +/- 0.2 | 0.1 +/- 0     | 0.1 +/- 0     | 2.7 +/- 2.4   | 0.2 +/- 0.1    |
| G  | 41        | Alkamides                        | BJN-GCMS-alkamides-12.047-1922.9                                             | 3.1 +/- 1.7    | 0.1 +/- 0     | 0.1 +/- 0     | 0.2 +/- 0     | 9.8 +/- 9.7   | 0.2 +/- 0     | 1.4 +/- 0.7   | 0.4 +/- 0.2  | 0.8 +/- 0.5 | 0.5 +/- 0.3   | 0.2 +/- 0.1   | 4.5 +/- 3.5   | 0.5 +/- 0.3    |
| H  | 42        | Alkamides                        | BJN-GCMS-alkamides-12.085-1925.1                                             | 4.5 +/- 2.8    | 0.1 +/- 0     | 7.2 +/- 1.8   | 9.7 +/- 2.6   | 16.3 +/- 10.5 | 24.5 +/- 13.1 | 5.9 +/- 2.9   | 4.4 +/- 2.9  | 9.1 +/- 4.9 | 17.9 +/- 14.1 | 0.1 +/- 0     | 0.3 +/- 0.1   | 1.7 +/- 0.9    |
| Q  | 43        | Alkamides                        | BJN-GCMS-alkamides-12.332-1939.2                                             | 1.1 +/- 0.5    | 0.1 +/- 0     | 0.1 +/- 0     | 1.4 +/- 1.2   | 1.6 +/- 1.5   | 0.4 +/- 0.2   | 0.9 +/- 0.6   | 0.6 +/- 0.3  | 1.3 +/- 1   | 0.1 +/- 0     | 0.1 +/- 0     | 5.2 +/- 4.1   | 1.2 +/- 1      |
| U  | 44        | Alkamides                        | BJN-GCMS-alkamides-12.382-1942.0                                             | 0.2 +/- 0.1    | 0.1 +/- 0     | 0.4 +/- 0.3   | 0.5 +/- 0.3   | 0.1 +/- 0     | 0.2 +/- 0     | 1.3 +/- 0.6   | 0.2 +/- 0.1  | 2.3 +/- 1.1 | 0.6 +/- 0.4   | 1.4 +/- 0.6   | 4.9 +/- 3.5   | 32.5 +/- 11.7  |
| G  | 45        | Alkamides                        | BJN-GCMS-alkamides-12.42-1944.1                                              | 3.7 +/- 3      | 0.1 +/- 0     | 2.9 +/- 2.8   | 2 +/- 1.2     | 21.9 +/- 21.8 | 3.4 +/- 3.3   | 0.1 +/- 0     | 0.4 +/- 0.2  | 0.1 +/- 0   | 0.1 +/- 0     | 2.3 +/- 1.2   | 0.5 +/- 0.2   | 0.2 +/- 0.1    |
| K  | 46        | Alkamides                        | BJN-GCMS-alkamides-12.464-1946.6                                             | 0.2 +/- 0      | 0.1 +/- 0     | 0.1 +/- 0     | 1.7 +/- 1.6   | 0.7 +/- 0.6   | 2 +/- 1.2     | 0.5 +/- 0.3   | 0.3 +/- 0.2  | 3.5 +/- 3.4 | 0.7 +/- 0.3   | 0.1 +/- 0     | 0.3 +/- 0.1   | 0.2 +/- 0.1    |
| H  | 47        | Alkamides                        | BJN-GCMS-alkamides-12.508-1949.1                                             | 0.4 +/- 0.3    | 0.1 +/- 0     | 3 +/- 1       | 0.9 +/- 0.5   | 1.3 +/- 0.6   | 1.3 +/- 0.7   | 2.1 +/- 1.1   | 0.8 +/- 0.3  | 3.6 +/- 2.5 | 0.3 +/- 0.2   | 0.1 +/- 0     | 0.8 +/- 0.5   | 0.3 +/- 0.1    |
| U  | 48        | Alkamides                        | BJN-GCMS-alkamides-12.623-1955.4                                             | 4.7 +/- 1.7    | 12.2 +/- 3.6  | 42.2 +/- 12.2 | 30.2 +/- 7.3  | 38.3 +/- 7.3  | 21.8 +/- 2.6  | 5.3 +/- 3.5   | 2.9 +/- 1.8  | 9.3 +/- 5.2 | 3.7 +/- 1.8   | 6.2 +/- 2     | 15.6 +/- 7.4  | 91 +/- 31.5    |
| N  | 49        | Alkamides                        | BJN-GCMS-alkamides-12.66-1957.5                                              | 0.1 +/- 0      | 1.6 +/- 0.9   | 0.1 +/- 0     | 0.4 +/- 0.3   | 0.1 +/- 0     | 0.2 +/- 0     | 0.1 +/- 0     | 0.4 +/- 0.2  | 0.1 +/- 0   | 0.1 +/- 0     | 0.1 +/- 0     | 0.3 +/- 0.1   | 0.2 +/- 0.1    |
| I  | 50        | Alkamides                        | BJN-GCMS-alkamides-12.821-1966.3                                             | 0.1 +/- 0      | 0.1 +/- 0     | 0.1 +/- 0     | 0.3 +/- 0.1   | 0.1 +/- 0     | 0.2 +/- 0     | 0.2 +/- 0.2   | 0.2 +/- 0.1  | 0.1 +/- 0   | 0.1 +/- 0     | 0.1 +/- 0     | 0.3 +/- 0.1   | 0.2 +/- 0.1    |
| T  | 51        | Alkamides                        | BJN-GCMS-alkamides-13.034-1977.7 (Possible alkamide )                        | 3.5 +/- 1      | 15.7 +/- 5.3  | 3.9 +/- 0.6   | 6.8 +/- 2.3   | 8 +/- 1.4     | 12 +/- 1.7    | 2.1 +/- 0.9   | 4.9 +/- 1.4  | 3.5 +/- 1.1 | 3.6 +/- 2.3   | 0.6 +/- 0.2   | 9 +/- 6.6     | 16.8 +/- 10.2  |
| T  | 52        | Alkamides                        | BJN-GCMS-alkamides-13.257-1989.5 (Possible alkamide )                        | 1.4 +/- 0.8    | 8.3 +/- 1.8   | 1.4 +/- 1     | 4.8 +/- 2.4   | 10.1 +/- 4.8  | 6.7 +/- 1     | 0.7 +/- 0.5   | 2.2 +/- 1.1  | 2.3 +/- 0.7 | 1.9 +/- 1.3   | 0.1 +/- 0     | 9 +/- 7.1     | 10.1 +/- 6.2   |
| Q  | 53        | Alkamides                        | BJN-GCMS-alkamides-13.298-1991.7                                             | 0.9 +/- 0.3    | 0.1 +/- 0     | 0.1 +/- 0     | 1.5 +/- 1.2   | 0.3 +/- 0.2   | 0.4 +/- 0.2   | 0.9 +/- 0.5   | 0.2 +/- 0.1  | 0.1 +/- 0   | 0.1 +/- 0     | 0.9 +/- 0.4   | 1.4 +/- 0.6   | 0.7 +/- 0.5    |
| Q  | 54        | Alkamides                        | BJN-GCMS-alkamides-13.344-1994.1                                             | 3.8 +/- 2.2    | 3.8 +/- 1.2   | 4.6 +/- 1.3   | 6.4 +/- 2.2   | 7.1 +/- 2.1   | 2.9 +/- 0.9   | 0.5 +/- 0.2   | 0.8 +/- 0.5  | 0.6 +/- 0.2 | 0.3 +/- 0.1   | 1.7 +/- 0.8   | 17.3 +/- 12.3 | 0.3 +/- 0.2    |
| A  | 55        | Alkamides                        | BJN-GCMS-alkamides-13.39-1996.5                                              | 127.3 +/- 60.2 | 5.4 +/- 2.2   | 0.1 +/- 0     | 0.9 +/- 0.7   | 12.6 +/- 2.4  | 0.8 +/- 0.5   | 2 +/- 1.2     | 1.3 +/- 0.9  | 2.8 +/- 2   | 1.7 +/- 1.1   | 0.1 +/- 0     | 0.6 +/- 0.4   | 4.6 +/- 3.5    |
| G  | 56        | Alkamides                        | BJN-GCMS-alkamides-13.717-2009.8                                             | 13.6 +/- 7.4   | 22.5 +/- 12.3 | 2.2 +/- 1.8   | 3.8 +/- 1.6   | 63.2 +/- 60.1 | 26.1 +/- 22   | 0.4 +/- 0.2   | 0.3 +/- 0.2  | 0.8 +/- 0.5 | 0.4 +/- 0.3   | 0.3 +/- 0.2   | 9.7 +/- 7.8   | 4.6 +/- 1.9    |
| K  | 57        | Alkamides                        | BJN-GCMS-alkamides-13.761-2011.4                                             | 0.1 +/- 0      | 0.1 +/- 0     | 0.1 +/- 0     | 0.2 +/- 0     | 0.5 +/- 0.3   | 0.2 +/- 0     | 0.1 +/- 0     | 1.1 +/- 0.2  | 1.8 +/- 0.9 | 1.7 +/- 1.2   | 0.4 +/- 0.3   | 0.3 +/- 0.1   | 0.2 +/- 0.1    |
| S  | 58        | Alkamides                        | BJN-GCMS-alkamides-13.802-2012.9                                             | 0.5 +/- 0.3    | 0.1 +/- 0     | 0.1 +/- 0     | 0.2 +/- 0     | 0.1 +/- 0     | 0.2 +/- 0.1   | 2.4 +/- 0.9   | 0.5 +/- 0.3  | 0.1 +/- 0   | 0.1 +/- 0     | 0.1 +/- 0     | 0.5 +/- 0.2   | 3.2 +/- 1.9    |
| G  | 59        | Alkamides                        | BJN-GCMS-alkamides-13.854-2014.9                                             | 1.1 +/- 0.8    | 0.1 +/- 0     | 0.1 +/- 0     | 0.2 +/- 0     | 2.9 +/- 2.8   | 0.3 +/- 0.1   | 0.1 +/- 0     | 0.4 +/- 0.2  | 0.1 +/- 0   | 0.1 +/- 0     | 0.2 +/- 0     | 0.3 +/- 0.1   | 0.2 +/- 0.1    |
| 60 | Alkamides | BJN-GCMS-alkamides-13.892-2016.3 | 0.1 +/- 0                                                                    | 0.1 +/- 0      | 0.9 +/- 0.8   | 3 +/- 2.8     | 1.1 +/- 1     | 0.2 +/- 0     | 0.4 +/- 0.4   | 0.7 +/- 0.5   | 1.7 +/- 0.9  | 0.1 +/- 0   | 0.5 +/- 0.3   | 3.7 +/- 3.4   | 1.5 +/- 0.5   |                |
| T  | 61        | Alkamides                        | BJN-GCMS-alkamides-13.941-2018.1                                             | 0.8 +/- 0.5    | 0.1 +/- 0     | 1.2 +/- 0.5   | 1.6 +/- 0.6   | 1.1 +/- 1     | 0.6 +/- 0.3   | 0.4 +/- 0.4   | 0.2 +/- 0.1  | 0.1 +/- 0   | 0.1 +/- 0     | 0.1 +/- 0     | 0.3 +/- 0.1   | 1.8 +/- 1.6    |
| J  | 62        | Alkamides                        | BJN-GCMS-alkamides-13.96-2018.7                                              | 0.2 +/- 0.1    | 0.7 +/- 0.6   | 0.1 +/- 0     | 1.4 +/- 0.9   | 1.4 +/- 0.7   | 5.4 +/- 1.7   | 0.1 +/- 0     | 0.2 +/- 0.1  | 1.2 +/- 1.1 | 0.1 +/- 0     | 0.1 +/- 0     | 0.3 +/- 0.1   | 0.5 +/- 0.2    |
| R  | 63        | Alkamides                        | BJN-GCMS-alkamides-14.076-2023.0                                             | 0.1 +/- 0      | 0.1 +/- 0     | 0.3 +/- 0.1   | 2.9 +/- 2.6   | 2.5 +/- 1.5   | 0.6 +/- 0.3   | 0.1 +/- 0     | 0.7 +/- 0.5  | 0.1 +/- 0   | 0.1 +/- 0     | 0.1 +/- 0     | 9.6 +/- 6.8   | 7.8 +/- 6.9    |
| R  | 64        | Alkamides                        | BJN-GCMS-alkamides-14.179-2026.8                                             | 2.1 +/- 1.7    | 0.1 +/- 0     | 0.8 +/- 0.6   | 0.2 +/- 0     | 0.1 +/- 0     | 0.2 +/- 0     | 1 +/- 0.6     | 0.2 +/- 0.1  | 0.9 +/- 0.8 | 0.1 +/- 0     | 0.6 +/- 0.4   | 4.4 +/- 3.6   | 3.5 +/- 2.9    |
| J  | 65        | Alkamides                        | BJN-GCMS-alkamides-14.212-2028.0                                             | 0.1 +/- 0      | 10.5 +/- 2.2  | 36.4 +/- 24.4 | 51.5 +/- 17.6 | 42.9 +/- 30.4 | 95 +/- 36     | 0.1 +/- 0     | 0.6 +/- 0.2  | 0.6 +/- 0.3 | 2.1 +/- 2     | 15.5 +/- 15.4 | 0.3 +/- 0.1   | 2.3 +/- 1.1    |
| U  | 66        | Alkamides                        | BJN-GCMS-alkamides-14.258-2029.6                                             | 0 +/- 0        | 0.1 +/- 0     | 0 +/- 0       | 0 +/- 0       | 0 +/- 0       | 0 +/- 0       | 0.4 +/- 0.2   | 0.2 +/- 0.1  | 0.8 +/- 0.5 | 0.1 +/- 0     | 0 +/- 0       | 0.1 +/- 0     | 2.5 +/- 1.3    |
| U  | 67        | Alkamides                        | BJN-GCMS-alkamides-14.605-2041.9                                             | 0 +/- 0        | 0.1 +/- 0     | 0 +/- 0       | 0 +/- 0       | 0 +/- 0       | 1 +/- 0.9     | 0.1 +/- 0     | 0.2 +/- 0.1  | 0.1 +/- 0   | 0.1 +/- 0     | 0 +/- 0       | 0.1 +/- 0     | 2.6 +/- 2.4    |
| K  | 68        | Alkamides                        | BJN-GCMS-alkamides-14.786-2048.3                                             | 0 +/- 0        | 0.1 +/- 0     | 0 +/- 0       | 0 +/- 0       | 0 +/- 0       | 1 +/- 0.9     | 0.1 +/- 0     | 0.2 +/- 0.1  | 6 +/- 3.9   | 2.2 +/- 2     | 0 +/- 0       | 0.1 +/- 0     | 0.2 +/- 0.1    |
| M  | 69        | Alkamides                        | BJN-GCMS-alkamides-14.876-2051.4                                             | 0 +/- 0        | 0.1 +/- 0     | 0 +/- 0       | 0 +/- 0       | 0 +/- 0       | 0 +/- 0       | 23.6 +/- 16.2 | 15.2 +/- 6.1 | 1.8 +/- 1.7 | 7.2 +/- 7.1   | 0 +/- 0       | 0.1 +/- 0     | 0.2 +/- 0.1    |
| U  | 70        | Alkamides                        | BJN-GCMS-alkamides-15.045-2057.2 (Possible alkamide)                         | 0 +/- 0        | 3.8 +/- 0.5   | 0 +/- 0       | 0 +/- 0       | 0 +/- 0       | 0 +/- 0       | 5.9 +/- 2.9   | 4.7 +/- 2.1  | 4.3 +/- 1.9 | 6 +/- 2.5     | 0 +/- 0       | 0.1 +/- 0     | 28.5 +/- 9.9   |
| N  | 71        | Alkamides                        | BJN-GCMS-alkamides-15.322-2066.6                                             | 8.3 +/- 3.3    | 14.1 +/- 1.5  | 3 +/- 1.5     | 0.8 +/- 0.6   | 1.3 +/- 1.2   | 2.5 +/- 1.5   | 0.1 +/- 0     | 0.2 +/- 0.1  | 0.1 +/- 0   | 0.1 +/- 0     | 2.9 +/- 1     | 5.9 +/- 1.9   | 0.2 +/- 0.1    |

|   |     |           |                                                      |              |               |             |              |             |              |                |              |               |               |              |               |                |
|---|-----|-----------|------------------------------------------------------|--------------|---------------|-------------|--------------|-------------|--------------|----------------|--------------|---------------|---------------|--------------|---------------|----------------|
| T | 72  | Alkamides | BJN-GCMS-alkamides-15.455-2071.0                     | 2.7 +/- 1.8  | 8.5 +/- 2.1   | 0.7 +/- 0.6 | 4.5 +/- 2.2  | 2.7 +/- 1.3 | 3.5 +/- 2.2  | 1.8 +/- 1.1    | 1.9 +/- 1.8  | 0.1 +/- 0     | 0.1 +/- 0     | 0.1 +/- 0    | 4.9 +/- 4.6   | 5.1 +/- 4.9    |
| U | 73  | Alkamides | BJN-GCMS-alkamides-15.561-2074.5 (Possible alkamide) | 0.1 +/- 0    | 0.1 +/- 0     | 1.9 +/- 1.8 | 0.2 +/- 0    | 0.1 +/- 0   | 0.2 +/- 0    | 3.2 +/- 1.5    | 4.4 +/- 2.8  | 1.9 +/- 0.9   | 1.4 +/- 1     | 0.1 +/- 0    | 0.3 +/- 0.1   | 46.7 +/- 11.7  |
| P | 74  | Alkamides | BJN-GCMS-alkamides-15.7-2079.1 (Possible alkamide)   | 0.1 +/- 0    | 0.1 +/- 0     | 0.1 +/- 0   | 0.2 +/- 0    | 0.1 +/- 0   | 0.2 +/- 0    | 0.1 +/- 0      | 0.2 +/- 0.1  | 0.1 +/- 0     | 0.1 +/- 0     | 46.5 +/- 9.3 | 38.1 +/- 7    | 22.2 +/- 12.1  |
| U | 75  | Alkamides | BJN-GCMS-alkamides-15.875-2084.8 (Possible alkamide) | 0.1 +/- 0    | 0.1 +/- 0     | 0.1 +/- 0   | 0.2 +/- 0    | 0.1 +/- 0   | 0.2 +/- 0    | 0.1 +/- 0      | 0.2 +/- 0.1  | 0.1 +/- 0     | 0.1 +/- 0     | 9.9 +/- 1.3  | 4.7 +/- 1.6   | 23.8 +/- 3.3   |
| Q | 76  | Alkamides | BJN-GCMS-alkamides-16.05-2088.2                      | 8.4 +/- 5.4  | 0.1 +/- 0     | 0.1 +/- 0   | 0.2 +/- 0    | 5.4 +/- 5.3 | 0.2 +/- 0    | 0.1 +/- 0      | 0.2 +/- 0.1  | 0.1 +/- 0     | 0.1 +/- 0     | 0 +/- 0      | 13.9 +/- 9.2  | 0.2 +/- 0.1    |
| M | 77  | Alkamides | BJN-GCMS-alkamides-16.115-2092.4                     | 16.5 +/- 4.6 | 8.9 +/- 1.6   | 50.3 +/- 12 | 31.7 +/- 6.2 | 32.3 +/- 5  | 24.4 +/- 7.3 | 105.3 +/- 31.8 | 90.7 +/- 35  | 68.9 +/- 31.1 | 51.4 +/- 11.8 | 1.1 +/- 0.3  | 1.8 +/- 1.6   | 15.1 +/- 8.7   |
| N | 78  | Alkamides | BJN-GCMS-alkamides-16.289-2097.9                     | 0.1 +/- 0    | 1.9 +/- 1.2   | 0.1 +/- 0   | 0.2 +/- 0    | 0.1 +/- 0   | 0.8 +/- 0.7  | 0.3 +/- 0.2    | 0.2 +/- 0.1  | 0.3 +/- 0.2   | 0.1 +/- 0     | 0.1 +/- 0    | 1 +/- 0.7     | 0.2 +/- 0.1    |
| P | 79  | Alkamides | BJN-GCMS-alkamides-16.305-2098.4                     | 0.1 +/- 0    | 2.5 +/- 2.4   | 0.4 +/- 0.3 | 0.4 +/- 0.3  | 0.1 +/- 0   | 0.2 +/- 0    | 2.4 +/- 2.4    | 0.2 +/- 0.1  | 1.5 +/- 0.7   | 0.1 +/- 0     | 5.3 +/- 0.7  | 1.6 +/- 1.3   | 0.2 +/- 0.1    |
| N | 80  | Alkamides | BJN-GCMS-alkamides-16.373-2100.6                     | 0.3 +/- 0.1  | 2.2 +/- 2.1   | 1.2 +/- 1   | 0.2 +/- 0    | 0.6 +/- 0.5 | 0.2 +/- 0    | 0.3 +/- 0.2    | 0.2 +/- 0.1  | 0.1 +/- 0     | 0.1 +/- 0     | 0.1 +/- 0    | 0.3 +/- 0.1   | 0.2 +/- 0.1    |
| K | 81  | Alkamides | BJN-GCMS-alkamides-16.411-2101.8                     | 0.1 +/- 0    | 0.1 +/- 0     | 0.5 +/- 0.4 | 0.2 +/- 0    | 0.1 +/- 0   | 0.2 +/- 0    | 2.4 +/- 1.5    | 8.3 +/- 5.2  | 34.6 +/- 20.9 | 1.1 +/- 0.7   | 0.1 +/- 0    | 0.3 +/- 0.1   | 0.2 +/- 0.1    |
| U | 82  | Alkamides | BJN-GCMS-alkamides-16.455-2103.2 (Possible alkamide) | 0.1 +/- 0    | 0.1 +/- 0     | 0.1 +/- 0   | 0.2 +/- 0    | 0.1 +/- 0   | 0.2 +/- 0    | 0.1 +/- 0      | 0.2 +/- 0.1  | 0.1 +/- 0     | 1.9 +/- 1.7   | 2.9 +/- 1.2  | 19.6 +/- 8.9  | 153.3 +/- 49.2 |
| H | 83  | Alkamides | BJN-GCMS-alkamides-16.531-2105.6                     | 3.3 +/- 1.9  | 0.1 +/- 0     | 2 +/- 1.3   | 4.8 +/- 3.3  | 3.1 +/- 1.9 | 0.7 +/- 0.6  | 3.7 +/- 0.7    | 0.2 +/- 0.1  | 4.6 +/- 2.3   | 0.1 +/- 0     | 0.4 +/- 0.3  | 0.3 +/- 0.1   | 0.2 +/- 0.1    |
| Q | 84  | Alkamides | BJN-GCMS-alkamides-16.973-2119.1                     | 0.1 +/- 0    | 0.8 +/- 0.6   | 0.1 +/- 0   | 0.2 +/- 0    | 0.1 +/- 0   | 0.2 +/- 0    | 0.1 +/- 0      | 0.2 +/- 0.1  | 0.1 +/- 0     | 0.1 +/- 0     | 0.7 +/- 0.4  | 17.7 +/- 11   | 0.2 +/- 0.1    |
| U | 85  | Alkamides | BJN-GCMS-alkamides-17.157-2124.6                     | 0.1 +/- 0    | 0.1 +/- 0     | 0.1 +/- 0   | 0.2 +/- 0    | 0.1 +/- 0   | 0.2 +/- 0    | 0.1 +/- 0      | 0.2 +/- 0.1  | 0.1 +/- 0     | 0.1 +/- 0     | 0.1 +/- 0    | 0.3 +/- 0.1   | 5.6 +/- 4.1    |
| A | 86  | Alkamides | BJN-GCMS-alkamides-17.286-2128.5 (Possible alkamide) | 1.8 +/- 1.1  | 0.1 +/- 0     | 0.3 +/- 0.2 | 0.2 +/- 0    | 1 +/- 0.6   | 0.2 +/- 0    | 0.1 +/- 0      | 0.2 +/- 0.1  | 0.1 +/- 0     | 0.1 +/- 0     | 0.1 +/- 0    | 0.3 +/- 0.1   | 0.8 +/- 0.6    |
| O | 87  | Alkamides | BJN-GCMS-alkamides-17.354-2130.5                     | 0.1 +/- 0    | 5.2 +/- 4.2   | 0.3 +/- 0.1 | 1.6 +/- 1.4  | 0.5 +/- 0.4 | 0.2 +/- 0    | 0.5 +/- 0.3    | 0.5 +/- 0.3  | 3.8 +/- 2.3   | 0.1 +/- 0     | 0.1 +/- 0    | 0.8 +/- 0.5   | 3 +/- 1.9      |
| Q | 88  | Alkamides | BJN-GCMS-alkamides-17.433-2132.8                     | 0.1 +/- 0    | 0.1 +/- 0     | 1.8 +/- 1.7 | 0.9 +/- 0.8  | 1.1 +/- 1   | 0.2 +/- 0    | 0.1 +/- 0      | 0.5 +/- 0.3  | 2.2 +/- 2.1   | 0.1 +/- 0     | 0.7 +/- 0.5  | 11.1 +/- 7.3  | 0.2 +/- 0.1    |
| K | 89  | Alkamides | BJN-GCMS-alkamides-17.485-2134.3                     | 0.1 +/- 0    | 0.1 +/- 0     | 0.1 +/- 0   | 0.2 +/- 0    | 0.1 +/- 0   | 0.2 +/- 0    | 1 +/- 0.7      | 0.3 +/- 0.1  | 2.8 +/- 2.7   | 0.1 +/- 0     | 0.1 +/- 0    | 0.6 +/- 0.4   | 0.2 +/- 0.1    |
| L | 90  | Alkamides | BJN-GCMS-alkamides-17.521-2135.4                     | 0.1 +/- 0    | 0.1 +/- 0     | 0.1 +/- 0   | 0.2 +/- 0    | 0.1 +/- 0   | 0.2 +/- 0    | 0.1 +/- 0      | 0.2 +/- 0.1  | 1.8 +/- 1.7   | 0.1 +/- 0     | 0.1 +/- 0    | 1.4 +/- 1.1   | 0.2 +/- 0.1    |
| B | 91  | Alkamides | BJN-GCMS-alkamides-17.576-2138.2                     | 0.7 +/- 0.6  | 0.9 +/- 0.8   | 6.2 +/- 1.7 | 1.3 +/- 0.3  | 2 +/- 0.7   | 0.4 +/- 0.3  | 0.1 +/- 0      | 0.2 +/- 0.1  | 0.1 +/- 0     | 0.1 +/- 0     | 0.1 +/- 0    | 2.4 +/- 1.8   | 0.2 +/- 0.1    |
| M | 92  | Alkamides | BJN-GCMS-alkamides-17.792-2143.3                     | 0.1 +/- 0    | 0.1 +/- 0     | 0.1 +/- 0   | 0.2 +/- 0    | 0.1 +/- 0   | 0.2 +/- 0    | 5.2 +/- 3.4    | 0.9 +/- 0.6  | 1.6 +/- 1.5   | 0.8 +/- 0.7   | 0.1 +/- 0    | 0.3 +/- 0.1   | 0.2 +/- 0.1    |
| N | 93  | Alkamides | BJN-GCMS-alkamides-17.84-2144.7                      | 0.1 +/- 0    | 59.4 +/- 18.6 | 0.1 +/- 0   | 0.2 +/- 0    | 0.1 +/- 0   | 0.2 +/- 0    | 0.1 +/- 0      | 4.4 +/- 3    | 3.2 +/- 3.2   | 0.7 +/- 0.5   | 0.1 +/- 0    | 0.3 +/- 0.1   | 7.5 +/- 6.3    |
| U | 94  | Alkamides | BJN-GCMS-alkamides-18.111-2152.4 (Possible alkamide) | 0.1 +/- 0    | 0.1 +/- 0     | 0.1 +/- 0   | 0.2 +/- 0    | 0.1 +/- 0   | 0.2 +/- 0    | 2.2 +/- 1.2    | 0.5 +/- 0.3  | 3.9 +/- 0.9   | 3 +/- 1.6     | 7.7 +/- 0.9  | 30.9 +/- 10.5 | 183 +/- 36.7   |
| N | 95  | Alkamides | BJN-GCMS-alkamides-18.213-2155.5                     | 5.2 +/- 1.7  | 13.6 +/- 8.7  | 6.9 +/- 2.2 | 5 +/- 2      | 5.4 +/- 0.8 | 8.4 +/- 1.4  | 0.1 +/- 0      | 0.2 +/- 0.1  | 0.1 +/- 0     | 0.1 +/- 0     | 0.1 +/- 0    | 0.3 +/- 0.1   | 0.2 +/- 0.1    |
| U | 96  | Alkamides | BJN-GCMS-alkamides-18.249-2156.3 (Possible alkamide) | 0.1 +/- 0    | 0.1 +/- 0     | 0.1 +/- 0   | 0.2 +/- 0    | 0.1 +/- 0   | 0.3 +/- 0.2  | 0.1 +/- 0      | 0.2 +/- 0.1  | 0.1 +/- 0     | 0.1 +/- 0     | 0.3 +/- 0.2  | 1.1 +/- 0.7   | 8.1 +/- 2.5    |
| U | 97  | Alkamides | BJN-GCMS-alkamides-18.403-2160.6                     | 0.1 +/- 0    | 0.1 +/- 0     | 0.1 +/- 0   | 0.2 +/- 0    | 0.1 +/- 0   | 0.4 +/- 0.2  | 2.1 +/- 1.3    | 2.2 +/- 1.2  | 0.6 +/- 0.3   | 1.5 +/- 1.2   | 0.1 +/- 0    | 0.3 +/- 0.1   | 13 +/- 10.5    |
| N | 98  | Alkamides | BJN-GCMS-alkamides-18.77-2170.7                      | 0.1 +/- 0    | 21.4 +/- 4.4  | 0.2 +/- 0.1 | 0.2 +/- 0    | 0.1 +/- 0   | 0.2 +/- 0    | 0.1 +/- 0      | 0.2 +/- 0.1  | 0.3 +/- 0.2   | 0.1 +/- 0     | 0.1 +/- 0    | 0.3 +/- 0.1   | 0.2 +/- 0.1    |
| U | 99  | Alkamides | BJN-GCMS-alkamides-19.151-2181.1 (Possible alkamide) | 0.1 +/- 0    | 0.1 +/- 0     | 0.1 +/- 0   | 0.2 +/- 0    | 0.1 +/- 0   | 0.2 +/- 0    | 0.1 +/- 0      | 0.2 +/- 0.1  | 0.1 +/- 0     | 0.1 +/- 0     | 0.2 +/- 0.1  | 1.4 +/- 1.2   | 3.3 +/- 2      |
| I | 100 | Alkamides | BJN-GCMS-alkamides-19.704-2195.7                     | 0.1 +/- 0    | 0.1 +/- 0     | 0.1 +/- 0   | 0.2 +/- 0    | 0.1 +/- 0   | 0.2 +/- 0    | 0.1 +/- 0      | 0.2 +/- 0.1  | 0.1 +/- 0     | 0.1 +/- 0     | 0.1 +/- 0    | 0.3 +/- 0.1   | 0.2 +/- 0.1    |
| U | 101 | Alkamides | BJN-GCMS-alkamides-19.872-2200.0 (Possible alkamide) | 0.1 +/- 0    | 56.2 +/- 15.7 | 0.1 +/- 0   | 0.2 +/- 0    | 0.1 +/- 0   | 0.2 +/- 0    | 2.7 +/- 2.2    | 16.1 +/- 4.9 | 2.6 +/- 0.8   | 9.9 +/- 9.8   | 0.1 +/- 0    | 0.3 +/- 0.1   | 163.8 +/- 58.8 |
| U | 102 | Alkamides | BJN-GCMS-alkamides-20.354-2212.4                     | 0.1 +/- 0    | 3.1 +/- 2.9   | 0.1 +/- 0   | 0.2 +/- 0    | 0.1 +/- 0   | 0.2 +/- 0    | 0.1 +/- 0      | 0.3 +/- 0.1  | 0.1 +/- 0     | 0.2 +/- 0.1   | 0.1 +/- 0    | 0.3 +/- 0.1   | 18.3 +/- 13.9  |
| R | 103 | Alkamides | BJN-GCMS-alkamides-20.556-2217.5 (Possible alkamide) | 0.1 +/- 0    | 0.1 +/- 0     | 0.1 +/- 0   | 1.3 +/- 1.2  | 0.1 +/- 0   | 0.5 +/- 0.4  | 0.1 +/- 0      | 0.3 +/- 0.1  | 0.1 +/- 0     | 0.2 +/- 0.1   | 0.1 +/- 0    | 11.1 +/- 10.7 | 11.7 +/- 7.6   |
| O | 104 | Alkamides | BJN-GCMS-alkamides-20.619-2219.1 (Possible alkamide) | 0.1 +/- 0    | 18.9 +/- 7.4  | 0.1 +/- 0   | 0.2 +/- 0    | 0.1 +/- 0   | 0.2 +/- 0    | 12.1 +/- 11.5  | 0.2 +/- 0.1  | 3.9 +/- 0.9   | 0.9 +/- 0.7   | 0.1 +/- 0    | 0.3 +/- 0.1   | 7.3 +/- 6.2    |
| U | 105 | Alkamides | BJN-GCMS-alkamides-20.98-2228.0 (Possible alkamide)  | 0.1 +/- 0    | 2.6 +/- 1.3   | 0.1 +/- 0   | 0.2 +/- 0    | 0.1 +/- 0   | 0.2 +/- 0    | 0.1 +/- 0      | 0.2 +/- 0.1  | 1.1 +/- 0.6   | 0.1 +/- 0     | 0.1 +/- 0    | 0.3 +/- 0.1   | 9.1 +/- 2.6    |
| K | 106 | Alkamides | BJN-GCMS-alkamides-21.021-2229.1                     | 0.1 +/- 0    | 0.1 +/- 0     | 0.1 +/- 0   | 0.2 +/- 0    | 0.1 +/- 0   | 0.2 +/- 0    | 2.4 +/- 2.4    | 0.2 +/- 0.1  | 2.6 +/- 0.8   | 0.1 +/- 0     | 0.1 +/- 0    | 0.3 +/- 0.1   | 0.2 +/- 0.1    |
| K | 107 | Alkamides | BJN-GCMS-alkamides-21.051-2229.7                     | 0.1 +/- 0    | 0.1 +/- 0     | 0.1 +/- 0   | 0.2 +/- 0    | 0.1 +/- 0   | 0.2 +/- 0    | 0.1 +/- 0      | 0.2 +/- 0.1  | 1.5 +/- 0.5   | 0.1 +/- 0     | 0.1 +/- 0    | 0.3 +/- 0.1   | 0.2 +/- 0.1    |
| N | 108 | Alkamides | BJN-GCMS-alkamides-21.343-2236.9                     | 0.1 +/- 0    | 44.6 +/- 14.8 | 0.1 +/- 0   | 0.2 +/- 0    | 0.1 +/- 0   | 0.2 +/- 0    | 0.5 +/- 0.4    | 0.2 +/- 0.1  | 0.1 +/- 0     | 0.1 +/- 0     | 0.1 +/- 0    | 0.3 +/- 0.1   | 0.2 +/- 0.1    |
| T | 109 | Alkamides | BJN-GCMS-alkamides-21.919-2250.6                     | 0.8 +/- 0.7  | 0.1 +/- 0     | 0.8 +/- 0.5 | 3 +/- 2.5    | 1.4 +/- 1.3 | 2.9 +/- 1.2  | 0.1 +/- 0      | 1 +/- 0.8    | 0.1 +/- 0     | 0.1 +/- 0     | 1 +/- 0.5    | 2 +/- 1.3     | 3.2 +/- 3.1    |
| S | 110 | Alkamides | BJN-GCMS-alkamides-22.409-2262.0                     | 0.1 +/- 0    | 0.1 +/- 0     | 0.1 +/- 0   | 0.2 +/- 0    | 0.1 +/- 0   | 0.2 +/- 0    | 1.3 +/- 1.2    | 0.2 +/- 0.1  | 2.4 +/- 2.3   | 0.1 +/- 0     | 0.1 +/- 0    | 0.3 +/- 0.1   | 4 +/- 3.9      |
| U | 111 | Alkamides | BJN-GCMS-alkamides-22.422-2262.4                     | 0.1 +/- 0    | 0.1 +/- 0     | 0.1 +/- 0   | 0.2 +/- 0    | 0.1 +/- 0   | 0.2 +/- 0    | 0.1 +/- 0      | 6.6 +/- 6.3  | 0.1 +/- 0     | 0.1 +/- 0     | 0.1 +/- 0    | 0.3 +/- 0.1   | 18.4 +/- 18.2  |
| U | 112 | Alkamides | BJN-GCMS-alkamides-22.495-2264.0                     | 1.5 +/- 0.7  | 0.1 +/- 0     | 2 +/- 0.8   | 7.3 +/- 2    | 1.8 +/- 0.8 | 15.4 +/- 2.5 | 1 +/- 0.8      | 2 +/- 1.1    | 0.9 +/- 0.6   | 8.2 +/- 8.1   | 0.6 +/- 0.3  | 6 +/- 5.7     | 43.8 +/- 17.2  |
| K | 113 | Alkamides | BJN-GCMS-alkamides-22.605-2266.5                     | 0.1 +/- 0    | 0.1 +/- 0     | 0.1 +/- 0   | 0.2 +/- 0    | 0.1 +/- 0   | 0.2 +/- 0    | 0.1 +/- 0      | 0.2 +/- 0.1  | 1.2 +/- 1     | 0.1 +/- 0     | 0.1 +/- 0    | 0.3 +/- 0.1   | 0.2 +/- 0.1    |

|   |     |           |                                                       |             |             |             |             |             |             |             |             |             |             |             |               |                |             |
|---|-----|-----------|-------------------------------------------------------|-------------|-------------|-------------|-------------|-------------|-------------|-------------|-------------|-------------|-------------|-------------|---------------|----------------|-------------|
| N | 114 | Alkamides | BJN-GCMS-alkamides-22.677-2268.2                      | 0.1 +/- 0   | 24 +/- 7.7  | 0.1 +/- 0   | 0.2 +/- 0   | 0.1 +/- 0   | 0.2 +/- 0   | 0.6 +/- 0.5 | 0.2 +/- 0.1 | 0.1 +/- 0   | 0.1 +/- 0   | 0.1 +/- 0   | 0.3 +/- 0.1   | 3.5 +/- 3.3    |             |
| M | 115 | Alkamides | BJN-GCMS-alkamides-22.715-2269.1                      | 0.1 +/- 0   | 0.1 +/- 0   | 0.1 +/- 0   | 0.2 +/- 0   | 0.1 +/- 0   | 0.2 +/- 0   | 0.9 +/- 0.6 | 0.2 +/- 0.1 | 0.5 +/- 0.4 | 0.1 +/- 0   | 0.1 +/- 0   | 0.3 +/- 0.1   | 0.2 +/- 0.1    |             |
| U | 116 | Alkamides | BJN-GCMS-alkamides-22.86-2272.3                       | 0.1 +/- 0   | 0.1 +/- 0   | 0.1 +/- 0   | 0.2 +/- 0   | 0.1 +/- 0   | 0.2 +/- 0   | 0.4 +/- 0.3 | 0.2 +/- 0.1 | 0.2 +/- 0.1 | 0.1 +/- 0   | 0.1 +/- 0   | 0.3 +/- 0.1   | 7.1 +/- 6.9    |             |
| R | 117 | Alkamides | BJN-GCMS-alkamides-23.079-2277.3                      | 0.1 +/- 0   | 0.1 +/- 0   | 0.1 +/- 0   | 0.3 +/- 0.2 | 0.1 +/- 0   | 0.2 +/- 0   | 0.1 +/- 0   | 0.2 +/- 0.1 | 0.1 +/- 0   | 0.1 +/- 0   | 1.3 +/- 1.2 | 9.1 +/- 8.3   | 5.4 +/- 3.7    |             |
| Q | 118 | Alkamides | BJN-GCMS-alkamides-23.142-2278.7                      | 0.1 +/- 0   | 0.1 +/- 0   | 0.1 +/- 0   | 0.2 +/- 0   | 0.1 +/- 0   | 0.2 +/- 0   | 0.1 +/- 0   | 0.2 +/- 0.1 | 0.3 +/- 0.2 | 0.1 +/- 0   | 3.5 +/- 2.9 | 13.7 +/- 10.5 | 0.2 +/- 0.1    |             |
| K | 119 | Alkamides | BJN-GCMS-alkamides-23.225-2280.5                      | 0.1 +/- 0   | 0.1 +/- 0   | 0.1 +/- 0   | 0.2 +/- 0   | 0.1 +/- 0   | 0.2 +/- 0   | 1.5 +/- 1.5 | 0.2 +/- 0.1 | 1.1 +/- 0.6 | 0.1 +/- 0   | 0.1 +/- 0   | 0.3 +/- 0.1   | 0.2 +/- 0.1    |             |
| U | 120 | Alkamides | BJN-GCMS-alkamides-23.3-2282.2                        | 0.1 +/- 0   | 0.1 +/- 0   | 0.1 +/- 0   | 0.2 +/- 0   | 0.1 +/- 0   | 0.2 +/- 0   | 0.1 +/- 0   | 0.2 +/- 0.1 | 0.1 +/- 0   | 0.1 +/- 0   | 0.1 +/- 0   | 0.3 +/- 0.1   | 4.2 +/- 2.3    |             |
| I | 121 | Alkamides | BJN-GCMS-alkamides-23.36-2283.5                       | 0.1 +/- 0   | 0.1 +/- 0   | 0.1 +/- 0   | 0.2 +/- 0   | 0.1 +/- 0   | 0.2 +/- 0   | 0.1 +/- 0   | 0.2 +/- 0.1 | 0.2 +/- 0.1 | 0.1 +/- 0   | 0.1 +/- 0   | 0.3 +/- 0.1   | 0.2 +/- 0.1    |             |
| I | 122 | Alkamides | BJN-GCMS-alkamides-23.616-2289.2                      | 0.1 +/- 0   | 0.1 +/- 0   | 0.1 +/- 0   | 0.2 +/- 0   | 0.1 +/- 0   | 0.2 +/- 0   | 0.1 +/- 0   | 0.2 +/- 0.1 | 0.3 +/- 0.2 | 0.1 +/- 0   | 0.1 +/- 0   | 0.3 +/- 0.1   | 0.6 +/- 0.4    |             |
| U | 123 | Alkamides | BJN-GCMS-alkamides-23.882-2294.9                      | 0.1 +/- 0   | 0.1 +/- 0   | 0.1 +/- 0   | 0.2 +/- 0   | 0.2 +/- 0.1 | 0.2 +/- 0   | 0.1 +/- 0   | 0.4 +/- 0.2 | 1 +/- 0.6   | 0.1 +/- 0   | 0.1 +/- 0   | 0.3 +/- 0.1   | 5.8 +/- 2.8    |             |
| E | 124 | Alkamides | BJN-GCMS-alkamides-23.928-2295.9                      | 0.1 +/- 0   | 0.1 +/- 0   | 0.1 +/- 0   | 0.2 +/- 0   | 0.1 +/- 0   | 0.2 +/- 0   | 0.2 +/- 0.1 | 0.2 +/- 0.1 | 0.3 +/- 0.2 | 1.6 +/- 1.4 | 0.1 +/- 0   | 0.3 +/- 0.1   | 0.8 +/- 0.6    |             |
| Q | 125 | Alkamides | BJN-GCMS-alkamides-24.136-2300.4                      | 3.5 +/- 3.3 | 0.1 +/- 0   | 0.1 +/- 0   | 4 +/- 3.4   | 3.7 +/- 2.3 | 1.8 +/- 1.2 | 0.1 +/- 0   | 0.2 +/- 0.1 | 0.5 +/- 0.3 | 0.1 +/- 0   | 0.5 +/- 0.4 | 21.8 +/- 15.8 | 0.2 +/- 0.1    |             |
| I | 126 | Alkamides | BJN-GCMS-alkamides-24.176-2301.2                      | 0.1 +/- 0   | 0.1 +/- 0   | 0.1 +/- 0   | 0.2 +/- 0   | 0.1 +/- 0   | 0.2 +/- 0   | 0.1 +/- 0   | 0.2 +/- 0.1 | 0.3 +/- 0.1 | 0.1 +/- 0   | 0.1 +/- 0   | 0.3 +/- 0.1   | 0.2 +/- 0.1    |             |
| I | 127 | Alkamides | BJN-GCMS-alkamides-24.211-2302.0                      | 0.1 +/- 0   | 0.1 +/- 0   | 0.1 +/- 0   | 0.2 +/- 0   | 0.1 +/- 0   | 0.2 +/- 0   | 0.1 +/- 0   | 0.2 +/- 0.1 | 0.3 +/- 0.2 | 0.1 +/- 0   | 0.1 +/- 0   | 0.3 +/- 0.1   | 0.2 +/- 0.1    |             |
| S | 128 | Alkamides | BJN-GCMS-alkamides-24.267-2303.2                      | 0.1 +/- 0   | 0.1 +/- 0   | 0.1 +/- 0   | 0.2 +/- 0   | 0.1 +/- 0   | 0.2 +/- 0   | 1.1 +/- 1.1 | 0.2 +/- 0.1 | 0.7 +/- 0.4 | 0.1 +/- 0   | 0.1 +/- 0   | 0.3 +/- 0.1   | 1.3 +/- 0.9    |             |
| E | 129 | Alkamides | BJN-GCMS-alkamides-24.317-2304.3                      | 0.1 +/- 0   | 0.1 +/- 0   | 0.1 +/- 0   | 0.2 +/- 0   | 0.1 +/- 0   | 0.2 +/- 0   | 0.1 +/- 0   | 0.2 +/- 0.1 | 0.1 +/- 0   | 1.2 +/- 1.1 | 0.1 +/- 0   | 0.3 +/- 0.1   | 1.7 +/- 1      |             |
| I | 130 | Alkamides | BJN-GCMS-alkamides-24.364-2305.3                      | 0.1 +/- 0   | 0.1 +/- 0   | 0.1 +/- 0   | 0.2 +/- 0   | 0.1 +/- 0   | 0.2 +/- 0   | 0.1 +/- 0   | 0.2 +/- 0.1 | 0.3 +/- 0.2 | 0.3 +/- 0.2 | 0.1 +/- 0   | 0.3 +/- 0.1   | 0.2 +/- 0.1    |             |
| Q | 131 | Alkamides | BJN-GCMS-alkamides-26.252-2343.8                      | 0.1 +/- 0   | 0.1 +/- 0   | 0.1 +/- 0   | 0.4 +/- 0.3 | 0.1 +/- 0   | 0.2 +/- 0   | 0.1 +/- 0   | 0.2 +/- 0.1 | 0.1 +/- 0   | 0.1 +/- 0   | 0.4 +/- 0.3 | 8.8 +/- 8.4   | 2.2 +/- 1.3    |             |
| A | 132 | Alkamides | BJN-GCMS-alkamides-26.613-2350.9                      | 1.1 +/- 0.9 | 0.1 +/- 0   | 0.1 +/- 0   | 1.4 +/- 1.2 | 0.5 +/- 0.3 | 0.2 +/- 0   | 0.1 +/- 0.1 | 0.2 +/- 0.1 | 0.1 +/- 0   | 0.1 +/- 0   | 0.1 +/- 0   | 0.3 +/- 0.1   | 0.2 +/- 0.1    |             |
| Q | 133 | Alkamides | BJN-GCMS-alkamides-26.651-2351.6 (Possible alkamide ) | 0.3 +/- 0.2 | 0.1 +/- 0   | 0.1 +/- 0   | 0.3 +/- 0.1 | 0.1 +/- 0   | 0.2 +/- 0   | 0.1 +/- 0   | 0.2 +/- 0.1 | 0.1 +/- 0   | 0.1 +/- 0   | 0.1 +/- 0   | 1.4 +/- 1.1   | 0.2 +/- 0.1    |             |
| I | 134 | Alkamides | BJN-GCMS-alkamides-26.697-2352.5                      | 0.1 +/- 0   | 0.1 +/- 0   | 0.1 +/- 0   | 0.2 +/- 0   | 0.1 +/- 0   | 0.2 +/- 0   | 0.1 +/- 0   | 0.2 +/- 0.1 | 0.1 +/- 0   | 0.1 +/- 0   | 0.1 +/- 0   | 0.3 +/- 0.1   | 0.2 +/- 0.1    |             |
| U | 135 | Alkamides | BJN-GCMS-alkamides-26.779-2354.1                      | 0.1 +/- 0   | 0.1 +/- 0   | 0.1 +/- 0   | 0.2 +/- 0   | 0.1 +/- 0   | 0.2 +/- 0   | 0.1 +/- 0.1 | 0.2 +/- 0.1 | 0.1 +/- 0   | 0.1 +/- 0   | 0.1 +/- 0   | 0.3 +/- 0.1   | 2.9 +/- 2.4    |             |
| I | 136 | Alkamides | BJN-GCMS-alkamides-26.877-2355.9                      | 0.1 +/- 0   | 0.1 +/- 0   | 0.1 +/- 0   | 0.2 +/- 0   | 0.1 +/- 0   | 0.2 +/- 0   | 0.1 +/- 0   | 0.2 +/- 0.1 | 0.2 +/- 0.1 | 0.1 +/- 0   | 0.1 +/- 0   | 0.3 +/- 0.1   | 0.2 +/- 0.1    |             |
| K | 137 | Alkamides | BJN-GCMS-alkamides-26.933-2357.0                      | 0.1 +/- 0   | 0.1 +/- 0   | 0.1 +/- 0   | 0.2 +/- 0   | 0.1 +/- 0   | 0.2 +/- 0   | 0.1 +/- 0   | 0.2 +/- 0.1 | 2 +/- 1.1   | 0.1 +/- 0   | 0.1 +/- 0   | 0.3 +/- 0.1   | 0.3 +/- 0.1    |             |
| I | 138 | Alkamides | BJN-GCMS-alkamides-26.974-2357.8                      | 0.1 +/- 0   | 0.1 +/- 0   | 0.1 +/- 0   | 0.2 +/- 0   | 0.1 +/- 0   | 0.2 +/- 0   | 0.1 +/- 0   | 0.2 +/- 0.1 | 0.2 +/- 0.1 | 0.1 +/- 0   | 0.1 +/- 0   | 0.3 +/- 0.1   | 0.5 +/- 0.3    |             |
| I | 139 | Alkamides | BJN-GCMS-alkamides-27.074-2359.7                      | 0.1 +/- 0   | 0.1 +/- 0   | 0.1 +/- 0   | 0.2 +/- 0   | 0.1 +/- 0   | 0.2 +/- 0   | 0.2 +/- 0.1 | 0.2 +/- 0.1 | 0.1 +/- 0   | 0.1 +/- 0   | 0.1 +/- 0   | 0.3 +/- 0.1   | 0.2 +/- 0.1    |             |
| K | 140 | Alkamides | BJN-GCMS-alkamides-28.02-2377.4                       | 0.1 +/- 0   | 0.1 +/- 0   | 0.1 +/- 0   | 0.2 +/- 0   | 0.1 +/- 0   | 0.2 +/- 0   | 3.4 +/- 3.3 | 2.3 +/- 1.7 | 3.1 +/- 2.9 | 0.6 +/- 0.3 | 0.1 +/- 0   | 0.3 +/- 0.1   | 0.2 +/- 0.1    |             |
| U | 141 | Alkamides | BJN-GCMS-alkamides-28.078-2378.5 (Possible alkamide ) | 0.2 +/- 0.1 | 4.3 +/- 1.8 | 0.3 +/- 0.2 | 0.2 +/- 0   | 0.1 +/- 0   | 0.2 +/- 0   | 0.1 +/- 0.1 | 0.2 +/- 0.1 | 0.1 +/- 0   | 0.1 +/- 0   | 0.1 +/- 0   | 1.3 +/- 0.7   | 146.3 +/- 43.4 |             |
| L | 142 | Alkamides | BJN-GCMS-alkamides-28.102-2378.9                      | 0.1 +/- 0   | 1.3 +/- 0.9 | 0.1 +/- 0   | 0.2 +/- 0   | 0.3 +/- 0.2 | 0.2 +/- 0.1 | 1.1 +/- 0.8 | 0.2 +/- 0.1 | 1.7 +/- 1   | 0.1 +/- 0   | 0.4 +/- 0.3 | 3.6 +/- 3.1   | 0.2 +/- 0.1    |             |
| Q | 143 | Alkamides | BJN-GCMS-alkamides-28.157-2379.9                      | 0.7 +/- 0.6 | 0.8 +/- 0.7 | 0.7 +/- 0.5 | 0.4 +/- 0.3 | 0.1 +/- 0   | 0.2 +/- 0   | 0.1 +/- 0   | 0.2 +/- 0.1 | 0.8 +/- 0.5 | 0.3 +/- 0.1 | 0.1 +/- 0   | 5 +/- 4.1     | 0.2 +/- 0.1    |             |
| S | 144 | Alkamides | BJN-GCMS-alkamides-28.207-2380.9                      | 0.1 +/- 0   | 0.1 +/- 0   | 0.1 +/- 0   | 0.2 +/- 0   | 0.1 +/- 0   | 0.5 +/- 0.3 | 1.1 +/- 1   | 0.2 +/- 0.1 | 0.1 +/- 0   | 0.1 +/- 0   | 0.1 +/- 0   | 0.3 +/- 0.1   | 0.8 +/- 0.6    |             |
| D | 145 | Alkamides | BJN-GCMS-alkamides-28.255-2381.8                      | 0.1 +/- 0   | 0.1 +/- 0   | 0.1 +/- 0   | 6.6 +/- 6.4 | 0.2 +/- 0.1 | 0.2 +/- 0   | 0.1 +/- 0   | 0.1 +/- 0   | 1.5 +/- 1   | 1.3 +/- 0.7 | 0.1 +/- 0   | 0.3 +/- 0.2   | 1.7 +/- 1.5    | 0.4 +/- 0.3 |
| Q | 146 | Alkamides | BJN-GCMS-alkamides-28.297-2382.5                      | 2.4 +/- 2.3 | 0.1 +/- 0   | 0.1 +/- 0   | 0.2 +/- 0   | 0.1 +/- 0   | 0.2 +/- 0   | 0.6 +/- 0.5 | 0.2 +/- 0.1 | 0.1 +/- 0   | 0.1 +/- 0   | 0.1 +/- 0   | 11.5 +/- 11.2 | 3.2 +/- 2.7    |             |
| U | 147 | Alkamides | BJN-GCMS-alkamides-28.343-2383.4                      | 0.1 +/- 0   | 0.1 +/- 0   | 0.1 +/- 0   | 0.2 +/- 0   | 0.9 +/- 0.8 | 0.2 +/- 0   | 0.8 +/- 0.7 | 0.6 +/- 0.3 | 0.1 +/- 0   | 0.1 +/- 0   | 0.2 +/- 0.1 | 0.6 +/- 0.4   | 2.7 +/- 2.5    |             |
| U | 148 | Alkamides | BJN-GCMS-alkamides-28.38-2384.1                       | 0.1 +/- 0   | 0.1 +/- 0   | 0.1 +/- 0   | 0.2 +/- 0   | 0.1 +/- 0   | 0.4 +/- 0.2 | 0.2 +/- 0.2 | 0.2 +/- 0.1 | 0.1 +/- 0   | 0.1 +/- 0   | 0.1 +/- 0   | 0.3 +/- 0.1   | 2.7 +/- 2.5    |             |
| I | 149 | Alkamides | BJN-GCMS-alkamides-28.471-2385.7                      | 0.1 +/- 0   | 0.1 +/- 0   | 0.1 +/- 0   | 0.2 +/- 0   | 0.3 +/- 0.2 | 0.2 +/- 0   | 0.1 +/- 0   | 0.2 +/- 0.1 | 0.5 +/- 0.4 | 0.1 +/- 0   | 0.1 +/- 0   | 0.3 +/- 0.1   | 0.3 +/- 0.1    |             |
| D | 150 | Alkamides | BJN-GCMS-alkamides-28.523-2386.7                      | 1.3 +/- 0.8 | 0.1 +/- 0   | 0.1 +/- 0   | 4 +/- 3.8   | 0.1 +/- 0   | 0.2 +/- 0   | 1.3 +/- 1.2 | 1.5 +/- 1.2 | 0.4 +/- 0.3 | 0.1 +/- 0   | 0.4 +/- 0.2 | 0.5 +/- 0.2   | 0.2 +/- 0.1    |             |
| U | 151 | Alkamides | BJN-GCMS-alkamides-28.57-2387.5 (Possible alkamide )  | 2.2 +/- 2.1 | 0.1 +/- 0   | 0.1 +/- 0   | 0.3 +/- 0.1 | 0.1 +/- 0   | 0.2 +/- 0   | 0.1 +/- 0   | 0.2 +/- 0.1 | 0.1 +/- 0   | 0.1 +/- 0   | 0.4 +/- 0.2 | 2.3 +/- 1.8   | 8.9 +/- 3.9    |             |
| U | 152 | Alkamides | BJN-GCMS-alkamides-28.615-2388.3 (Possible alkamide ) | 0.1 +/- 0   | 0.1 +/- 0   | 0.1 +/- 0   | 0.2 +/- 0   | 0.1 +/- 0   | 0.2 +/- 0   | 0.3 +/- 0.2 | 0.2 +/- 0.1 | 0.7 +/- 0.4 | 0.2 +/- 0.1 | 0.1 +/- 0   | 0.3 +/- 0.1   | 2.2 +/- 1.9    |             |
| U | 153 | Alkamides | BJN-GCMS-alkamides-28.652-2388.9                      | 0.1 +/- 0   | 0.1 +/- 0   | 0.1 +/- 0   | 0.2 +/- 0   | 0.1 +/- 0   | 0.2 +/- 0   | 1.3 +/- 1.2 | 0.2 +/- 0.1 | 0.6 +/- 0.5 | 0.1 +/- 0   | 0.1 +/- 0   | 0.3 +/- 0.1   | 8.3 +/- 4.9    |             |
| U | 154 | Alkamides | BJN-GCMS-alkamides-28.749-2390.7                      | 0.1 +/- 0   | 0.1 +/- 0   | 0.1 +/- 0   | 0.2 +/- 0   | 0.1 +/- 0   | 0.2 +/- 0   | 1.2 +/- 0.8 | 0.2 +/- 0.1 | 0.3 +/- 0.1 | 0.1 +/- 0   | 0.1 +/- 0   | 0.3 +/- 0.1   | 4.2 +/- 4.1    |             |
| K | 155 | Alkamides | BJN-GCMS-alkamides-28.917-2393.7                      | 0.1 +/- 0   | 0.1 +/- 0   | 0.1 +/- 0   | 0.2 +/- 0   | 0.1 +/- 0   | 0.2 +/- 0   | 0.1 +/- 0   | 0.2 +/- 0.1 | 1.6 +/- 1.5 | 0.1 +/- 0   | 0.1 +/- 0   | 0.3 +/- 0.1   | 0.2 +/- 0.1    |             |

|   |     |             |                                                       |                |                |                |                 |                |               |                 |               |               |              |               |                |               |
|---|-----|-------------|-------------------------------------------------------|----------------|----------------|----------------|-----------------|----------------|---------------|-----------------|---------------|---------------|--------------|---------------|----------------|---------------|
| U | 156 | Alkamides   | BJN-GCMS-alkamides-29.002-2395.3                      | 0.1 +/- 0      | 0.1 +/- 0      | 0.1 +/- 0      | 0.2 +/- 0       | 0.1 +/- 0      | 0.2 +/- 0     | 0.1 +/- 0       | 1.1 +/- 0.9   | 0.3 +/- 0.2   | 0.1 +/- 0    | 0.1 +/- 0     | 1.9 +/- 1.1    | 5 +/- 4.9     |
| Q | 157 | Alkamides   | BJN-GCMS-alkamides-29.291-2401.8                      | 11.1 +/- 8.3   | 0.1 +/- 0      | 27.1 +/- 5.1   | 19 +/- 6.9      | 22.1 +/- 7     | 5.9 +/- 1.3   | 3 +/- 1.3       | 1.7 +/- 0.6   | 15 +/- 6.9    | 2 +/- 1.1    | 3 +/- 1.4     | 32.4 +/- 19.7  | 2.8 +/- 1.9   |
| C | 158 | Alkamides   | BJN-GCMS-alkamides-29.62-2429.9                       | 0.1 +/- 0      | 0.1 +/- 0      | 3 +/- 1.4      | 3.5 +/- 3.1     | 0.3 +/- 0.2    | 0.7 +/- 0.3   | 0.1 +/- 0       | 0.3 +/- 0.1   | 2.6 +/- 0.5   | 0.5 +/- 0.4  | 0.1 +/- 0     | 0.3 +/- 0.1    | 0.2 +/- 0.1   |
| R | 159 | Alkamides   | BJN-GCMS-alkamides-29.852-2449.7                      | 0.3 +/- 0.2    | 0.1 +/- 0      | 0.9 +/- 0.8    | 0.3 +/- 0.1     | 0.1 +/- 0      | 0.2 +/- 0     | 2.6 +/- 1.6     | 2.7 +/- 1.7   | 4.3 +/- 2.1   | 1.9 +/- 1.2  | 0.1 +/- 0     | 16.4 +/- 10.4  | 10.7 +/- 7.3  |
| K | 160 | Alkamides   | BJN-GCMS-alkamides-29.947-2457.7                      | 0.2 +/- 0.1    | 0.1 +/- 0      | 0.8 +/- 0.4    | 1.9 +/- 0.5     | 4.1 +/- 2.2    | 0.9 +/- 0.3   | 5.5 +/- 2.6     | 2.8 +/- 0.9   | 10.2 +/- 2.8  | 2 +/- 0.6    | 2.5 +/- 1.3   | 0.3 +/- 0.1    | 0.2 +/- 0.1   |
| D | 161 | Alkamides   | BJN-GCMS-alkamides-30.03-2464.7                       | 0.1 +/- 0      | 0.1 +/- 0      | 0.3 +/- 0.1    | 9.7 +/- 9.2     | 0.1 +/- 0      | 0.2 +/- 0     | 0.9 +/- 0.6     | 1.4 +/- 1     | 5.1 +/- 1.2   | 0.6 +/- 0.4  | 0.1 +/- 0     | 0.6 +/- 0.3    | 3.1 +/- 2.9   |
| U | 162 | Alkamides   | BJN-GCMS-alkamides-30.074-2468.4                      | 9.2 +/- 9.1    | 0.1 +/- 0      | 0.1 +/- 0      | 0.2 +/- 0       | 0.4 +/- 0.3    | 0.6 +/- 0.2   | 0.7 +/- 0.7     | 0.9 +/- 0.5   | 0.1 +/- 0     | 0.1 +/- 0    | 0.1 +/- 0     | 5 +/- 4.8      | 12.6 +/- 6.8  |
| R | 163 | Alkamides   | BJN-GCMS-alkamides-30.237-2482.0                      | 0.1 +/- 0      | 0.1 +/- 0      | 0.1 +/- 0      | 0.2 +/- 0       | 0.1 +/- 0      | 0.4 +/- 0.2   | 2.9 +/- 2.5     | 0.2 +/- 0.1   | 3.9 +/- 2.6   | 0.5 +/- 0.4  | 1.1 +/- 0.9   | 8.6 +/- 8.2    | 5.2 +/- 3.9   |
| Q | 164 | Alkamides   | BJN-GCMS-alkamides-30.281-2485.7                      | 9.8 +/- 9.7    | 0.1 +/- 0      | 0.6 +/- 0.3    | 0.8 +/- 0.6     | 0.4 +/- 0.2    | 0.2 +/- 0     | 0.7 +/- 0.6     | 1.3 +/- 1     | 5.4 +/- 3.2   | 0.8 +/- 0.7  | 0.3 +/- 0.2   | 21.8 +/- 13.8  | 0.2 +/- 0.1   |
| K | 165 | Alkamides   | BJN-GCMS-alkamides-30.359-2492.2                      | 1.1 +/- 1      | 0.1 +/- 0      | 0.1 +/- 0      | 0.2 +/- 0       | 0.1 +/- 0      | 0.4 +/- 0.3   | 5.2 +/- 4.3     | 15.5 +/- 15.2 | 17 +/- 16.9   | 0.1 +/- 0    | 0.4 +/- 0.2   | 0.6 +/- 0.3    | 9.4 +/- 9.3   |
| E | 166 | Alkamides   | BJN-GCMS-alkamides-30.411-2496.5                      | 0.1 +/- 0      | 0.1 +/- 0      | 0.1 +/- 0      | 0.2 +/- 0       | 0.1 +/- 0      | 0.2 +/- 0     | 0.1 +/- 0       | 0.6 +/- 0.4   | 0.1 +/- 0     | 2.9 +/- 2    | 0.1 +/- 0     | 0.3 +/- 0.1    | 0.2 +/- 0.1   |
| U | 167 | Alkamides   | BJN-GCMS-alkamides-30.459-2500.5 (Possible alkamide ) | 4.3 +/- 2.7    | 0.1 +/- 0      | 8.8 +/- 1.2    | 19.9 +/- 13     | 9.6 +/- 3      | 7.1 +/- 1.8   | 3.5 +/- 2.2     | 0.2 +/- 0.1   | 0.1 +/- 0     | 0.1 +/- 0    | 0.2 +/- 0.1   | 18.4 +/- 10.9  | 43.5 +/- 12.2 |
| M | 168 | Alkamides   | BJN-GCMS-alkamides-30.499-2503.8                      | 0.2 +/- 0.1    | 0.1 +/- 0      | 0.1 +/- 0      | 0.2 +/- 0       | 0.1 +/- 0      | 0.2 +/- 0     | 1.4 +/- 1.4     | 0.2 +/- 0.1   | 0.1 +/- 0     | 0.1 +/- 0    | 0.3 +/- 0.2   | 0.3 +/- 0.1    | 0.2 +/- 0.1   |
| L | 169 | Alkamides   | BJN-GCMS-alkamides-30.553-2508.3                      | 0.5 +/- 0.3    | 0.1 +/- 0      | 1.4 +/- 0.8    | 0.9 +/- 0.4     | 0.8 +/- 0.6    | 0.7 +/- 0.6   | 2.9 +/- 1.4     | 3.5 +/- 1.4   | 35 +/- 13.9   | 8.4 +/- 7.6  | 0.3 +/- 0.1   | 17.7 +/- 10.8  | 2.2 +/- 2     |
| Q | 170 | Alkamides   | BJN-GCMS-alkamides-30.677-2518.5                      | 19 +/- 13.3    | 0.1 +/- 0      | 5.8 +/- 2.6    | 14.3 +/- 11.3   | 16.4 +/- 12.7  | 2.6 +/- 2.4   | 9.8 +/- 4.2     | 3.5 +/- 3.4   | 19.2 +/- 10.6 | 5.1 +/- 3.7  | 5.5 +/- 3.6   | 67.4 +/- 40.8  | 19.1 +/- 16.3 |
| S | 171 | Alkamides   | BJN-GCMS-alkamides-30.732-2523.0                      | 0.4 +/- 0.3    | 0.1 +/- 0      | 0.1 +/- 0      | 0.2 +/- 0       | 0.1 +/- 0      | 0.2 +/- 0     | 1.4 +/- 1.3     | 0.9 +/- 0.6   | 0.1 +/- 0     | 0.1 +/- 0    | 0.3 +/- 0.2   | 0.3 +/- 0.1    | 2.8 +/- 1.7   |
| K | 172 | Alkamides   | BJN-GCMS-alkamides-30.77-2526.1                       | 0.2 +/- 0.1    | 0.1 +/- 0      | 0.7 +/- 0.6    | 0.6 +/- 0.4     | 0.5 +/- 0.3    | 0.5 +/- 0.4   | 2 +/- 1.2       | 6 +/- 5.7     | 16.6 +/- 7.9  | 1.8 +/- 1.5  | 0.2 +/- 0.1   | 0.3 +/- 0.1    | 3.3 +/- 3.2   |
| S | 173 | Alkamides   | BJN-GCMS-alkamides-30.809-2529.3                      | 0.1 +/- 0      | 0.1 +/- 0      | 0.1 +/- 0      | 5.8 +/- 5.7     | 0.1 +/- 0      | 0.2 +/- 0     | 7 +/- 4.2       | 0.6 +/- 0.2   | 0.1 +/- 0     | 3.4 +/- 2.2  | 0.4 +/- 0.3   | 0.3 +/- 0.1    | 5 +/- 4       |
| K | 174 | Alkamides   | BJN-GCMS-alkamides-30.853-2532.9                      | 0.8 +/- 0.4    | 0.1 +/- 0      | 2 +/- 0.9      | 2.5 +/- 1       | 3.6 +/- 1.7    | 2.3 +/- 1.1   | 0.9 +/- 0.8     | 0.2 +/- 0.1   | 19.4 +/- 3.9  | 0.1 +/- 0    | 0.3 +/- 0.1   | 0.5 +/- 0.2    | 2.1 +/- 1.1   |
| L | 175 | Alkamides   | BJN-GCMS-alkamides-30.9-2536.7                        | 0.1 +/- 0      | 0.1 +/- 0      | 1.7 +/- 0.7    | 0.7 +/- 0.5     | 0.3 +/- 0.2    | 1.2 +/- 0.7   | 1.6 +/- 1.4     | 2.5 +/- 2.2   | 13.5 +/- 6.5  | 0.1 +/- 0    | 1.4 +/- 1.1   | 9.6 +/- 8.4    | 2.9 +/- 2.7   |
| S | 176 | Alkamides   | BJN-GCMS-alkamides-31.067-2550.4                      | 3 +/- 1.3      | 0.1 +/- 0      | 2 +/- 1.1      | 9.8 +/- 8       | 1.4 +/- 0.9    | 1.4 +/- 0.5   | 4.1 +/- 2.7     | 0.2 +/- 0.1   | 0.1 +/- 0     | 2.1 +/- 1.6  | 0.3 +/- 0.2   | 0.6 +/- 0.4    | 7.1 +/- 6.9   |
| L | 177 | Alkamides   | BJN-GCMS-alkamides-31.391-2576.6                      | 6.5 +/- 3.9    | 0.1 +/- 0      | 0.1 +/- 0      | 0.2 +/- 0       | 0.1 +/- 0      | 0.2 +/- 0     | 4.3 +/- 1.7     | 3.6 +/- 2     | 15.7 +/- 5.9  | 3.6 +/- 1.7  | 0.1 +/- 0     | 9.3 +/- 8.6    | 8.9 +/- 4.7   |
| S | 178 | Alkamides   | BJN-GCMS-alkamides-31.436-2580.2                      | 0.1 +/- 0      | 0.1 +/- 0      | 2.1 +/- 0.9    | 4.9 +/- 1.6     | 14.2 +/- 3     | 10.6 +/- 1.3  | 13.7 +/- 13     | 2.8 +/- 1.6   | 5.1 +/- 5     | 0.2 +/- 0.1  | 1.1 +/- 0.4   | 0.3 +/- 0.1    | 14.7 +/- 10.3 |
| L | 179 | Alkamides   | BJN-GCMS-alkamides-31.477-2583.5                      | 0.1 +/- 0      | 0.1 +/- 0      | 0.1 +/- 0      | 1.4 +/- 1.3     | 0.1 +/- 0      | 0.2 +/- 0     | 9.2 +/- 5.4     | 1.8 +/- 1.6   | 13.5 +/- 6.4  | 9.3 +/- 6.7  | 0.1 +/- 0     | 20 +/- 14.4    | 0.2 +/- 0.1   |
| A | 180 | Alkamides   | BJN-GCMS-alkamides-31.644-2596.8                      | 14.3 +/- 9.1   | 0.1 +/- 0      | 2.8 +/- 2.7    | 1.1 +/- 0.9     | 3.3 +/- 2.9    | 3.2 +/- 2     | 0.2 +/- 0.1     | 3.6 +/- 3.3   | 3 +/- 1.9     | 0.1 +/- 0    | 0.9 +/- 0.6   | 4.6 +/- 4.3    | 0.2 +/- 0.1   |
| Q | 181 | Alkamides   | BJN-GCMS-alkamides-31.685-2600.1                      | 0.1 +/- 0      | 0.1 +/- 0      | 0.8 +/- 0.7    | 0.2 +/- 0       | 2.6 +/- 2.5    | 3.1 +/- 2.1   | 10.2 +/- 4.9    | 7.2 +/- 2.9   | 10.6 +/- 3.7  | 6.3 +/- 3.7  | 1.2 +/- 1     | 38.7 +/- 23.2  | 13.5 +/- 11.1 |
| K | 182 | Alkamides   | BJN-GCMS-alkamides-32.698-2733.4 (Possible alkamide ) | 2.6 +/- 1.7    | 0.1 +/- 0      | 0.1 +/- 0      | 2.4 +/- 2.2     | 1 +/- 0.9      | 0.2 +/- 0     | 11.6 +/- 10.3   | 13.9 +/- 8.6  | 26.1 +/- 12.9 | 1.5 +/- 1.4  | 0.1 +/- 0     | 0.3 +/- 0.1    | 7.2 +/- 7.1   |
| Q | 183 | Alkamides   | BJN-GCMS-alkamides-33.604-2848.2 (Possible alkamide ) | 26.4 +/- 16.7  | 0.1 +/- 0      | 8.7 +/- 5.7    | 0.2 +/- 0       | 4.9 +/- 4.8    | 5 +/- 3.2     | 9.7 +/- 8.8     | 1.9 +/- 1.6   | 5 +/- 3.5     | 0.1 +/- 0    | 0.1 +/- 0     | 34.5 +/- 15.1  | 0.2 +/- 0.1   |
| Q | 184 | Alkamides   | BJN-GCMS-alkamides-34.786-2991.7                      | 22.4 +/- 7.3   | 9.3 +/- 2.9    | 9.6 +/- 3.6    | 12.3 +/- 8.3    | 10.2 +/- 3.5   | 11 +/- 3      | 2.1 +/- 2       | 3.4 +/- 3.1   | 1.9 +/- 1.8   | 0.1 +/- 0    | 5.3 +/- 1.8   | 35.9 +/- 24.6  | 0.2 +/- 0.1   |
| C | 185 | Amino acids | Proline                                               | 22.5 +/- 4.6   | 21.5 +/- 1.4   | 71.9 +/- 14.9  | 157.6 +/- 10.2  | 53.8 +/- 2.1   | 30.3 +/- 3.7  | 29.8 +/- 7.1    | 42.2 +/- 1.2  | 27.3 +/- 6.5  | 24.3 +/- 7.6 | 18.8 +/- 6.7  | 45.1 +/- 9.6   | 60.9 +/- 10.4 |
| F | 186 | Amino acids | Leucine                                               | 37.2 +/- 0.8   | 31.6 +/- 3.4   | 17.3 +/- 0.6   | 27.7 +/- 2.7    | 20.7 +/- 1.9   | 13.2 +/- 1.9  | 14.7 +/- 4.2    | 13.3 +/- 0.7  | 11.9 +/- 0.8  | 7.8 +/- 3.9  | 8.6 +/- 4.3   | 12.1 +/- 0.9   | 11 +/- 0.6    |
| F | 187 | Amino acids | Asparagine                                            | 58.5 +/- 16.8  | 94.3 +/- 22.2  | 183.3 +/- 46.1 | 227.8 +/- 77.2  | 137.4 +/- 41.5 | 95.9 +/- 8.3  | 40.6 +/- 15.1   | 31.5 +/- 3.8  | 13.2 +/- 6.9  | 20.7 +/- 3.1 | 33.1 +/- 14.1 | 68.4 +/- 12.8  | 43.2 +/- 10.1 |
| F | 188 | Amino acids | Glutamate                                             | 19.3 +/- 4     | 16.1 +/- 1.3   | 49.4 +/- 5     | 47.6 +/- 4.1    | 29.8 +/- 3.9   | 28.8 +/- 4.2  | 28.1 +/- 1.4    | 27.3 +/- 1.9  | 16.4 +/- 1.7  | 17 +/- 5.9   | 12.9 +/- 4.3  | 26.2 +/- 14.4  | 17 +/- 1.8    |
| F | 189 | Amino acids | Phenylalanine                                         | 10.2 +/- 1.3   | 6.4 +/- 0.4    | 9.4 +/- 1.5    | 11.5 +/- 1.4    | 10.6 +/- 1.9   | 5.9 +/- 0.5   | 6.3 +/- 1.5     | 3.8 +/- 0.3   | 4.2 +/- 0.4   | 3.1 +/- 0.5  | 3.5 +/- 1.4   | 6.7 +/- 1.1    | 3.2 +/- 0.2   |
| F | 190 | Amino acids | Glutamine                                             | 97.9 +/- 19.9  | 169.9 +/- 33   | 133.2 +/- 64.7 | 317.1 +/- 178.3 | 120.3 +/- 10.4 | 123.5 +/- 6.5 | 179.7 +/- 101.4 | 39.7 +/- 5.4  | 25.1 +/- 1.9  | 25.3 +/- 3.6 | 26.2 +/- 12.9 | 104.4 +/- 13.8 | 58.3 +/- 7.4  |
| F | 191 | Amino acids | Glycyl-proline dipeptide                              | 48 +/- 7.2     | 42.4 +/- 2.6   | 25.5 +/- 10.8  | 31.2 +/- 5.4    | 21.7 +/- 3.6   | 15.6 +/- 1.8  | 11.6 +/- 2.8    | 8.3 +/- 4.1   | 7.7 +/- 1.2   | 6.9 +/- 3.1  | 3 +/- 0.8     | 30.5 +/- 17.9  | 4.8 +/- 1.7   |
| I | 192 | Amino acids | Alanine                                               | 38.9 +/- 8.4   | 28.6 +/- 1.1   | 31.9 +/- 1.4   | 67.1 +/- 14     | 41.1 +/- 5.3   | 38.4 +/- 7.6  | 33.9 +/- 7.9    | 39.2 +/- 10   | 52.2 +/- 11.8 | 14.6 +/- 7.7 | 17.5 +/- 5.4  | 30.8 +/- 1.6   | 30 +/- 7.6    |
| I | 193 | Amino acids | 3-aminoisobutarate                                    | 29.1 +/- 8.8   | 6.2 +/- 6.2    | 16.6 +/- 2.3   | 21.9 +/- 0.8    | 15.6 +/- 2.6   | 10.7 +/- 3.6  | 21.8 +/- 4.6    | 18.5 +/- 1.7  | 12.4 +/- 1.8  | 17.4 +/- 3.1 | 11.5 +/- 5.8  | 22.7 +/- 2.8   | 15 +/- 0.9    |
| I | 194 | Amino acids | Serine                                                | 21.3 +/- 7.3   | 17.4 +/- 4.1   | 24.4 +/- 5.5   | 32.7 +/- 5.7    | 22.7 +/- 3.7   | 14.6 +/- 1.3  | 45.1 +/- 16.9   | 30.6 +/- 3.3  | 28.3 +/- 3    | 21.7 +/- 2.2 | 21.5 +/- 9    | 22.2 +/- 3.4   | 24.8 +/- 3.6  |
| I | 195 | Amino acids | Aspartate                                             | 35.6 +/- 11.3  | 23 +/- 1.5     | 43.6 +/- 4.8   | 53.6 +/- 3.9    | 36.8 +/- 4.2   | 29.6 +/- 1.2  | 45.8 +/- 9.3    | 34.9 +/- 1.3  | 27.4 +/- 2.3  | 31.3 +/- 9.6 | 27.8 +/- 13.5 | 46 +/- 3.8     | 19.7 +/- 2.8  |
| I | 196 | Amino acids | 2-aminoadipic acid                                    | 29.6 +/- 13.5  | 18.8 +/- 3     | 10.3 +/- 3.8   | 16.5 +/- 1.6    | 13.1 +/- 2.2   | 9.9 +/- 2.5   | 24.6 +/- 2.9    | 18.6 +/- 1.8  | 17.3 +/- 2.9  | 22 +/- 2.4   | 12.8 +/- 3.1  | 45 +/- 17.5    | 14.7 +/- 1.2  |
| N | 197 | Amino acids | Valine                                                | 208.3 +/- 48.4 | 292.9 +/- 72.6 | 48.1 +/- 4.3   | 99.6 +/- 34.6   | 67.3 +/- 8.4   | 35 +/- 1.6    | 53.2 +/- 20.2   | 40.8 +/- 0.8  | 29.5 +/- 6.8  | 27.2 +/- 3.6 | 32.2 +/- 12   | 40.1 +/- 3.3   | 30.7 +/- 2.6  |

|   |     |             |                                   |               |               |               |                |                |               |               |               |                |               |              |                |               |
|---|-----|-------------|-----------------------------------|---------------|---------------|---------------|----------------|----------------|---------------|---------------|---------------|----------------|---------------|--------------|----------------|---------------|
| N | 198 | Amino acids | isoleucine                        | 55.9 +/- 15.8 | 68.8 +/- 6.7  | 22.5 +/- 4.8  | 34.9 +/- 8     | 26.5 +/- 5.4   | 13.9 +/- 1.9  | 17.6 +/- 6.2  | 10.7 +/- 1    | 11.2 +/- 1.3   | 10.3 +/- 1.6  | 7.1 +/- 1.9  | 12.6 +/- 1.4   | 6.8 +/- 0.3   |
| Q | 199 | Amino acids | Ornithine                         | 2.6 +/- 0.4   | 2.1 +/- 0.6   | 3.1 +/- 0.6   | 6.4 +/- 2.5    | 2.9 +/- 0.2    | 1.8 +/- 0.4   | 2.2 +/- 0.3   | 1.9 +/- 0.5   | 1.4 +/- 0.2    | 1.7 +/- 0.5   | 4.1 +/- 2.2  | 26.7 +/- 2.7   | 4.9 +/- 0.6   |
| Q | 200 | Amino acids | Lysine                            | 4.7 +/- 0.9   | 5.8 +/- 0.9   | 4.5 +/- 1.4   | 10 +/- 1.2     | 7.3 +/- 0.8    | 7.6 +/- 1.7   | 4.6 +/- 0.7   | 4.6 +/- 1     | 3.7 +/- 0.7    | 3.9 +/- 1.1   | 2.3 +/- 1    | 23.8 +/- 8     | 6.5 +/- 0.9   |
| Q | 201 | Amino acids | Histidine                         | 21.9 +/- 3.5  | 42.1 +/- 8.5  | 31.2 +/- 15.9 | 103.7 +/- 63.2 | 47.1 +/- 6.7   | 25.6 +/- 11.2 | 8.2 +/- 0.7   | 3.9 +/- 1.4   | 3 +/- 0.8      | 2.2 +/- 0.9   | 11.4 +/- 8.3 | 175.8 +/- 26.1 | 23 +/- 6.5    |
| Q | 202 | Amino acids | Tryptophan                        | 3.7 +/- 0.4   | 5.8 +/- 0.7   | 22.2 +/- 6.8  | 19.5 +/- 6.1   | 12.6 +/- 0.4   | 12.1 +/- 6.4  | 5.5 +/- 2.5   | 3.3 +/- 1.2   | 3.4 +/- 2.1    | 2.1 +/- 0.6   | 3.1 +/- 1.8  | 40.5 +/- 17.9  | 7.9 +/- 3.4   |
| H | 203 | Fatty acids | BJN-GCMS-FAMES-BAOH-9.286-1545.5  | 1.1 +/- 0.4   | 1.5 +/- 0.8   | 9.1 +/- 9.2   | 8.7 +/- 8.2    | 4.1 +/- 5.4    | 2.6 +/- 1.2   | 3.2 +/- 3     | 0.5 +/- 0.3   | 9.6 +/- 9.5    | 0.7 +/- 0.7   | 0.2 +/- 0.1  | 0.3 +/- 0.1    | 0.4 +/- 0.2   |
| F | 204 | Fatty acids | BJN-GCMS-FAMES-BAOH-9.563-1574.3  | 5.3 +/- 4.3   | 1.5 +/- 0.8   | 3.5 +/- 2.1   | 4.1 +/- 3.6    | 1.8 +/- 1.4    | 1.6 +/- 0.5   | 1.6 +/- 1.1   | 0.5 +/- 0.3   | 2.3 +/- 0.6    | 2.3 +/- 0.9   | 0.6 +/- 0.7  | 0.3 +/- 0.1    | 1 +/- 0.6     |
| A | 205 | Fatty acids | BJN-GCMS-FAMES-BAOH-9.686-1586.9  | 4.9 +/- 1.4   | 1.5 +/- 0.8   | 1.5 +/- 0.4   | 1.1 +/- 0.3    | 1.8 +/- 1.4    | 1.6 +/- 0.5   | 1.6 +/- 1.1   | 0.5 +/- 0.3   | 0.8 +/- 1      | 0.2 +/- 0.1   | 0.5 +/- 0.5  | 1.4 +/- 1.9    | 2.1 +/- 0.4   |
| K | 206 | Fatty acids | Hexadecanal                       | 1.1 +/- 0.4   | 1.5 +/- 0.8   | 1.5 +/- 0.4   | 1.1 +/- 0.3    | 1.8 +/- 1.4    | 1.6 +/- 0.5   | 1.6 +/- 1.1   | 0.5 +/- 0.3   | 21.1 +/- 8.3   | 0.4 +/- 0.4   | 0.2 +/- 0.1  | 0.3 +/- 0.1    | 0.4 +/- 0.2   |
| C | 207 | Fatty acids | BJN-GCMS-FAMES-BAOH-10.086-1634.4 | 1.1 +/- 0.4   | 2.2 +/- 0.6   | 21.1 +/- 17.7 | 23.4 +/- 16.4  | 14.5 +/- 14.4  | 6.8 +/- 5.2   | 6 +/- 7.7     | 0.5 +/- 0.3   | 13.2 +/- 0.8   | 2.6 +/- 2.9   | 0.2 +/- 0.1  | 0.3 +/- 0.1    | 7.9 +/- 1.3   |
| C | 208 | Fatty acids | BJN-GCMS-FAMES-BAOH-10.129-1639.7 | 1.1 +/- 0.4   | 2.4 +/- 0.9   | 17.8 +/- 13.4 | 19.7 +/- 13.1  | 13.8 +/- 13.2  | 6.6 +/- 5.2   | 6.2 +/- 8     | 0.5 +/- 0.3   | 6.3 +/- 5.4    | 1.4 +/- 1.9   | 0.2 +/- 0.1  | 0.3 +/- 0.1    | 4.5 +/- 5.5   |
| H | 209 | Fatty acids | BJN-GCMS-FAMES-BAOH-10.202-1648.8 | 1.1 +/- 0.4   | 7.9 +/- 5.6   | 51.9 +/- 42.8 | 58.9 +/- 37.5  | 40.4 +/- 36.6  | 18 +/- 16.2   | 16.7 +/- 20.8 | 2.2 +/- 3.1   | 51.8 +/- 33.1  | 10.3 +/- 3.3  | 0.2 +/- 0.1  | 0.3 +/- 0.1    | 6.7 +/- 9.1   |
| H | 210 | Fatty acids | BJN-GCMS-FAMES-BAOH-10.283-1658.8 | 7.8 +/- 4.6   | 7.6 +/- 2.5   | 19 +/- 7      | 26.5 +/- 14.6  | 19 +/- 14.1    | 9.4 +/- 8.2   | 11.1 +/- 12.3 | 1.9 +/- 2.6   | 16.3 +/- 8.4   | 2.5 +/- 2.1   | 1.1 +/- 0.9  | 1.2 +/- 0.8    | 1.1 +/- 0.7   |
| T | 211 | Fatty acids | BJN-GCMS-FAMES-BAOH-10.48-1682.9  | 1.1 +/- 0.4   | 5 +/- 5.4     | 18.3 +/- 7.4  | 30.2 +/- 17.5  | 14 +/- 9.5     | 11.4 +/- 10.4 | 9.2 +/- 8.8   | 0.5 +/- 0.3   | 12.5 +/- 8.3   | 2.8 +/- 0.9   | 0.2 +/- 0.1  | 0.3 +/- 0.1    | 25.2 +/- 11.3 |
| C | 212 | Fatty acids | BJN-GCMS-FAMES-BAOH-10.591-1696.2 | 1.1 +/- 0.4   | 5.4 +/- 3.4   | 26.7 +/- 29   | 31.7 +/- 18.1  | 22.3 +/- 25.3  | 23.1 +/- 28.8 | 12.1 +/- 12.9 | 0.5 +/- 0.3   | 16.7 +/- 14.3  | 5 +/- 1.9     | 0.2 +/- 0.1  | 0.3 +/- 0.1    | 5 +/- 0.8     |
| H | 213 | Fatty acids | BJN-GCMS-FAMES-BAOH-10.602-1697.5 | 2.7 +/- 2.3   | 8.8 +/- 6.3   | 36.4 +/- 18.4 | 47.7 +/- 42.6  | 33.5 +/- 17.3  | 1.6 +/- 0.5   | 14.1 +/- 12.4 | 9.5 +/- 7.9   | 43.6 +/- 19.2  | 11.1 +/- 3.3  | 0.2 +/- 0.1  | 0.3 +/- 0.1    | 12.1 +/- 2.5  |
| K | 214 | Fatty acids | BJN-GCMS-FAMES-BAOH-10.651-1703.4 | 1.1 +/- 0.4   | 3.4 +/- 2.6   | 9.8 +/- 9.7   | 4.7 +/- 6.1    | 9.1 +/- 9.1    | 5.5 +/- 6.2   | 4.8 +/- 5.6   | 0.5 +/- 0.3   | 35.5 +/- 5.4   | 20.5 +/- 3.6  | 0.2 +/- 0.1  | 0.3 +/- 0.1    | 25.5 +/- 3.3  |
| H | 215 | Fatty acids | BJN-GCMS-FAMES-BAOH-10.698-1708.9 | 1.1 +/- 0.4   | 1.5 +/- 0.8   | 13.3 +/- 9    | 9.2 +/- 9      | 8.1 +/- 6.8    | 6.8 +/- 4.2   | 4 +/- 4.4     | 0.5 +/- 0.3   | 18.2 +/- 0.4   | 4.9 +/- 0.6   | 0.2 +/- 0.1  | 0.3 +/- 0.1    | 0.4 +/- 0.2   |
| H | 216 | Fatty acids | BJN-GCMS-FAMES-BAOH-10.745-1714.5 | 1.1 +/- 0.4   | 3.3 +/- 2.5   | 19.9 +/- 10.2 | 27.8 +/- 16.4  | 19.4 +/- 15.4  | 13.3 +/- 13   | 8.3 +/- 11.6  | 3.7 +/- 2.3   | 21.4 +/- 19    | 12.6 +/- 1.3  | 0.2 +/- 0.1  | 0.3 +/- 0.1    | 11.9 +/- 1.6  |
| H | 217 | Fatty acids | BJN-GCMS-FAMES-BAOH-10.802-1721.2 | 1.1 +/- 0.4   | 2.9 +/- 1.7   | 14.3 +/- 8.7  | 3.1 +/- 3.7    | 10.4 +/- 10.6  | 3.9 +/- 4.2   | 5.9 +/- 7.5   | 0.5 +/- 0.3   | 16.1 +/- 13.9  | 0.2 +/- 0.1   | 0.2 +/- 0.1  | 0.3 +/- 0.1    | 0.4 +/- 0.2   |
| F | 218 | Fatty acids | Tetradecanoic-acid                | 58.5 +/- 27.2 | 95.2 +/- 75.1 | 22.9 +/- 8.1  | 163.2 +/- 52.2 | 133.5 +/- 53.2 | 94.1 +/- 33.5 | 10.4 +/- 7.2  | 8.5 +/- 4.5   | 64.5 +/- 18.2  | 47.2 +/- 24.6 | 3.7 +/- 1.2  | 4.5 +/- 1.3    | 35.4 +/- 4    |
| T | 219 | Fatty acids | BJN-GCMS-FAMES-BAOH-10.983-1742.2 | 4.9 +/- 3.2   | 5.1 +/- 5.6   | 10.2 +/- 2    | 18.4 +/- 5.2   | 14.9 +/- 8.7   | 8.9 +/- 12    | 3.7 +/- 3.8   | 9.1 +/- 6.6   | 5.2 +/- 7.2    | 0.2 +/- 0.1   | 2.2 +/- 2.1  | 2.4 +/- 0.7    | 21.4 +/- 8.2  |
| C | 220 | Fatty acids | BJN-GCMS-FAMES-BAOH-11.147-1761.0 | 1.1 +/- 0.4   | 4.5 +/- 4.4   | 27.8 +/- 10.6 | 30.2 +/- 21.5  | 22.7 +/- 16.1  | 13.7 +/- 10.8 | 11.2 +/- 9.6  | 6 +/- 5.2     | 12.4 +/- 19.7  | 0.2 +/- 0.1   | 0.2 +/- 0.1  | 0.3 +/- 0.1    | 8.9 +/- 1.3   |
| K | 221 | Fatty acids | BJN-GCMS-FAMES-BAOH-11.173-1763.1 | 1.1 +/- 0.4   | 1.5 +/- 0.8   | 1.5 +/- 0.4   | 1.1 +/- 0.3    | 1.8 +/- 1.4    | 1.6 +/- 0.5   | 1.6 +/- 1.1   | 0.5 +/- 0.3   | 38.9 +/- 29    | 0.2 +/- 0.1   | 0.2 +/- 0.1  | 0.3 +/- 0.1    | 0.4 +/- 0.2   |
| E | 222 | Fatty acids | BJN-GCMS-FAMES-BAOH-11.189-1764.9 | 1.1 +/- 0.4   | 1.5 +/- 0.8   | 1.5 +/- 0.4   | 1.1 +/- 0.3    | 1.8 +/- 1.4    | 1.6 +/- 0.5   | 1.6 +/- 1.1   | 0.5 +/- 0.3   | 0.8 +/- 1      | 15.6 +/- 5.5  | 0.2 +/- 0.1  | 0.3 +/- 0.1    | 5.9 +/- 0.3   |
| I | 223 | Fatty acids | BJN-GCMS-FAMES-BAOH-11.212-1768.2 | 10.7 +/- 4    | 4.7 +/- 4.8   | 7.1 +/- 10.1  | 6.5 +/- 9.6    | 1.8 +/- 1.4    | 1.6 +/- 0.5   | 5.2 +/- 3.4   | 5 +/- 3.9     | 6.4 +/- 9.3    | 1.6 +/- 2.4   | 2.8 +/- 0.6  | 3.5 +/- 1      | 11.4 +/- 5.2  |
| H | 224 | Fatty acids | BJN-GCMS-FAMES-BAOH-11.305-1778.8 | 1.1 +/- 0.4   | 3.7 +/- 3.1   | 14.3 +/- 4.7  | 5.1 +/- 6.8    | 11.3 +/- 10.3  | 16.3 +/- 13.2 | 7.2 +/- 6.1   | 0.5 +/- 0.3   | 13.4 +/- 21.3  | 11.7 +/- 2.5  | 0.2 +/- 0.1  | 0.3 +/- 0.1    | 0.4 +/- 0.2   |
| U | 225 | Fatty acids | BJN-GCMS-FAMES-BAOH-11.362-1785.2 | 6.6 +/- 5.3   | 10.8 +/- 9.3  | 16.4 +/- 7.5  | 51.3 +/- 47.6  | 26.1 +/- 11.2  | 6.5 +/- 7.9   | 11.6 +/- 10.5 | 8.5 +/- 7.4   | 0.8 +/- 1      | 0.2 +/- 0.1   | 0.2 +/- 0.1  | 0.3 +/- 0.1    | 99.6 +/- 49.8 |
| H | 226 | Fatty acids | BJN-GCMS-FAMES-BAOH-11.46-1796    | 2.8 +/- 2.5   | 12.2 +/- 9.5  | 33.8 +/- 18   | 43.6 +/- 21.1  | 35.1 +/- 18.1  | 16.7 +/- 15.5 | 14.2 +/- 11.9 | 8.4 +/- 5.9   | 42.9 +/- 12.2  | 23.7 +/- 12.5 | 2.4 +/- 3.9  | 7.4 +/- 7.4    | 16.1 +/- 1.9  |
| H | 227 | Fatty acids | BJN-GCMS-FAMES-BAOH-11.522-1801.5 | 1.1 +/- 0.4   | 4 +/- 3.6     | 15.1 +/- 5    | 18.2 +/- 6.4   | 19 +/- 9.6     | 12.8 +/- 6.4  | 8.4 +/- 7.1   | 4.2 +/- 2.9   | 19 +/- 15.6    | 2.7 +/- 4.4   | 0.2 +/- 0.1  | 0.3 +/- 0.1    | 0.4 +/- 0.2   |
| F | 228 | Fatty acids | Fatty acid - 15:1                 | 18 +/- 14.7   | 7.3 +/- 6     | 13.8 +/- 4.7  | 21.8 +/- 18    | 7.7 +/- 6.1    | 13.6 +/- 10.2 | 3.7 +/- 3.9   | 5.6 +/- 7.8   | 14.5 +/- 11.9  | 14.8 +/- 1.2  | 6 +/- 5.3    | 10.2 +/- 3.8   | 11.4 +/- 2.2  |
| U | 229 | Fatty acids | BJN-GCMS-FAMES-BAOH-11.71-1810.2  | 1.1 +/- 0.4   | 1.5 +/- 0.8   | 1.5 +/- 0.4   | 1.1 +/- 0.3    | 1.8 +/- 1.4    | 1.6 +/- 0.5   | 1.6 +/- 1.1   | 0.5 +/- 0.3   | 0.8 +/- 1      | 0.2 +/- 0.1   | 0.2 +/- 0.1  | 0.3 +/- 0.1    | 12.8 +/- 3.2  |
| H | 230 | Fatty acids | Fatty acid - 15:0                 | 12.3 +/- 2.3  | 17.4 +/- 8.6  | 51 +/- 19.7   | 58.1 +/- 11    | 47.9 +/- 14.9  | 47.7 +/- 13.3 | 22.8 +/- 12.3 | 19.5 +/- 11.6 | 125.3 +/- 29.4 | 38.2 +/- 3.2  | 5.6 +/- 2    | 9.7 +/- 3.1    | 23.8 +/- 0.2  |
| K | 231 | Fatty acids | BJN-GCMS-FAMES-BAOH-11.862-1821.1 | 1.1 +/- 0.4   | 1.5 +/- 0.8   | 1.5 +/- 0.4   | 1.1 +/- 0.3    | 1.8 +/- 1.4    | 1.6 +/- 0.5   | 1.6 +/- 1.1   | 0.5 +/- 0.3   | 13.9 +/- 10.6  | 1.9 +/- 2.9   | 0.2 +/- 0.1  | 0.3 +/- 0.1    | 0.4 +/- 0.2   |
| K | 232 | Fatty acids | BJN-GCMS-FAMES-BAOH-11.912-1825.7 | 16.3 +/- 6.8  | 15.7 +/- 3.8  | 27.9 +/- 11.8 | 47 +/- 27.6    | 33.7 +/- 11.6  | 21.6 +/- 9.2  | 27.7 +/- 18.8 | 18.2 +/- 10.9 | 347.2 +/- 17.3 | 56.3 +/- 12.3 | 2.2 +/- 1.8  | 5.7 +/- 0.9    | 0.4 +/- 0.2   |
| K | 233 | Fatty acids | BJN-GCMS-FAMES-BAOH-11.914-1822.6 | 1.1 +/- 0.4   | 1.5 +/- 0.8   | 1.5 +/- 0.4   | 1.1 +/- 0.3    | 1.8 +/- 1.4    | 1.6 +/- 0.5   | 1.6 +/- 1.1   | 0.5 +/- 0.3   | 13.6 +/- 12    | 12.5 +/- 5.9  | 0.2 +/- 0.1  | 0.3 +/- 0.1    | 10.3 +/- 3.6  |
| F | 234 | Fatty acids | Tetradecanoic acid                | 20.7 +/- 7.4  | 20.3 +/- 9.2  | 61.9 +/- 19.4 | 48.1 +/- 12.9  | 48.8 +/- 19.8  | 43.4 +/- 14.9 | 29.3 +/- 16.8 | 13.8 +/- 9    | 0.8 +/- 1      | 0.2 +/- 0.1   | 1.8 +/- 1.5  | 1.2 +/- 1.7    | 9 +/- 0.6     |
| C | 235 | Fatty acids | BJN-GCMS-FAMES-BAOH-12.038-1829.2 | 1.1 +/- 0.4   | 3.6 +/- 3     | 14.4 +/- 5.6  | 30.2 +/- 20.7  | 18.1 +/- 6.6   | 7.8 +/- 10.3  | 8.9 +/- 7.4   | 7.3 +/- 4.3   | 11.2 +/- 17.6  | 6.9 +/- 5.9   | 0.2 +/- 0.1  | 0.3 +/- 0.1    | 2.4 +/- 3     |
| C | 236 | Fatty acids | BJN-GCMS-FAMES-BAOH-12.14-1834.5  | 3.3 +/- 3.3   | 13.6 +/- 10.4 | 32.9 +/- 13.2 | 57.1 +/- 22.2  | 32.4 +/- 5.2   | 29.2 +/- 8.6  | 18.2 +/- 12.6 | 15 +/- 10.3   | 20.6 +/- 35.2  | 3.6 +/- 5.9   | 0.2 +/- 0.1  | 0.3 +/- 0.1    | 10 +/- 3.3    |
| K | 237 | Fatty acids | BJN-GCMS-FAMES-BAOH-12.226-1839   | 3 +/- 3.4     | 65.7 +/- 23.3 | 61.4 +/- 22.9 | 35.7 +/- 8.2   | 36.5 +/- 12.9  | 35.2 +/- 14.1 | 22.5 +/- 10.5 | 11.3 +/- 7.4  | 35.5 +/- 131.9 | 50.8 +/- 10.9 | 0.2 +/- 0.1  | 0.3 +/- 0.1    | 0.4 +/- 0.2   |
| K | 238 | Fatty acids | BJN-GCMS-FAMES-BAOH-12.28-1841.0  | 1.1 +/- 0.4   | 1.5 +/- 0.8   | 1.5 +/- 0.4   | 1.1 +/- 0.3    | 1.8 +/- 1.4    | 1.6 +/- 0.5   | 1.6 +/- 1.1   | 0.5 +/- 0.3   | 145 +/- 45.3   | 26.5 +/- 8.5  | 0.2 +/- 0.1  | 0.3 +/- 0.1    | 5.4 +/- 0.8   |
| B | 239 | Fatty acids | BJN-GCMS-FAMES-BAOH-12.343-1845.1 | 1.1 +/- 0.4   | 3.7 +/- 3.2   | 31.9 +/- 8.8  | 28.2 +/- 7.8   | 22.7 +/- 6.7   | 17.1 +/- 4.9  | 12.3 +/- 6.7  | 8.7 +/- 6.8   | 0.8 +/- 1      | 11.6 +/- 3.4  | 0.2 +/- 0.1  | 0.3 +/- 0.1    | 12.1 +/- 0.1  |

|   |     |             |                                        |                |                |                |                |                |                |                |                |                |                |                |                |                |                |
|---|-----|-------------|----------------------------------------|----------------|----------------|----------------|----------------|----------------|----------------|----------------|----------------|----------------|----------------|----------------|----------------|----------------|----------------|
| H | 240 | Fatty acids | BJN-GCMS-FAMES-BAOH-12.428-1849        | 1.1 +/- 0.4    | 1.5 +/- 0.8    | 13.1 +/- 5.1   | 13.1 +/- 4.2   | 4.9 +/- 4.2    | 10.2 +/- 8     | 1.9 +/- 0.7    | 6.6 +/- 4      | 10.2 +/- 7.6   | 6.5 +/- 0.6    | 1.1 +/- 1.6    | 0.3 +/- 0.1    | 11.1 +/- 1.7   |                |
| K | 241 | Fatty acids | 9-Hexadecenoic acid                    | 18.8 +/- 1.6   | 21 +/- 6.6     | 71.5 +/- 23.2  | 72.2 +/- 23    | 78.5 +/- 32.8  | 56 +/- 13.1    | 37.8 +/- 17.2  | 21.3 +/- 13.6  | 281.1 +/- 72.8 | 53.2 +/- 15.9  | 6.5 +/- 2.9    | 7.2 +/- 2.7    | 20.4 +/- 28.1  |                |
| C | 242 | Fatty acids | 9,12-Hexadecadienoic acid              | 15.9 +/- 1.3   | 11.2 +/- 3.4   | 100.6 +/- 25.4 | 84.1 +/- 43    | 58.1 +/- 28.4  | 46.6 +/- 19.6  | 113.4 +/- 67.1 | 44.8 +/- 35.9  | 21.5 +/- 36.9  | 6.3 +/- 10.5   | 1.5 +/- 2.4    | 4.1 +/- 3.5    | 76.3 +/- 14    |                |
| I | 243 | Fatty acids | Hexadecanoic acid                      | 16.5 +/- 129.5 | 17.7 +/- 341.2 | 51.3 +/- 328.7 | 1015.3 +/- 309 | 91.3 +/- 435.8 | 96.8 +/- 229.1 | 10.2 +/- 892.4 | 1073 +/- 588.2 | 1351.9 +/- 480 | 1134.3 +/- 204 | 278 +/- 46     | 46.1           | 524.3 +/- 40.1 | 31.1 +/- 141.8 |
| U | 244 | Fatty acids | BJN-GCMS-FAMES-BAOH-13.11-1883.6       | 1.1 +/- 0.4    | 1.5 +/- 0.8    | 1.5 +/- 0.4    | 1.1 +/- 0.3    | 1.8 +/- 1.4    | 1.6 +/- 0.5    | 1.6 +/- 1.1    | 0.5 +/- 0.3    | 6.4 +/- 9.2    | 0.2 +/- 0.1    | 0.2 +/- 0.1    | 0.3 +/- 0.1    | 25.1 +/- 8.1   |                |
| H | 245 | Fatty acids | Cinnamic acid                          | 5.9 +/- 8.5    | 9.4 +/- 7.7    | 38.8 +/- 13.7  | 52.9 +/- 9.7   | 39.2 +/- 9.2   | 33.4 +/- 4.6   | 20.6 +/- 14    | 19.2 +/- 14.7  | 73.5 +/- 5.2   | 20.7 +/- 1.4   | 0.2 +/- 0.1    | 0.3 +/- 0.1    | 20.8 +/- 3.4   |                |
| U | 246 | Fatty acids | BJN-GCMS-FAMES-BAOH-13.221-1888.6      | 1.1 +/- 0.4    | 1.5 +/- 0.8    | 1.5 +/- 0.4    | 1.1 +/- 0.3    | 1.8 +/- 1.4    | 1.6 +/- 0.5    | 1.6 +/- 1.1    | 0.5 +/- 0.3    | 0.8 +/- 1      | 13.3 +/- 22.7  | 8.7 +/- 13.2   | 26.8 +/- 15.2  | 98.9 +/- 16.8  |                |
| H | 247 | Fatty acids | BJN-GCMS-FAMES-BAOH-13.285-1891.7      | 23.8 +/- 3.7   | 39.3 +/- 6.7   | 69.5 +/- 18.2  | 70.8 +/- 31.6  | 60.3 +/- 30.3  | 39.4 +/- 10.5  | 41 +/- 28.2    | 24.4 +/- 12.3  | 100.9 +/- 17.5 | 16 +/- 14.1    | 11 +/- 9.3     | 22.9 +/- 20.3  | 0.4 +/- 0.2    |                |
| D | 248 | Fatty acids | BJN-GCMS-FAMES-BAOH-13.424-1898.3      | 12.2 +/- 13.8  | 19.7 +/- 17.3  | 20.8 +/- 4.7   | 61.3 +/- 51.6  | 16.4 +/- 3     | 24.5 +/- 33.2  | 10.2 +/- 11.3  | 7.6 +/- 10     | 30 +/- 3.6     | 13.7 +/- 5.7   | 10.9 +/- 9.4   | 2.6 +/- 3.9    | 5.8 +/- 7.4    |                |
| K | 249 | Fatty acids | BJN-GCMS-FAMES-BAOH-13.476-1900.7      | 5.3 +/- 7.4    | 13 +/- 10.2    | 39 +/- 11.8    | 44.3 +/- 9.8   | 35.6 +/- 9.1   | 25.4 +/- 1.9   | 18.7 +/- 11.4  | 14.6 +/- 12    | 183.3 +/- 91.8 | 23.4 +/- 10.5  | 0.2 +/- 0.1    | 0.3 +/- 0.1    | 0.4 +/- 0.2    |                |
| U | 250 | Fatty acids | BJN-GCMS-FAMES-BAOH-13.567-1902.6      | 1.1 +/- 0.4    | 1.5 +/- 0.8    | 1.5 +/- 0.4    | 1.1 +/- 0.3    | 1.8 +/- 1.4    | 1.6 +/- 0.5    | 1.6 +/- 1.1    | 0.5 +/- 0.3    | 0.8 +/- 1      | 0.2 +/- 0.1    | 0.2 +/- 0.1    | 0.3 +/- 0.1    | 12.9 +/- 4.1   |                |
| K | 251 | Fatty acids | BJN-GCMS-FAMES-BAOH-13.748-1906.4      | 1.1 +/- 0.4    | 1.5 +/- 0.8    | 1.5 +/- 0.4    | 1.1 +/- 0.3    | 1.8 +/- 1.4    | 1.6 +/- 0.5    | 1.6 +/- 1.1    | 0.5 +/- 0.3    | 7.6 +/- 11.3   | 2.6 +/- 4      | 0.2 +/- 0.1    | 0.3 +/- 0.1    | 0.4 +/- 0.2    |                |
| K | 252 | Fatty acids | BJN-GCMS-FAMES-BAOH-13.791-2008.4      | 2.8 +/- 2.5    | 4.7 +/- 4.9    | 2.3 +/- 1.2    | 13.4 +/- 11.5  | 4.8 +/- 4.1    | 9.7 +/- 7.7    | 1.9 +/- 0.7    | 4.4 +/- 2.5    | 24.8 +/- 23.1  | 11 +/- 3.2     | 1.3 +/- 2      | 0.8 +/- 0.9    | 0.4 +/- 0.2    |                |
| T | 253 | Fatty acids | BJN-GCMS-FAMES-BAOH-13.871-2010.4      | 1.1 +/- 0.4    | 52.7 +/- 9.1   | 14 +/- 4.5     | 24.5 +/- 8.8   | 22 +/- 9.3     | 35 +/- 5.1     | 9.5 +/- 4.8    | 18.3 +/- 10.3  | 0.8 +/- 1      | 3.6 +/- 5.9    | 16.3 +/- 12.8  | 57.9 +/- 18.5  | 116.1 +/- 13.3 |                |
| K | 254 | Fatty acids | BJN-GCMS-FAMES-BAOH-13.929-2011.8      | 1.1 +/- 0.4    | 1.5 +/- 0.8    | 1.5 +/- 0.4    | 1.1 +/- 0.3    | 1.8 +/- 1.4    | 1.6 +/- 0.5    | 1.6 +/- 1.1    | 0.5 +/- 0.3    | 30.2 +/- 8.1   | 7.1 +/- 6.4    | 0.2 +/- 0.1    | 0.3 +/- 0.1    | 0.4 +/- 0.2    |                |
| K | 255 | Fatty acids | BJN-GCMS-FAMES-BAOH-14.025-2014.2      | 1.1 +/- 0.4    | 1.5 +/- 0.8    | 22.4 +/- 6.3   | 23.6 +/- 8.4   | 18.1 +/- 7.7   | 18.9 +/- 2.5   | 7.3 +/- 3.1    | 7.1 +/- 5      | 97.7 +/- 42.5  | 14.5 +/- 2.2   | 0.2 +/- 0.1    | 4.6 +/- 7.6    | 0.4 +/- 0.2    |                |
| U | 256 | Fatty acids | BJN-GCMS-FAMES-BAOH-14.174-2016.8      | 1.1 +/- 0.4    | 1.5 +/- 0.8    | 1.5 +/- 0.4    | 1.1 +/- 0.3    | 1.8 +/- 1.4    | 1.6 +/- 0.5    | 1.6 +/- 1.1    | 0.5 +/- 0.3    | 0.8 +/- 1      | 1.3 +/- 1.8    | 0.2 +/- 0.1    | 0.3 +/- 0.1    | 12.4 +/- 5.8   |                |
| K | 257 | Fatty acids | BJN-GCMS-FAMES-BAOH-14.185-2017.2      | 1.1 +/- 0.4    | 1.5 +/- 0.8    | 1.5 +/- 0.4    | 1.1 +/- 0.3    | 1.8 +/- 1.4    | 1.6 +/- 0.5    | 1.6 +/- 1.1    | 0.5 +/- 0.3    | 14.9 +/- 13.1  | 4 +/- 3.3      | 0.2 +/- 0.1    | 0.3 +/- 0.1    | 0.4 +/- 0.2    |                |
| I | 258 | Fatty acids | Heptadecanoic acid                     | 23.6 +/- 1.6   | 37.8 +/- 8.2   | 34.5 +/- 3     | 62.8 +/- 10.2  | 53.8 +/- 16.9  | 49.2 +/- 2.8   | 27.1 +/- 16.7  | 19.1 +/- 9.4   | 72.3 +/- 15.8  | 30.8 +/- 2.2   | 10.8 +/- 2.8   | 23.9 +/- 11.5  | 27 +/- 1.1     |                |
| K | 259 | Fatty acids | BJN-GCMS-FAMES-BAOH-14.414-2023.7      | 6.4 +/- 4.6    | 6.7 +/- 8.4    | 43.1 +/- 9.5   | 48.5 +/- 14.5  | 36.3 +/- 8.9   | 28.4 +/- 4     | 22.4 +/- 11.9  | 15.5 +/- 13.6  | 166.9 +/- 52   | 34.3 +/- 6.3   | 0.2 +/- 0.1    | 0.3 +/- 0.1    | 2.9 +/- 3.7    |                |
| U | 260 | Fatty acids | BJN-GCMS-FAMES-BAOH-14.518-2025.6      | 1.1 +/- 0.4    | 1.5 +/- 0.8    | 1.5 +/- 0.4    | 1.1 +/- 0.3    | 1.8 +/- 1.4    | 1.6 +/- 0.5    | 1.6 +/- 1.1    | 0.5 +/- 0.3    | 0.8 +/- 1      | 0.2 +/- 0.1    | 0.2 +/- 0.1    | 0.3 +/- 0.1    | 8 +/- 10.5     |                |
| U | 261 | Fatty acids | BJN-GCMS-FAMES-BAOH-14.552-2025.9      | 1.1 +/- 0.4    | 1.5 +/- 0.8    | 1.5 +/- 0.4    | 1.1 +/- 0.3    | 1.8 +/- 1.4    | 1.6 +/- 0.5    | 1.6 +/- 1.1    | 0.5 +/- 0.3    | 0.8 +/- 1      | 0.2 +/- 0.1    | 0.2 +/- 0.1    | 0.3 +/- 0.1    | 6.8 +/- 9.2    |                |
| K | 262 | Fatty acids | BJN-GCMS-FAMES-BAOH-14.667-2027.3      | 1.1 +/- 0.4    | 1.5 +/- 0.8    | 1.5 +/- 0.4    | 1.1 +/- 0.3    | 1.8 +/- 1.4    | 1.6 +/- 0.5    | 1.6 +/- 1.1    | 0.5 +/- 0.3    | 16.3 +/- 12.4  | 2.6 +/- 4      | 0.2 +/- 0.1    | 0.3 +/- 0.1    | 6.8 +/- 8.8    |                |
| U | 263 | Fatty acids | BJN-GCMS-FAMES-BAOH-14.69-2028.5       | 1.1 +/- 0.4    | 1.5 +/- 0.8    | 1.5 +/- 0.4    | 1.1 +/- 0.3    | 1.8 +/- 1.4    | 1.6 +/- 0.5    | 1.6 +/- 1.1    | 0.5 +/- 0.3    | 0.8 +/- 1      | 0.2 +/- 0.1    | 0.2 +/- 0.1    | 0.3 +/- 0.1    | 5.8 +/- 7.8    |                |
| C | 264 | Fatty acids | BJN-GCMS-FAMES-BAOH-14.898-2035.1      | 4.3 +/- 3.3    | 12.9 +/- 12.9  | 28.8 +/- 16.2  | 65.4 +/- 38.3  | 35.4 +/- 8.7   | 18.3 +/- 15.6  | 13.2 +/- 12.4  | 14.6 +/- 15.4  | 26.7 +/- 16.6  | 0.2 +/- 0.1    | 0.2 +/- 0.1    | 0.3 +/- 0.1    | 4.2 +/- 5.1    |                |
| K | 265 | Fatty acids | BJN-GCMS-FAMES-BAOH-14.92-2035.8       | 1.1 +/- 0.4    | 1.5 +/- 0.8    | 1.5 +/- 0.4    | 1.1 +/- 0.3    | 1.8 +/- 1.4    | 1.6 +/- 0.5    | 1.6 +/- 1.1    | 0.5 +/- 0.3    | 17.6 +/- 28.7  | 2.3 +/- 3.6    | 0.2 +/- 0.1    | 0.3 +/- 0.1    | 7.1 +/- 1.8    |                |
| K | 266 | Fatty acids | BJN-GCMS-FAMES-BAOH-14.94-2036.6       | 1.1 +/- 0.4    | 1.5 +/- 0.8    | 1.5 +/- 0.4    | 1.1 +/- 0.3    | 1.8 +/- 1.4    | 1.6 +/- 0.5    | 1.6 +/- 1.1    | 0.5 +/- 0.3    | 45.2 +/- 39    | 8.4 +/- 2.9    | 0.2 +/- 0.1    | 0.3 +/- 0.1    | 0.4 +/- 0.2    |                |
| J | 267 | Fatty acids | BJN-GCMS-FAMES-BAOH-14.962-2036.6      | 1.1 +/- 0.4    | 45.4 +/- 12.3  | 4.5 +/- 5.6    | 11.9 +/- 19    | 19.8 +/- 5     | 73.6 +/- 47.7  | 1.6 +/- 1.1    | 14 +/- 8.2     | 0.8 +/- 1      | 0.2 +/- 0.1    | 0.2 +/- 0.1    | 2.6 +/- 4.1    | 6.7 +/- 9      |                |
| K | 268 | Fatty acids | BJN-GCMS-FAMES-BAOH-15.329-2045.9      | 1.1 +/- 0.4    | 1.5 +/- 0.8    | 1.5 +/- 0.4    | 1.1 +/- 0.3    | 1.8 +/- 1.4    | 1.6 +/- 0.5    | 1.6 +/- 1.1    | 0.5 +/- 0.3    | 12.7 +/- 10.1  | 0.2 +/- 0.1    | 0.2 +/- 0.1    | 0.3 +/- 0.1    | 0.4 +/- 0.2    |                |
| K | 269 | Fatty acids | BJN-GCMS-FAMES-BAOH-15.424-2047.7      | 1.1 +/- 0.4    | 1.5 +/- 0.8    | 1.5 +/- 0.4    | 1.1 +/- 0.3    | 1.8 +/- 1.4    | 1.6 +/- 0.5    | 1.6 +/- 1.1    | 0.5 +/- 0.3    | 5.5 +/- 3.4    | 4.2 +/- 2      | 0.2 +/- 0.1    | 0.3 +/- 0.1    | 6 +/- 0.9      |                |
| I | 270 | Fatty acids | 9,12-Octadecadienoic acid              | 18.7 +/- 324.2 | 32.7 +/- 337.9 | 486.8 +/- 704  | 40.2 +/- 644.7 | 92.7 +/- 518.5 | 06.9 +/- 221.2 | 7.7 +/- 1137.5 | 151 +/- 1045.3 | 53.7 +/- 705.3 | 85.4 +/- 280.1 | 521.3 +/- 47.1 | 69.8 +/- 144.3 | 85.6 +/- 379.1 |                |
| H | 271 | Fatty acids | 9,12,15-Octadecatrienoic acid          | 185.7 +/- 53.4 | 1331.3 +/- 315 | 10.3 +/- 550.3 | 19.5 +/- 608.4 | 75.1 +/- 333.8 | 591.3 +/- 86.5 | 6.1 +/- 1147.9 | 1207 +/- 744.1 | 0.8 +/- 1458.7 | 44.8 +/- 311.3 | 165.8 +/- 33.2 | 40.4 +/- 114.4 | 615.9 +/- 88.3 |                |
| N | 272 | Fatty acids | 10-Octadecenoic acid                   | 28.3 +/- 2.1   | 37 +/- 16.9    | 1.5 +/- 0.4    | 7.4 +/- 11.2   | 1.8 +/- 1.4    | 1.6 +/- 0.5    | 1.6 +/- 1.1    | 0.5 +/- 0.3    | 0.8 +/- 1      | 0.2 +/- 0.1    | 0.2 +/- 0.1    | 0.3 +/- 0.1    | 0.4 +/- 0.2    |                |
| F | 273 | Fatty acids | Octadecanoic acid                      | 17.7 +/- 103.5 | 158.2 +/- 90.6 | 331.5 +/- 25.8 | 458.1 +/- 83.7 | 84.9 +/- 111.9 | 269.3 +/- 46.1 | 24.7 +/- 104.7 | 136 +/- 64     | 402.1 +/- 69.7 | 157.9 +/- 28.4 | 74.4 +/- 28.6  | 95.5 +/- 9.2   | 93.8 +/- 6.1   |                |
| F | 274 | Fatty acids | 2-hydroxy-hexadecanoic acid            | 90.6 +/- 22.3  | 125.5 +/- 13   | 158.9 +/- 46.1 | 203.5 +/- 12.3 | 180.8 +/- 40.6 | 143.5 +/- 21.1 | 88.1 +/- 48.5  | 70.8 +/- 31.7  | 0.8 +/- 1      | 31.8 +/- 3     | 33.5 +/- 7.9   | 48.7 +/- 27.4  | 29.2 +/- 8.2   |                |
| K | 275 | Fatty acids | 9,11,13-Octadecatrienoic acid          | 23.9 +/- 3.3   | 28.8 +/- 6.1   | 51.6 +/- 5     | 73.2 +/- 16.5  | 56.5 +/- 20    | 34.4 +/- 3.2   | 46 +/- 26.4    | 30.5 +/- 20.8  | 35.7 +/- 103.3 | 48.3 +/- 9.2   | 2.1 +/- 3.4    | 3.1 +/- 5      | 12.4 +/- 4     |                |
| H | 276 | Fatty acids | 9,12,15-Octadecatrienoic acid (isomer) | 119.9 +/- 18.3 | 180.2 +/- 32.8 | 182.1 +/- 25.9 | 409.3 +/- 85   | 11.5 +/- 137.3 | 177.5 +/- 19.9 | 284.9 +/- 167  | 219 +/- 142.1  | 65.9 +/- 623.6 | 260.3 +/- 69.6 | 17.7 +/- 2.9   | 35.2 +/- 8.7   | 55.4 +/- 1.3   |                |
| H | 277 | Fatty acids | 10-trans,12-cis-octadecadienoic acid   | 32 +/- 6.4     | 44.5 +/- 7.6   | 62.3 +/- 1.5   | 98.3 +/- 15.9  | 88.8 +/- 32.9  | 50.5 +/- 0.8   | 57.7 +/- 32.8  | 55.3 +/- 31.8  | 112.2 +/- 47   | 48.5 +/- 10.7  | 9.9 +/- 1.8    | 17.7 +/- 5.1   | 25.7 +/- 3.2   |                |
| K | 278 | Fatty acids | BJN-GCMS-FAMES-BAOH-16.696-2074.5      | 36.2 +/- 9.9   | 33.8 +/- 12.2  | 57 +/- 30.4    | 12 +/- 19.2    | 38.3 +/- 12    | 41.4 +/- 17    | 14.5 +/- 21.5  | 9 +/- 14.5     | 37.6 +/- 124.6 | 101.1 +/- 15.5 | 12.9 +/- 5.2   | 27 +/- 8.4     | 32.2 +/- 21.3  |                |
| C | 279 | Fatty acids | BJN-GCMS-FAMES-BAOH-16.742-2075.4      | 15.3 +/- 12.8  | 19.2 +/- 15.6  | 31.4 +/- 26.2  | 87.4 +/- 35.4  | 49.5 +/- 18.8  | 19 +/- 16      | 49.2 +/- 56.8  | 41.9 +/- 40.5  | 0.8 +/- 1      | 0.2 +/- 0.1    | 0.2 +/- 0.1    | 0.3 +/- 0.1    | 6.5 +/- 8.3    |                |
| K | 280 | Fatty acids | BJN-GCMS-FAMES-BAOH-16.885-2078.4      | 1.1 +/- 0.4    | 1.5 +/- 0.8    | 23.1 +/- 3.1   | 21.6 +/- 1.6   | 16.7 +/- 13.8  | 6.3 +/- 7.6    | 16.9 +/- 6.9   | 11.9 +/- 6.3   | 222.1 +/- 37.2 | 46.7 +/- 7.1   | 0.2 +/- 0.1    | 0.3 +/- 0.1    | 3.6 +/- 4.3    |                |
| K | 281 | Fatty acids | BJN-GCMS-FAMES-BAOH-17.011-2080.3      | 1.1 +/- 0.4    | 1.5 +/- 0.8    | 1.5 +/- 0.4    | 1.1 +/- 0.3    | 1.8 +/- 1.4    | 1.6 +/- 0.5    | 1.6 +/- 1.1    | 0.5 +/- 0.3    | 67.9 +/- 21.6  | 16.9 +/- 1.6   | 0.2 +/- 0.1    | 0.3 +/- 0.1    | 0.4 +/- 0.2    |                |

|   |     |             |                                                                  |                |                |                |                |                |                |                |               |                |               |                |               |                |            |
|---|-----|-------------|------------------------------------------------------------------|----------------|----------------|----------------|----------------|----------------|----------------|----------------|---------------|----------------|---------------|----------------|---------------|----------------|------------|
| K | 282 | Fatty acids | BJN-GCMS-FAMES-BAOH-17.153-2083.8                                | 1.1 +/- 0.4    | 5.1 +/- 5.6    | 47.1 +/- 4.3   | 49.4 +/- 10.9  | 38.3 +/- 7.2   | 32.5 +/- 14.9  | 24.8 +/- 15.6  | 16 +/- 13.2   | 152.3 +/- 53.7 | 29.2 +/- 4.2  | 0.2 +/- 0.1    | 0.3 +/- 0.1   | 0.4 +/- 0.2    |            |
| K | 283 | Fatty acids | 7,10-Octadecadienoic acid                                        | 17.5 +/- 3.4   | 28.1 +/- 3     | 55.7 +/- 10.9  | 52.2 +/- 4.5   | 55.2 +/- 24.6  | 46.1 +/- 15.4  | 45.4 +/- 15.1  | 35.1 +/- 12.7 | 349.5 +/- 60.7 | 122 +/- 12.9  | 7.8 +/- 1.5    | 14.4 +/- 2.1  | 52.2 +/- 0.2   |            |
| C | 284 | Fatty acids | 1-Propyl-3-(propen-1-yl)adamantane                               | 3.3 +/- 3.4    | 5.4 +/- 6      | 17.6 +/- 1.1   | 21.1 +/- 7     | 12.5 +/- 9.4   | 15 +/- 11.3    | 13.8 +/- 5.9   | 11.3 +/- 7.9  | 0.8 +/- 1      | 0.2 +/- 0.1   | 0.9 +/- 1.3    | 1.4 +/- 1.8   | 0.4 +/- 0.2    |            |
| A | 285 | Fatty acids | BJN-GCMS-FAMES-BAOH-17.666-2202.2                                | 13.9 +/- 11.6  | 1.5 +/- 0.8    | 11.8 +/- 9.1   | 16.2 +/- 2.7   | 1.8 +/- 1.4    | 1.6 +/- 0.5    | 1.6 +/- 1.1    | 0.5 +/- 0.3   | 0.8 +/- 1      | 0.2 +/- 0.1   | 0.2 +/- 0.1    | 0.3 +/- 0.1   | 0.4 +/- 0.2    |            |
| H | 286 | Fatty acids | 9,12-Octadecadienoic acid                                        | 41.9 +/- 31.4  | 36.3 +/- 18    | 110.8 +/- 18.9 | 113.6 +/- 36.5 | 87.7 +/- 19.8  | 73.4 +/- 16.9  | 51 +/- 19.2    | 35.5 +/- 21.2 | 85.3 +/- 19.5  | 16.5 +/- 3.1  | 8.7 +/- 0.6    | 14.4 +/- 8.9  | 0.4 +/- 0.2    |            |
| K | 287 | Fatty acids | BJN-GCMS-FAMES-BAOH-18.116-2211.9                                | 1.1 +/- 0.4    | 1.5 +/- 0.8    | 1.5 +/- 0.4    | 1.1 +/- 0.3    | 1.8 +/- 1.4    | 1.6 +/- 0.5    | 1.6 +/- 1.1    | 0.5 +/- 0.3   | 70.6 +/- 61.2  | 0.2 +/- 0.1   | 0.2 +/- 0.1    | 0.3 +/- 0.1   | 0.4 +/- 0.2    |            |
| K | 288 | Fatty acids | BJN-GCMS-FAMES-BAOH-18.37-2208.9                                 | 1.1 +/- 0.4    | 1.5 +/- 0.8    | 1.5 +/- 0.4    | 1.1 +/- 0.3    | 1.8 +/- 1.4    | 1.6 +/- 0.5    | 1.6 +/- 1.1    | 0.5 +/- 0.3   | 101.2 +/- 42.9 | 21.7 +/- 4.7  | 0.2 +/- 0.1    | 0.3 +/- 0.1   | 2.1 +/- 2.2    |            |
| H | 289 | Fatty acids | BJN-GCMS-FAMES-BAOH-18.384-2212.2                                | 27.8 +/- 3.9   | 38.6 +/- 2.7   | 69.3 +/- 4.1   | 82.1 +/- 7.8   | 79.1 +/- 31    | 48.2 +/- 5.1   | 58.4 +/- 22.9  | 50.3 +/- 24.1 | 86.5 +/- 3.3   | 16.2 +/- 14.5 | 8.9 +/- 2      | 18 +/- 2.9    | 9.5 +/- 2.5    |            |
| K | 290 | Fatty acids | BJN-GCMS-FAMES-BAOH-18.523-2214.7                                | 1.1 +/- 0.4    | 1.5 +/- 0.8    | 1.5 +/- 0.4    | 1.1 +/- 0.3    | 1.8 +/- 1.4    | 1.6 +/- 0.5    | 1.6 +/- 1.1    | 0.5 +/- 0.3   | 176.8 +/- 90   | 56.5 +/- 30.8 | 0.2 +/- 0.1    | 0.3 +/- 0.1   | 32.1 +/- 0.5   |            |
| K | 291 | Fatty acids | BJN-GCMS-FAMES-BAOH-18.587-2215.5                                | 1.1 +/- 0.4    | 1.5 +/- 0.8    | 1.5 +/- 0.4    | 1.1 +/- 0.3    | 1.8 +/- 1.4    | 1.6 +/- 0.5    | 1.6 +/- 1.1    | 0.5 +/- 0.3   | 74.1 +/- 62.5  | 18.9 +/- 16.8 | 0.2 +/- 0.1    | 0.3 +/- 0.1   | 0.4 +/- 0.2    |            |
| G | 292 | Fatty acids | BJN-GCMS-FAMES-BAOH-18.709-2216.6                                | 1.1 +/- 0.4    | 7.4 +/- 9.5    | 1.5 +/- 0.4    | 7.9 +/- 11.9   | 24.7 +/- 6.4   | 20.4 +/- 4.4   | 1.6 +/- 1.1    | 0.5 +/- 0.3   | 17.9 +/- 13.9  | 0.2 +/- 0.1   | 13.2 +/- 3.3   | 0.3 +/- 0.1   | 0.4 +/- 0.2    |            |
| H | 293 | Fatty acids | BJN-GCMS-FAMES-BAOH-18.755-2217.2                                | 1.1 +/- 0.4    | 1.5 +/- 0.8    | 1.5 +/- 0.4    | 65.3 +/- 41.4  | 53 +/- 16.8    | 24.5 +/- 7.2   | 1.6 +/- 1.1    | 0.5 +/- 0.3   | 116.7 +/- 13.4 | 27.4 +/- 1.8  | 0.2 +/- 0.1    | 0.3 +/- 0.1   | 24.3 +/- 11.3  |            |
| H | 294 | Fatty acids | BJN-GCMS-FAMES-BAOH-18.949-2219.8                                | 1.1 +/- 0.4    | 5.2 +/- 5.7    | 8.8 +/- 12.4   | 119.2 +/- 76.9 | 96.8 +/- 27.6  | 49.8 +/- 16.3  | 7.5 +/- 11.4   | 0.5 +/- 0.3   | 112.2 +/- 27.4 | 22.6 +/- 3.2  | 0.2 +/- 0.1    | 0.3 +/- 0.1   | 0.4 +/- 0.2    |            |
| K | 295 | Fatty acids | BJN-GCMS-FAMES-BAOH-19.26-2223.95                                | 1.1 +/- 0.4    | 1.5 +/- 0.8    | 1.5 +/- 0.4    | 1.1 +/- 0.3    | 1.8 +/- 1.4    | 1.6 +/- 0.5    | 1.6 +/- 1.1    | 0.5 +/- 0.3   | 125.6 +/- 27.8 | 28.9 +/- 4.2  | 0.2 +/- 0.1    | 0.3 +/- 0.1   | 5.3 +/- 0.8    |            |
| F | 296 | Fatty acids | Hexadecanol                                                      | 73.6 +/- 5.3   | 88.4 +/- 18.7  | 95.4 +/- 19    | 186.2 +/- 33.8 | 163.8 +/- 55.1 | 106.8 +/- 2.2  | 6.4 +/- 6.5    | 8.3 +/- 8.1   | 50.8 +/- 9.6   | 11.8 +/- 1.3  | 13.2 +/- 6.7   | 7.3 +/- 3.4   | 3.7 +/- 0.7    |            |
| F | 297 | Fatty acids | BJN-GCMS-FAMES-BAOH-19.52-2229.1                                 | 14.1 +/- 2     | 13.1 +/- 5.4   | 15.7 +/- 4.7   | 54.8 +/- 16.4  | 42.2 +/- 16.1  | 33.1 +/- 3     | 10 +/- 4.2     | 9.7 +/- 3.9   | 28.4 +/- 7.1   | 10.3 +/- 2    | 0.5 +/- 0.7    | 1.4 +/- 2     | 8.4 +/- 1.5    |            |
| K | 298 | Fatty acids | 11,14-Eicosadienoic acid                                         | 1.1 +/- 0.4    | 1.5 +/- 0.8    | 1.5 +/- 0.4    | 1.1 +/- 0.3    | 1.8 +/- 1.4    | 1.6 +/- 0.5    | 1.6 +/- 1.1    | 0.5 +/- 0.3   | 58.2 +/- 6.5   | 17.1 +/- 2    | 0.2 +/- 0.1    | 0.3 +/- 0.1   | 5.2 +/- 1.4    |            |
| F | 299 | Fatty acids | 13-Eicosenoic acid                                               | 16.4 +/- 13.1  | 20.6 +/- 18.3  | 22.9 +/- 13.2  | 00.5 +/- 216.2 | 23.4 +/- 120.1 | 128 +/- 22     | 25 +/- 9.4     | 17.3 +/- 6.7  | 117 +/- 30.8   | 29.4 +/- 3.2  | 0.2 +/- 0.1    | 2.2 +/- 3.4   | 11.1 +/- 3.5   |            |
| A | 300 | Fatty acids | 11-Eicosenoic acid                                               | 38.2 +/- 3.8   | 11.9 +/- 9.1   | 1.5 +/- 0.4    | 7.7 +/- 5.7    | 4.7 +/- 3.9    | 3 +/- 1.9      | 1.6 +/- 1.1    | 0.5 +/- 0.3   | 5.8 +/- 3.5    | 0.2 +/- 0.1   | 0.2 +/- 0.1    | 0.3 +/- 0.1   | 0.4 +/- 0.2    |            |
| F | 301 | Fatty acids | Eicosanoic acid                                                  | 101.4 +/- 8    | 119.3 +/- 25.5 | 88.1 +/- 5.9   | 142.1 +/- 24.6 | 151.1 +/- 47.2 | 125.3 +/- 19.2 | 105.2 +/- 44.3 | 68.2 +/- 34.4 | 70.7 +/- 8.9   | 80.8 +/- 9.5  | 26.7 +/- 8.5   | 42.7 +/- 3.5  | 36.9 +/- 3.7   |            |
| H | 302 | Fatty acids | BJN-GCMS-FAMES-BAOH-21.002-2250.2                                | 1.1 +/- 0.4    | 1.5 +/- 0.8    | 1.5 +/- 0.4    | 1.1 +/- 0.3    | 1.8 +/- 1.4    | 1.6 +/- 0.5    | 1.6 +/- 1.1    | 0.5 +/- 0.3   | 4.6 +/- 3      | 0.2 +/- 0.1   | 0.2 +/- 0.1    | 0.3 +/- 0.1   | 0.4 +/- 0.2    |            |
| K | 303 | Fatty acids | BJN-GCMS-FAMES-BAOH-21.102-2251.4                                | 1.1 +/- 0.4    | 1.5 +/- 0.8    | 1.5 +/- 0.4    | 1.1 +/- 0.3    | 1.8 +/- 1.4    | 1.6 +/- 0.5    | 1.6 +/- 1.1    | 0.5 +/- 0.3   | 7.9 +/- 5.7    | 0.2 +/- 0.1   | 0.2 +/- 0.1    | 0.3 +/- 0.1   | 0.4 +/- 0.2    |            |
| K | 304 | Fatty acids | methyl-parinarate-or-9c,11t,13t,15c-18-4                         | 1.1 +/- 0.4    | 1.5 +/- 0.8    | 1.5 +/- 0.4    | 1.1 +/- 0.3    | 1.8 +/- 1.4    | 1.6 +/- 0.5    | 1.6 +/- 1.1    | 0.5 +/- 0.3   | 6.9 +/- 4.6    | 0.2 +/- 0.1   | 0.2 +/- 0.1    | 0.3 +/- 0.1   | 0.4 +/- 0.2    |            |
| K | 305 | Fatty acids | BJN-GCMS-FAMES-BAOH-21.414-2257.5                                | 1.1 +/- 0.4    | 1.5 +/- 0.8    | 1.5 +/- 0.4    | 1.1 +/- 0.3    | 1.8 +/- 1.4    | 1.6 +/- 0.5    | 1.6 +/- 1.1    | 0.5 +/- 0.3   | 6.8 +/- 10     | 2.3 +/- 3.4   | 0.2 +/- 0.1    | 0.3 +/- 0.1   | 0.4 +/- 0.2    |            |
| H | 306 | Fatty acids | BJN-GCMS-FAMES-BAOH-21.91-2258.7                                 | 1.1 +/- 0.4    | 1.5 +/- 0.8    | 1.5 +/- 0.4    | 1.1 +/- 0.3    | 1.8 +/- 1.4    | 1.6 +/- 0.5    | 1.6 +/- 1.1    | 0.5 +/- 0.3   | 4.3 +/- 5.6    | 1.4 +/- 2     | 0.2 +/- 0.1    | 0.3 +/- 0.1   | 0.4 +/- 0.2    |            |
| P | 307 | Fatty acids | Heneicosanoic acid                                               | 6.8 +/- 5.5    | 4.7 +/- 4.9    | 7 +/- 0.2      | 12.5 +/- 0.9   | 10 +/- 1       | 12.3 +/- 5.5   | 4.8 +/- 2      | 8.9 +/- 3.7   | 2.4 +/- 2.4    | 5.4 +/- 2.3   | 144.2 +/- 59.4 | 61.7 +/- 11.4 | 7 +/- 0.3      |            |
| T | 308 | Fatty acids | 18-Hydroxy-9,12-octadecadienoic acid                             | 102.2 +/- 14.1 | 81.8 +/- 45.6  | 53.8 +/- 19.1  | 250.6 +/- 95.9 | 242.5 +/- 62.4 | 142.7 +/- 20.7 | 1.6 +/- 1.1    | 0.5 +/- 0.3   | 15.8 +/- 4     | 19.2 +/- 3.8  | 0.2 +/- 0.1    | 0.3 +/- 0.1   | 269.3 +/- 116  |            |
| F | 309 | Fatty acids | 9-Octadecen-18-ol                                                | 55.8 +/- 3.4   | 58.3 +/- 26.2  | 141.1 +/- 35.2 | 78.8 +/- 198.9 | 35.8 +/- 110.4 | 207.5 +/- 23.7 | 4.9 +/- 6.8    | 29.2 +/- 12.3 | 12.3 +/- 9.8   | 8.9 +/- 2.3   | 105.9 +/- 16   | 45.7 +/- 17   | 20.8 +/- 7.6   |            |
| F | 310 | Fatty acids | Hexadecanoic-acid,-10,16-bis[(trimethylsilyl)oxy]-,-methyl-ester | 24.4 +/- 10.6  | 25.5 +/- 158.7 | 48.2 +/- 16.4  | 79.6 +/- 18    | 142.3 +/- 84.1 | 41.8 +/- 5.9   | 1.6 +/- 1.1    | 2.8 +/- 4.4   | 34.2 +/- 13.3  | 1.7 +/- 2.6   | 0.2 +/- 0.1    | 0.3 +/- 0.1   | 0.4 +/- 0.2    |            |
| F | 311 | Fatty acids | 11-(3,4-Dimethyl-5-pentyl-2-furyl)-dodecanoic-acid,-methyl-ester | 28.9 +/- 28.6  | 50.2 +/- 85    | 15.5 +/- 3.2   | 58.4 +/- 18.8  | 59.3 +/- 30.1  | 22.6 +/- 7.7   | 1.6 +/- 1.1    | 0.5 +/- 0.3   | 7.9 +/- 5.4    | 9.7 +/- 1.3   | 0.2 +/- 0.1    | 0.3 +/- 0.1   | 7.3 +/- 0.7    |            |
| I | 312 | Fatty acids | Methyl-20-methyl-heneicosanoate                                  | 75.4 +/- 19.2  | 148.9 +/- 27.9 | 90.8 +/- 14.5  | 115.3 +/- 16.5 | 118 +/- 34.7   | 101.5 +/- 24.6 | 88.5 +/- 34.6  | 65.6 +/- 11.4 | 91.5 +/- 20    | 73 +/- 6.1    | 87.4 +/- 16.6  | 45.5 +/- 9.7  | 136.7 +/- 19.5 |            |
| J | 313 | Fatty acids | BJN-GCMS-FAMES-BAOH-24.989-2434.3                                | 3.3 +/- 3.3    | 4.6 +/- 4.6    | 22 +/- 7.4     | 25.5 +/- 11.8  | 28.1 +/- 6.1   | 51.7 +/- 18.1  | 1.6 +/- 1.1    | 0.5 +/- 0.3   | 0.8 +/- 1      | 0.2 +/- 0.1   | 0.2 +/- 0.1    | 17.2 +/- 10.3 | 5.9 +/- 5.5    | 11.1 +/- 1 |
| K | 314 | Fatty acids | BJN-GCMS-FAMES-BAOH-26.127-2597.7                                | 1.1 +/- 0.4    | 1.5 +/- 0.8    | 1.5 +/- 0.4    | 1.1 +/- 0.3    | 1.8 +/- 1.4    | 1.6 +/- 0.5    | 1.6 +/- 1.1    | 0.5 +/- 0.3   | 8.3 +/- 5.6    | 0.2 +/- 0.1   | 0.2 +/- 0.1    | 0.3 +/- 0.1   | 0.4 +/- 0.2    |            |
| E | 315 | Fatty acids | BJN-GCMS-FAMES-BAOH-26.177-2598.4                                | 1.1 +/- 0.4    | 1.5 +/- 0.8    | 1.5 +/- 0.4    | 1.1 +/- 0.3    | 1.8 +/- 1.4    | 1.6 +/- 0.5    | 1.6 +/- 1.1    | 0.5 +/- 0.3   | 0.8 +/- 1      | 7 +/- 2.6     | 0.2 +/- 0.1    | 0.3 +/- 0.1   | 6.9 +/- 0.3    |            |
| I | 316 | Fatty acids | Tricosanoic acid                                                 | 14.8 +/- 6.3   | 19.3 +/- 3.5   | 20.1 +/- 1.4   | 24.9 +/- 6.3   | 27.1 +/- 5.8   | 21.5 +/- 7.5   | 15.7 +/- 6.1   | 18.1 +/- 7.9  | 29.5 +/- 13.6  | 27.7 +/- 1.6  | 12.3 +/- 3     | 10.3 +/- 1.6  | 40.9 +/- 12.4  |            |
| G | 317 | Fatty acids | BJN-GCMS-FAMES-BAOH-26.752-2605.9                                | 1.1 +/- 0.4    | 1.5 +/- 0.8    | 1.5 +/- 0.4    | 30.8 +/- 19.5  | 96.4 +/- 58.3  | 52.1 +/- 26.7  | 1.6 +/- 1.1    | 0.5 +/- 0.3   | 0.8 +/- 1      | 0.2 +/- 0.1   | 0.2 +/- 0.1    | 0.3 +/- 0.1   | 0.4 +/- 0.2    |            |
| F | 318 | Fatty acids | BJN-GCMS-FAMES-BAOH-27.023-2607.7                                | 1.1 +/- 0.4    | 14.4 +/- 22.3  | 5.4 +/- 6.5    | 39.8 +/- 16.9  | 30.6 +/- 10.2  | 8.5 +/- 11.5   | 1.6 +/- 1.1    | 0.5 +/- 0.3   | 0.8 +/- 1      | 0.2 +/- 0.1   | 0.2 +/- 0.1    | 0.3 +/- 0.1   | 0.4 +/- 0.2    |            |
| B | 319 | Fatty acids | BJN-GCMS-FAMES-BAOH-27.142-2608.6                                | 1.1 +/- 0.4    | 1.5 +/- 0.8    | 9.6 +/- 2.6    | 8.1 +/- 6      | 1.8 +/- 1.4    | 1.6 +/- 0.5    | 1.6 +/- 1.1    | 0.5 +/- 0.3   | 0.8 +/- 1      | 0.2 +/- 0.1   | 6 +/- 1.9      | 0.3 +/- 0.1   | 0.4 +/- 0.2    |            |
| F | 320 | Fatty acids | BJN-GCMS-FAMES-BAOH-27.243-2609.2                                | 17.1 +/- 2.9   | 53.2 +/- 40.1  | 20.9 +/- 10.9  | 35.3 +/- 8     | 44.8 +/- 24.6  | 15.6 +/- 11.9  | 1.6 +/- 1.1    | 0.5 +/- 0.3   | 0.8 +/- 1      | 0.2 +/- 0.1   | 0.2 +/- 0.1    | 0.3 +/- 0.1   | 0.4 +/- 0.2    |            |
| G | 321 | Fatty acids | BJN-GCMS-FAMES-BAOH-27.576-2611.4                                | 1.1 +/- 0.4    | 1.5 +/- 0.8    | 1.5 +/- 0.4    | 10.5 +/- 7.7   | 10.7 +/- 7.8   | 5.4 +/- 6.7    | 1.6 +/- 1.1    | 0.5 +/- 0.3   | 0.8 +/- 1      | 0.2 +/- 0.1   | 10.6 +/- 1.8   | 4 +/- 2.2     | 0.4 +/- 0.2    |            |
| N | 322 | Fatty acids | Heptacosanoic acid                                               | 14.8 +/- 10.7  | 69.8 +/- 16.3  | 7.2 +/- 2.4    | 25.3 +/- 10.6  | 23.3 +/- 7.1   | 21.7 +/- 3.1   | 1.6 +/- 1.1    | 0.5 +/- 0.3   | 0.8 +/- 1      | 0.2 +/- 0.1   | 0.2 +/- 0.1    | 0.3 +/- 0.1   | 0.4 +/- 0.2    |            |
| F | 323 | Fatty acids | 2-Hydroxy, methyldocosanoic acid                                 | 62.1 +/- 25.4  | 53.1 +/- 14.4  | 73.7 +/- 23    | 76.4 +/- 7.7   | 71.2 +/- 14.4  | 51.3 +/- 10.2  | 39.6 +/- 21.1  | 27.9 +/- 11.1 | 0.8 +/- 1      | 0.2 +/- 0.1   | 20.1 +/- 7     | 23 +/- 12.1   | 0.4 +/- 0.2    |            |





|   |     |             |                                   |                |                |             |              |             |               |             |             |           |             |             |             |             |
|---|-----|-------------|-----------------------------------|----------------|----------------|-------------|--------------|-------------|---------------|-------------|-------------|-----------|-------------|-------------|-------------|-------------|
| A | 366 | Fatty acids | BJN-GCMS-FAMES-BAOH-44.603-3406.0 | 13.7 +/- 3.3   | 1.5 +/- 0.8    | 1.5 +/- 0.4 | 7.1 +/- 5.4  | 1.8 +/- 1.4 | 1.6 +/- 0.5   | 1.6 +/- 1.1 | 0.5 +/- 0.3 | 0.8 +/- 1 | 0.2 +/- 0.1 | 2 +/- 3.1   | 0.3 +/- 0.1 | 0.4 +/- 0.2 |
| N | 367 | Fatty acids | BJN-GCMS-FAMES-BAOH-44.825-3406.6 | 5.3 +/- 7.4    | 21 +/- 21.5    | 1.5 +/- 0.4 | 1.1 +/- 0.3  | 1.8 +/- 1.4 | 1.6 +/- 0.5   | 1.6 +/- 1.1 | 0.5 +/- 0.3 | 0.8 +/- 1 | 0.2 +/- 0.1 | 0.2 +/- 0.1 | 0.7 +/- 0.3 | 0.4 +/- 0.2 |
| F | 368 | Fatty acids | BJN-GCMS-FAMES-BAOH-44.933-3406.9 | 1.1 +/- 0.4    | 1.5 +/- 0.8    | 1.5 +/- 0.4 | 1.1 +/- 0.3  | 1.8 +/- 1.4 | 1.6 +/- 0.5   | 1.6 +/- 1.1 | 0.5 +/- 0.3 | 0.8 +/- 1 | 0.2 +/- 0.1 | 1.8 +/- 2.1 | 0.3 +/- 0.1 | 0.4 +/- 0.2 |
| F | 369 | Fatty acids | BJN-GCMS-FAMES-BAOH-45.02-3407.2  | 13.2 +/- 4.6   | 4.4 +/- 4.3    | 6.5 +/- 4.9 | 13.7 +/- 9.8 | 9.3 +/- 5.3 | 5.8 +/- 5.5   | 1.6 +/- 1.1 | 1.1 +/- 1   | 0.8 +/- 1 | 0.2 +/- 0.1 | 0.6 +/- 0.4 | 0.3 +/- 0.1 | 0.4 +/- 0.2 |
| F | 370 | Fatty acids | BJN-GCMS-FAMES-BAOH-45.17-3407.6  | 1.1 +/- 0.4    | 1.5 +/- 0.8    | 1.5 +/- 0.4 | 1.1 +/- 0.3  | 1.8 +/- 1.4 | 1.6 +/- 0.5   | 1.6 +/- 1.1 | 0.5 +/- 0.3 | 0.8 +/- 1 | 0.2 +/- 0.1 | 1.5 +/- 1.7 | 0.5 +/- 0.3 | 0.4 +/- 0.2 |
| A | 371 | Fatty acids | Anodendroside-E-2                 | 189.1 +/- 74.8 | 13.9 +/- 148.4 | 1.5 +/- 0.4 | 100 +/- 49.6 | 42.1 +/- 10 | 18.3 +/- 28.3 | 1.6 +/- 1.1 | 0.5 +/- 0.3 | 0.8 +/- 1 | 0.2 +/- 0.1 | 0.3 +/- 0.2 | 0.3 +/- 0.1 | 0.4 +/- 0.2 |
