# Supplementary material
Source: PubMed Central journal article supplement (PMC5195896)
Supplement: NIHMS809006-supplement-Supp_Data_S3.pdf [file NIHMS809006-supplement-Supp_Data_S3.pdf]

**Data S3.** Correlations of *E. purpurea* transcripts with the accumulation of the alkamide, iC4N-12:4 $\Delta^{2E,4E,8Z,10E}$ .

| <b>SEQUENCE ID</b> | <b>UNIFIED FUNCTIONAL ANNOTATION</b>                   | <b>Linear correlation</b> |
|--------------------|--------------------------------------------------------|---------------------------|
| epa_28176          | (S)-N-methylcoclaurine 3'-hydroxylase isozyme          | 0.95                      |
| epa_51401          | Gene of unknown function                               | 0.95                      |
| epa_62338          | Glycosyltransferase UGT88A8                            | 0.94                      |
| epa_12674          | Esterase                                               | 0.93                      |
| epa_74203          | Glycosyltransferase UGT88A9                            | 0.93                      |
| epa_560            | Fatty acid desaturase 2                                | 0.92                      |
| epa_94288          | Gene of unknown function                               | 0.92                      |
| epa_67872          | UPF0497 membrane protein 4                             | 0.92                      |
| epa_3491           | JmjC domain containing protein                         | 0.91                      |
| epa_5314           | Glycerophosphodiester phosphodiesterase                | 0.91                      |
| epa_8352           | Endoplasmic reticulum 18:1 desaturase                  | 0.91                      |
| epa_20699          | Delta-12 desaturase                                    | 0.91                      |
| epa_10189          | D-galacturonic acid reductase 1                        | 0.91                      |
| epa_45114          | Gene of unknown function                               | 0.91                      |
| epa_30917          | 2,4-dienoyl-CoA reductase                              | 0.91                      |
| epa_10479          | (-)-beta-pinene synthase                               | 0.91                      |
| epa_4851           | Phosphatidate cytidyltransferase                       | 0.90                      |
| epa_152332         | Gene of unknown function                               | 0.90                      |
| epa_7313           | Delta3,5-delta2,4-dienoyl-CoA isomerase, mitochondrial | 0.90                      |
| epa_154283         | Gene of unknown function                               | 0.90                      |
| epa_1883           | Delta12-fatty acid acetylenase                         | 0.90                      |
| epa_11281          | Copia-like polyprotein                                 | 0.90                      |
| epa_74523          | Gene of unknown function                               | 0.90                      |
| epa_104972         | 2-heptaprenyl-1,4-naphthoquinone methyltransferase     | 0.89                      |
| epa_57030          | Glutathione S-transferase Z1                           | 0.89                      |
| epa_45650          | AP2/ERF domain-containing transcription factor         | 0.89                      |
| epa_30888          | TSJT1                                                  | 0.89                      |
| epa_12540          | Delta-12 oleate desaturase                             | 0.89                      |
| epa_17744          | Gene of unknown function                               | 0.89                      |
| epa_11059          | Cadinene synthase                                      | 0.89                      |
| epa_2398           | Fatty acid desaturase 2                                | 0.89                      |
| epa_9073           | Retrotransposon gag protein                            | 0.88                      |
| epa_24593          | Pol                                                    | 0.88                      |
| epa_30870          | Delta-12 fatty acid desaturase                         | 0.88                      |
| epa_1254           | Conserved gene of unknown function                     | 0.87                      |
| epa_4727           | Delta-12 fatty acid desaturase                         | 0.87                      |

|            |                                                             |      |
|------------|-------------------------------------------------------------|------|
| epa_66641  | Carbohydrate oxidase                                        | 0.87 |
| epa_49078  | Potassium channel tetramerization domain-containing protein | 0.87 |
| epa_10519  | Embryogenesis-associated protein EMB8                       | 0.87 |
| epa_29815  | Integrase                                                   | 0.87 |
| epa_126159 | (S)-N-methylcochlorine 3'-hydroxylase isozyme               | 0.87 |
| epa_48123  | Gene of unknown function                                    | 0.86 |
| epa_94610  | Gene of unknown function                                    | 0.86 |
| epa_83626  | Gene of unknown function                                    | 0.86 |
| epa_32794  | Alcohol dehydrogenase                                       | 0.86 |
| epa_134030 | LOB domain-containing protein                               | 0.85 |
| epa_19054  | Delta-12 fatty acid acetylenase                             | 0.85 |
| epa_7646   | MRNA, clone: RTFL01-48-B14                                  | 0.85 |
| epa_120381 | Integrase                                                   | 0.84 |
| epa_2466   | Delta-12 oleate desaturase                                  | 0.83 |
| epa_98382  | Gene of unknown function                                    | 0.83 |
| epa_817    | Conserved gene of unknown function                          | 0.83 |
| epa_4090   | MtN19                                                       | 0.83 |
| epa_433    | HEAT repeat family protein                                  | 0.83 |
| epa_2463   | Undecaprenyl pyrophosphate synthetase family protein        | 0.82 |
| epa_102812 | Delta-12 oleate desaturase                                  | 0.82 |
| epa_56037  | Potassium channel tetramerization domain-containing protein | 0.82 |
| epa_34545  | Zinc knuckle containing protein                             | 0.82 |
| epa_14055  | Carbohydrate oxidase                                        | 0.82 |
| epa_5652   | Phosphatidylinositol synthase                               | 0.82 |
| epa_38653  | Cytochrome P450                                             | 0.82 |
| epa_47038  | Gene of unknown function                                    | 0.82 |
| epa_57156  | Benzoyl CoA benzoic acid benzoyltransferase                 | 0.82 |
| epa_21467  | EDA40 (embryo sac development arrest 40)                    | 0.81 |
| epa_5415   | Zinc finger (Ran-binding) family protein                    | 0.81 |
| epa_16070  | Gene of unknown function                                    | 0.81 |
| epa_859    | Germacrene A synthase 2                                     | 0.81 |
| epa_109410 | Hydrolase, hydrolyzing O-glycosyl compounds                 | 0.81 |
| epa_1834   | Ubx domain-containing                                       | 0.81 |
| epa_11279  | Tryptophan decarboxylase                                    | 0.80 |
| epa_44400  | Conserved gene of unknown function                          | 0.80 |
| epa_102523 | Gene of unknown function                                    | 0.80 |
| epa_20959  | Gene of unknown function                                    | 0.79 |
| epa_26999  | Mitogen-activated protein kinase kinase kinase              | 0.79 |
| epa_24667  | U3 small nucleolar RNA-associated protein                   | 0.79 |
| epa_103    | Alpha-amylase                                               | 0.79 |

|           |                                                              |      |
|-----------|--------------------------------------------------------------|------|
| epa_16768 | Zinc ion binding protein                                     | 0.79 |
| epa_52314 | K <sup>+</sup> channel inward rectifying                     | 0.79 |
| epa_20299 | Gene of unknown function                                     | 0.79 |
| epa_23694 | Gene of unknown function                                     | 0.79 |
| epa_24574 | Gene of unknown function                                     | 0.79 |
| epa_28795 | Gene of unknown function                                     | 0.79 |
| epa_33091 | Triacylglycerol lipase 2                                     | 0.79 |
| epa_40512 | Heat shock protein 70 (HSP70)-interacting protein            | 0.79 |
| epa_42375 | Integrase                                                    | 0.79 |
| epa_49079 | Gene of unknown function                                     | 0.79 |
| epa_57649 | Gene of unknown function                                     | 0.79 |
| epa_16492 | Gene of unknown function                                     | 0.79 |
| epa_30645 | Gene of unknown function                                     | 0.79 |
| epa_33321 | Gene of unknown function                                     | 0.79 |
| epa_60356 | Gene of unknown function                                     | 0.79 |
| epa_6070  | Vacuolar ATP synthase 21 kDa proteolipid subunit             | 0.79 |
| epa_62274 | Gene of unknown function                                     | 0.79 |
| epa_81411 | Gene of unknown function                                     | 0.79 |
| epa_85413 | Pentatricopeptide repeat-containing protein                  | 0.79 |
| epa_93147 | Gene of unknown function                                     | 0.79 |
| epa_40965 | Whole genome shotgun sequence assembly, scaffold_1, strain M | 0.79 |
| epa_47749 | 60S ribosomal protein L10-B                                  | 0.79 |
| epa_61023 | Gene of unknown function                                     | 0.79 |
| epa_64183 | Sucrose transporter SUC2                                     | 0.79 |
| epa_92846 | Gene of unknown function                                     | 0.79 |
| epa_57323 | Gene of unknown function                                     | 0.79 |
| epa_55701 | Gene of unknown function                                     | 0.79 |
| epa_94076 | Gene of unknown function                                     | 0.79 |
| epa_50652 | Cytochrome P450                                              | 0.79 |
| epa_9982  | Laccase 90c                                                  | 0.79 |
| epa_1115  | Protein kinase                                               | 0.78 |
| epa_16468 | LEDI-5c protein                                              | 0.78 |
| epa_7949  | Plant ubiquilin                                              | 0.78 |
| epa_5161  | Embryogenesis-associated protein EMB8                        | 0.78 |
| epa_74785 | Sulfate transporter                                          | 0.78 |
| epa_6381  | Oleoyl-acyl carrier protein thioesterase                     | 0.78 |
| epa_55122 | Conserved gene of unknown function                           | 0.78 |
| epa_13488 | Lyase                                                        | 0.78 |
| epa_62403 | Wound-induced protein                                        | 0.78 |
| epa_40331 | Gene of unknown function                                     | 0.78 |

|            |                                                      |      |
|------------|------------------------------------------------------|------|
| epa_30039  | Gene of unknown function                             | 0.78 |
| epa_50798  | Nucleic acid binding protein                         | 0.78 |
| epa_4770   | Cellulose synthase                                   | 0.77 |
| epa_41641  | Defensin                                             | 0.77 |
| epa_66516  | Gene of unknown function                             | 0.77 |
| epa_84706  | Gene of unknown function                             | 0.77 |
| epa_33067  | Gene of unknown function                             | 0.77 |
| epa_32931  | Minor allergen Alt a                                 | 0.76 |
| epa_2473   | ACS2                                                 | 0.76 |
| epa_59232  | Subtilase                                            | 0.76 |
| epa_34270  | Gene of unknown function                             | 0.76 |
| epa_43760  | Cytidine deaminase 1, 2, 7                           | 0.76 |
| epa_15956  | Gene of unknown function                             | 0.76 |
| epa_13792  | LTRGag-pol-polymerase 3                              | 0.76 |
| epa_4993   | ABI3-interacting protein 2-1 protein                 | 0.75 |
| epa_59552  | Gene of unknown function                             | 0.75 |
| epa_28243  | C3HL domain class transcription factor               | 0.75 |
| epa_59591  | Gene of unknown function                             | 0.75 |
| epa_73877  | NAC domain class transcription factor                | 0.75 |
| epa_148843 | Gamma-interferon-inducible lysosomal thiol reductase | 0.75 |
| epa_146530 | Xylem serine proteinase 1                            | 0.75 |
| epa_39903  | Pol polyprotein                                      | 0.75 |
| epa_96436  | Hydrolase/ protein serine/threonine phosphatase      | 0.75 |
| epa_84011  | Vegetative storage protein, VSP                      | 0.75 |
| epa_8952   | Cytochrome P450                                      | 0.75 |
| epa_116520 | Xylem serine proteinase 1                            | 0.75 |
| epa_94859  | Gene of unknown function                             | 0.74 |
| epa_20830  | Homeobox-leucine zipper protein ATHB-40              | 0.74 |
| epa_66517  | MRNA, clone: RTFL01-03-H07                           | 0.74 |
| epa_1829   | Delta-12 oleate desaturase                           | 0.74 |
| epa_3108   | Serine/threonine protein kinase                      | 0.74 |
| epa_19522  | Sulfate transporter                                  | 0.74 |
| epa_50761  | Respiratory burst oxidase                            | 0.74 |
| epa_51676  | Chaperone protein DNAj                               | 0.74 |
| epa_59801  | Benzoyl CoA benzoic acid benzoyltransferase          | 0.74 |
| epa_32482  | Esterase                                             | 0.74 |
| epa_57889  | WRKY DNA binding protein                             | 0.74 |
| epa_1866   | Signal transducer                                    | 0.74 |
| epa_24211  | Conserved gene of unknown function                   | 0.74 |
| epa_44256  | Desacetoxyvindoline 4-hydroxylase                    | 0.73 |

|            |                                               |      |
|------------|-----------------------------------------------|------|
| epa_73190  | Gene of unknown function                      | 0.73 |
| epa_38004  | Carbohydrate esterase                         | 0.73 |
| epa_139927 | Gene of unknown function                      | 0.73 |
| epa_68452  | Gene of unknown function                      | 0.73 |
| epa_77747  | Gene of unknown function                      | 0.73 |
| epa_83443  | Leucine-rich repeat receptor kinase           | 0.73 |
| epa_8876   | Gene of unknown function                      | 0.73 |
| epa_41313  | Cytokinin oxidase                             | 0.73 |
| epa_37766  | Binding protein                               | 0.73 |
| epa_35041  | Gene of unknown function                      | 0.73 |
| epa_37815  | Conserved gene of unknown function            | 0.73 |
| epa_17278  | Glycosyltransferase                           | 0.73 |
| epa_1112   | Serine-threonine protein kinase, plant-type   | 0.73 |
| epa_20903  | Gene of unknown function                      | 0.72 |
| epa_22727  | EDA40 (embryo sac development arrest 40)      | 0.72 |
| epa_29079  | Zinc finger CCCH domain-containing protein 39 | 0.72 |
| epa_85443  | MuDR family transposase                       | 0.72 |
| epa_10098  | Gene of unknown function                      | 0.72 |
| epa_99576  | Desacetoxyvindoline 4-hydroxylase             | 0.72 |
| epa_75050  | Gene of unknown function                      | 0.72 |
| epa_128944 | Gene of unknown function                      | 0.72 |
| epa_147774 | Subtilisin-like serine proteinase             | 0.72 |
| epa_36810  | UPF0497 membrane protein 17                   | 0.72 |
| epa_121085 | ATMAP70-2                                     | 0.71 |
| epa_54424  | Lyase                                         | 0.71 |
| epa_2233   | Gene of unknown function                      | 0.71 |
| epa_336    | Myosin heavy chain, clone                     | 0.71 |
| epa_3827   | IBR3 (IBA-RESPONSE 3)                         | 0.71 |
| epa_53782  | Pectinesterase-2                              | 0.71 |
| epa_29762  | Gene of unknown function                      | 0.71 |
| epa_31336  | Gene of unknown function                      | 0.71 |
| epa_37728  | Gene of unknown function                      | 0.71 |
| epa_69725  | Xylem serine proteinase 1                     | 0.71 |
| epa_8835   | Bidirectional sugar transporter SWEET7        | 0.71 |
| epa_80860  | Guanine nucleotide exchange factor            | 0.71 |
| epa_14758  | MYB19                                         | 0.71 |
| epa_54455  | Gene of unknown function                      | 0.71 |
| epa_69724  | Cucumisin-like serine protease                | 0.71 |
| epa_63977  | Beta-glucosidase                              | 0.70 |
| epa_9039   | Zinc transporter                              | 0.70 |

|           |                                               |      |
|-----------|-----------------------------------------------|------|
| epa_45078 | Anthocyanin malonyltransferase homolog        | 0.70 |
| epa_4888  | Chaperone clpb                                | 0.70 |
| epa_29814 | Conserved gene of unknown function            | 0.70 |
| epa_7119  | Plant ubiquilin                               | 0.70 |
| epa_44272 | Conserved gene of unknown function            | 0.70 |
| epa_75233 | TO45-2                                        | 0.70 |
| epa_49412 | Gene of unknown function                      | 0.70 |
| epa_14717 | Jacalin-like lectin domain containing protein | 0.70 |
| epa_27895 | Gene of unknown function                      | 0.70 |
| epa_39047 | Cytochrome P450                               | 0.70 |
| epa_41039 | Gene of unknown function                      | 0.70 |
| epa_40963 | Gene of unknown function                      | 0.70 |
