# Supplementary material
Source: PubMed Central journal article supplement (PMC5195896)

- iC4N-12:4Δ2E,4E,8Z,10E/Z iso2
- ◆ iC4N-12:4Δ2E,4E,8Z,10E/Z iso3
- PNA 1977
- ✖ PNA 1989
- ▲ PNA 2079
- ◆ PNA 2351
- ✖ PNA 2848
- ✖ iC4N-12:2Δ2E,4Z;8,10diyne
- iC4N-12:4Δ2E,4E,8Z,10E/Z iso1
- ◆ iC4N-13:2Δ2E,7Z;10,12diyne
- iC4N-12:2Δ2E,4E
- aC5N-11:2Δ2E,4Z;8,10diyne
- PNA 2152
- ◆ PNA 2200
- ▲ iC4N-11:2Δ2Z,4E;8,10diyne
- ✖ PNA 2103
- ✖ PNA 2378
- ◆ iC4N-12:4Δ2E,4E,8Z,10E/Z iso4
- aC5N-12:2Δ2E,4Z;8,10diyne
- iC4N-12:3Δ2E,4E,8Z
- ✖ PNA 2074
- ▲ PNA 2500
- ◆ PNA 2057
- PNA 2084
- ✖ PNA 2217
- ▲ PNA 2228
- ◆ PNA 2387
- PNA 2156
- PNA 2388
- PNA 2181
- ◆ PNA 2128
- PNA 2219
- ▲ PNA 2733

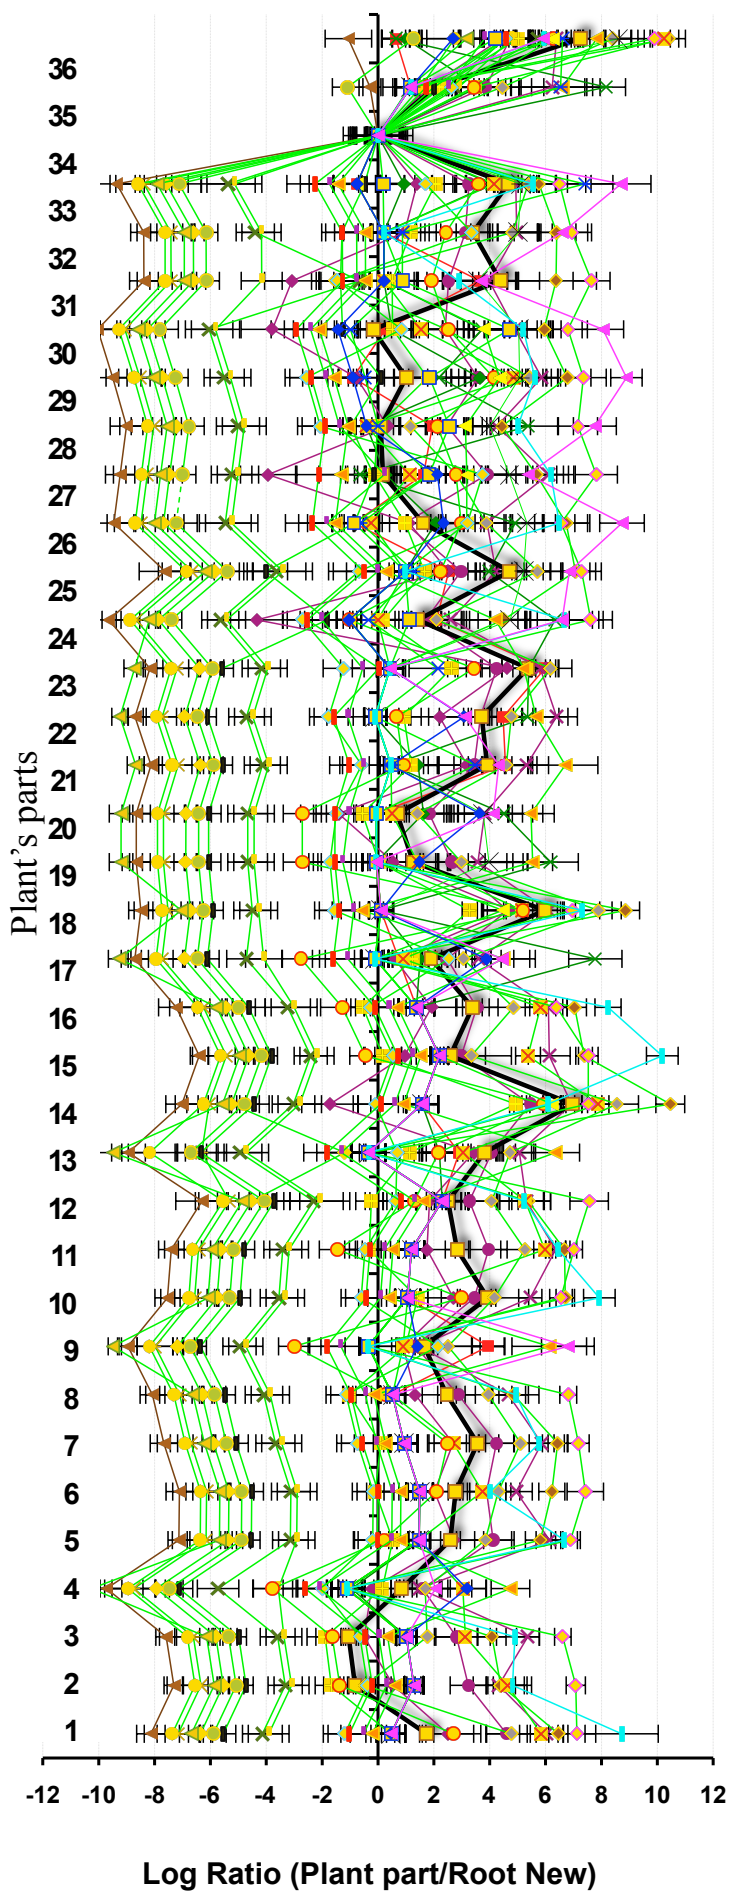

Supplement: NIHMS809006-supplement-Supp_Fig_S1.pdf [file NIHMS809006-supplement-Supp_Fig_S1.pdf]
