# Supplementary material
Source: PubMed Central journal article supplement (PMC5195896)

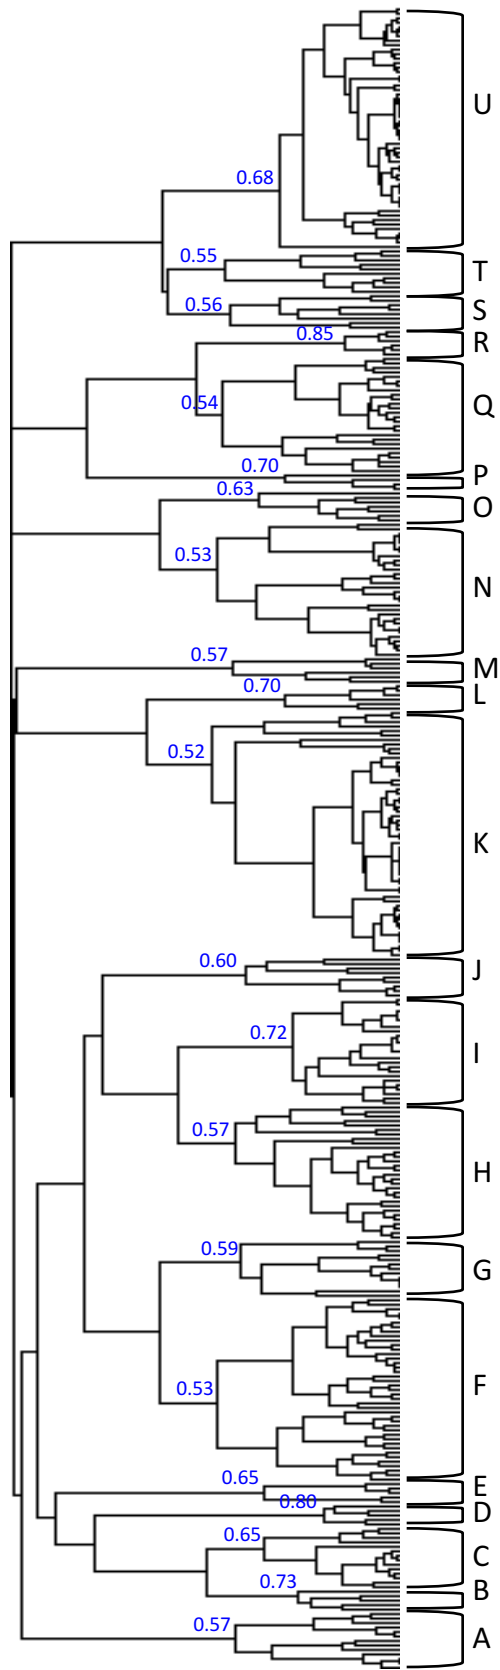

Supplement: NIHMS809006-supplement-Supp_Fig_S2.pdf [file NIHMS809006-supplement-Supp_Fig_S2.pdf]

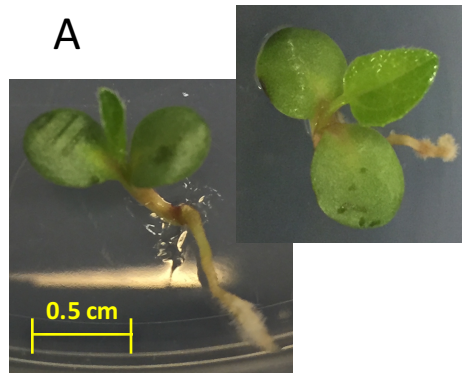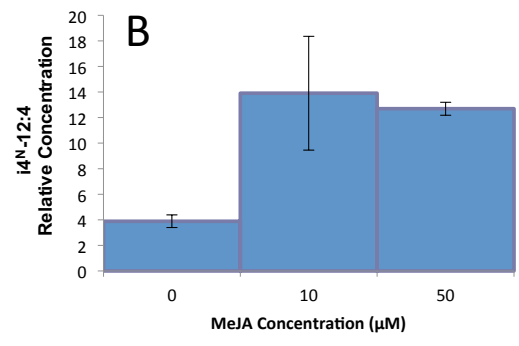

Supplement: NIHMS809006-supplement-Supp_Fig_S3.pdf [file NIHMS809006-supplement-Supp_Fig_S3.pdf]

**A**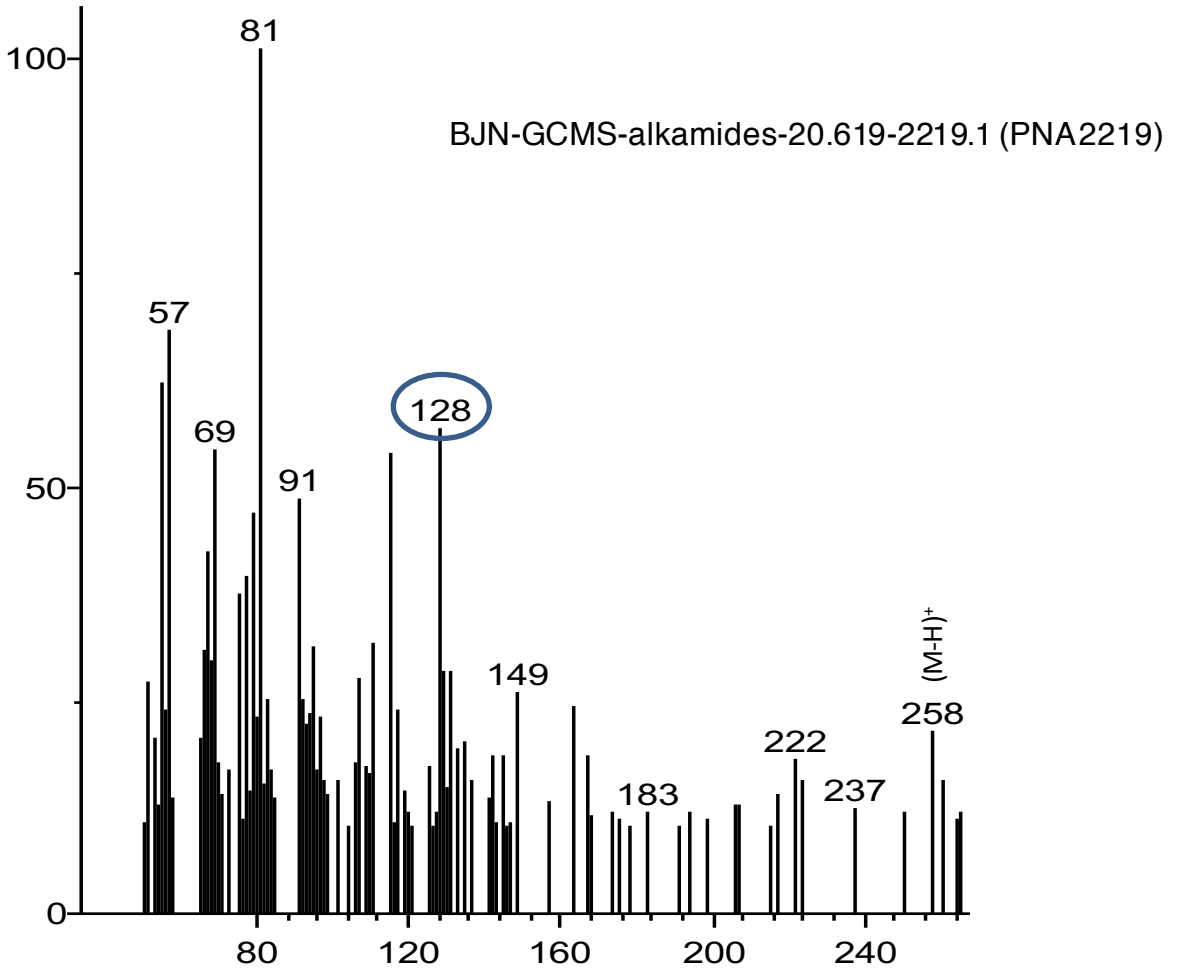**B**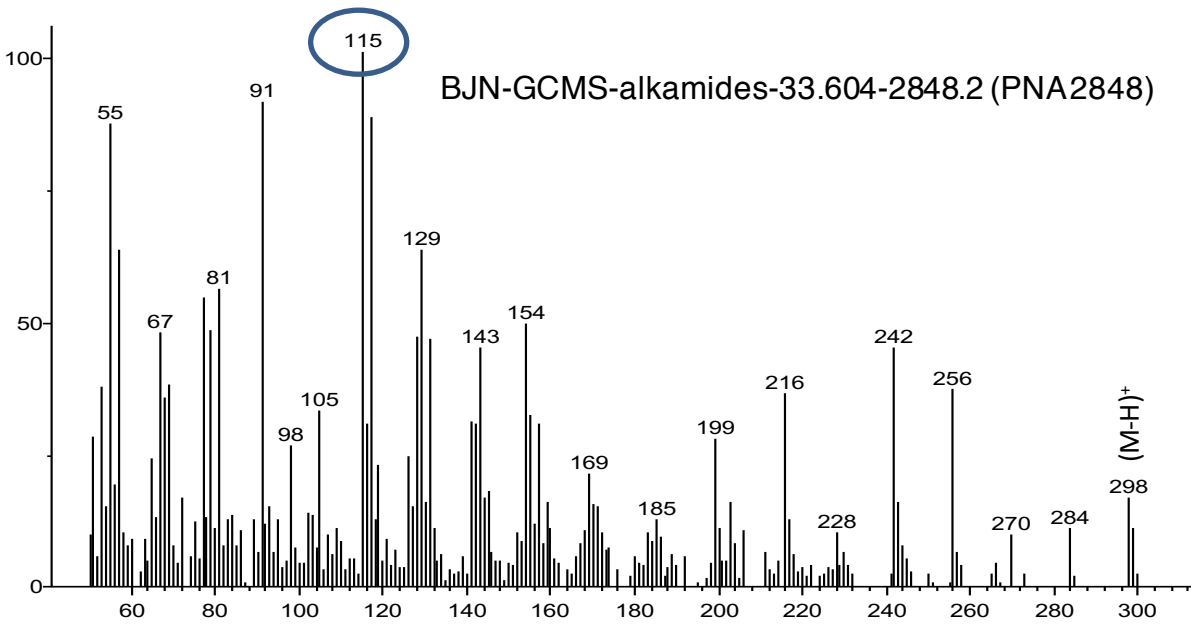

Supplement: NIHMS809006-supplement-Supp_Fig_S4.pdf [file NIHMS809006-supplement-Supp_Fig_S4.pdf]
